# Supplementary material for: NH 3 emissions from large point sources derived from CrIS and IASI satellite observations
Source: Copernicus journal article supplement (doi:10.5194/acp-2019-453), 2019-06-05
Supplement: Supplementary file 1 [file Merged_final_locations_and_emissions.xlsx]

## Sheet: CrIS
index	code_name	Name	region_CrIS	lon	lat	Emission_CrIS	Emission_uncertainty_CrIS	HTAPv2_no_agri_0.500.25	HTAPv2_0.500.25	HTAPv2_no_agri_1.001.00	HTAPv2_no_agri_1.000.50	HTAPv2_1.000.50	HTAPv2_1.001.00	corr_x_CrIS
3	intergados_vicente_nobre_13	intergados_vicente_nobre	Europe_wide	-8.87	39.28	12.6284	0.404077	0.118659	1.01767	0.64264	0.307983	2.89266	5.20391	0.396851
8	aterro_de_lamas_18	aterro_de_lamas	Europe_wide	-8.67	39.45	9.95111	0.338108	0.0706595	0.752991	0.553228	0.239245	2.33118	5.02384	0.378538
10	its_ind_stria_transformadora_de_subprodutos_sa_19	its_ind_stria_transformadora_de_subprodutos_sa	Europe_wide	-8.46	39.04	9.68927	0.374305	0.0266434	0.344677	0.354405	0.131565	2.01675	4.74305	0.349489
20	refiner_a_la_r_bida_514	refiner_a_la_r_bida	Europe_wide	-6.90097	37.1844	8.42756	0.439513	1.03735	1.57175	1.17946	1.11464	2.8356	3.51229	0.311562
26	finca_ca_ada_de_ronquera_33	finca_ca_ada_de_ronquera	Europe_wide	-5.7	37.42	12.0916	0.41745	0.110315	1.8746	0.483581	0.303339	5.04913	8.08667	0.435533
32	El_Viso_Pozoblanco_423	El_Viso_Pozoblanco	Europe_wide	-4.89	38.43	23.9941	0.442893	0.0484954	0.357587	0.213529	0.12115	1.45454	2.97268	0.633472
34	explotaciones_avicolas_garcia_puente_sa_40	explotaciones_avicolas_garcia_puente_sa	Europe_wide	-4.68	41.29	8.98823	0.349949	0.0472652	1.59599	0.338161	0.155598	5.36405	10.3245	0.35278
36	Menasalbas_425	Menasalbas	Europe_wide	-4.26	39.64	17.3288	0.468867	0.0335854	1.05619	0.334961	0.124112	4.0365	8.50982	0.483795
61	Lorca_Puerto_Lumbreras_424	Lorca_Puerto_Lumbreras	Europe_wide	-1.76	37.58	26.0665	0.591365	0.0412349	0.935471	0.269584	0.148509	3.06776	6.32159	0.59355
63	holcim_f_brica_de_lorca_69	holcim_f_brica_de_lorca	Europe_wide	-1.71	37.7	30.8012	0.637298	0.0478939	1.10013	0.288364	0.157993	3.62916	7.68846	0.625312
71	Canovas_422	Canovas	Europe_wide	-1.26	37.74	35.1064	0.656234	0.0471831	1.003	0.815166	0.656492	3.71685	6.75794	0.657013
73	carnicas_75	carnicas	Europe_wide	-1.13	37.99	21.7662	0.540836	0.0922772	1.43155	0.880262	0.240131	4.13439	7.15646	0.553195
75	eclosion_sas_78	eclosion_sas	Europe_wide	-1.05	47.08	24.8378	0.655519	0.0692562	1.37417	0.534143	0.278686	5.97149	11.4496	0.426631
85	Arzew_Sofert_Ammonia_Plants_580	Arzew_Sofert_Ammonia_Plants	Europe_wide	-0.340962	35.8059	14.4595	0.629706	0.0345133	0.190793	0.12509	0.0767855	0.612447	1.12034	0.402894
89	granja_sena_86	granja_sena	Europe_wide	-0.04	41.72	22.6044	0.751984	0.0357813	1.5361	0.371778	0.283275	6.04868	10.9975	0.384887
96	lleidacamp_98	lleidacamp	Europe_wide	0.42	41.8	31.4488	0.796419	0.0408727	2.49197	0.382251	0.281769	7.34505	11.2377	0.494397
98	cal_muntany_s_sat_1058_99	cal_muntany_s_sat_1058	Europe_wide	1	42	24.5042	0.727045	0.0233335	2.90452	0.201206	0.0757277	7.48367	11.5582	0.444823
105	Vic_Manlleu_426	Vic_Manlleu	Europe_wide	2.26	42	23.2326	0.495967	0.0462258	1.07087	0.325753	0.172649	4.26925	6.93319	0.619785
113	ursa_benelux_114	ursa_benelux	Europe_wide	3.36	50.89	24.087	0.86109	0.200901	7.97111	1.73088	0.69407	19.8655	28.3261	0.354725
141	attero_venlo_143	attero_venlo	Europe_wide	6.11	51.39	18.2108	0.630557	0.099162	4.9229	1.76066	0.942224	14.6552	25.1283	0.356819
187	Gadesco_Pieve_CHP_812	Gadesco_Pieve_CHP	Europe_wide	10.12	45.15	24.6967	0.772657	0.0896933	7.77056	1.04623	0.513308	41.4548	58.0951	0.471599
193	sia_societ_industria_agglomerati_srl_191	sia_societ_industria_agglomerati_srl	Europe_wide	10.52	44.92	19.8313	0.685063	0.165383	5.98346	1.08721	0.532069	22.4806	57.0851	0.414817
198	Sapio_Mantua_Hydrogen_Plant_488	Sapio_Mantua_Hydrogen_Plant	Europe_wide	10.8489	45.1438	25.2877	0.691429	0.132121	9.25073	1.09785	0.533269	37.3281	54.5388	0.498779
277	Kutina_ammonia_plant_698	Kutina_ammonia_plant	Europe_wide	16.8009	45.4679	12.15	0.266454	0.836248	1.27666	1.21825	1.02403	3.99606	7.18217	0.555907
295	Kedzierzyn_Ammonia_Plant_714	Kedzierzyn_Ammonia_Plant	Europe_wide	18.2499	50.3162	15.8825	0.315104	0.0369548	0.851565	0.702545	0.208557	3.04598	6.76731	0.573789
309	Biezun_419	Biezun	Europe_wide	19.88	52.97	19.7181	0.335164	0.00827266	0.886242	0.102146	0.0474116	4.48513	8.80094	0.58383
318	Pulawy_Azoty_I_713	Pulawy_Azoty_I	Europe_wide	21.9853	51.4577	27.5842	0.388228	0.0196214	0.658529	0.146947	0.0735872	3.32751	7.06733	0.683368
334	Grodno_ammonia_3_697	Grodno_ammonia_3	Europe_wide	23.9077	53.675	26.8296	0.439638	1.21037	3.13195	1.2826	1.24009	5.2768	8.04374	0.578269
341	Jonava_Ammonia_Plant_No_1_690	Jonava_Ammonia_Plant_No_1	Europe_wide	24.3423	55.0881	21.2048	0.371742	0.0152807	0.800424	9.25332	9.18392	11.8775	13.583	0.539844
344	Targu_705	Targu	Europe_wide	24.5088	46.5169	18.2237	0.317022	0.156761	0.912732	0.734172	0.404036	2.92509	5.85454	0.716738
373	sc_amonil_sa_slobozia_708	sc_amonil_sa_slobozia	Europe_wide	27.3848	44.5322	17.6098	0.459821	0.0810286	0.830666	0.662831	0.347728	4.19999	7.70132	0.476461
386	Basmakci_428	Basmakci	Europe_wide	30	37.88	9.41293	0.331714	0.0310772	0.836184	0.134935	0.082469	1.92813	3.49897	0.462634
389	Afyonkarahisar_427	Afyonkarahisar	Europe_wide	30.6	38.75	14.1332	0.327282	0.0195603	0.598602	0.152388	0.0700939	2.199	4.4926	0.596625
391	Acron_Novgorod_ammonia_I_689	Acron_Novgorod_ammonia_I	Europe_wide	31.2742	58.5256	13.054	0.344471	0.0386052	0.249983	0.339367	0.338482	0.822674	1.08098	0.392011
393	Suez_ammonia_plant_860	Suez_ammonia_plant	Europe_wide	31.3802	31.0549	44.3123	1.2229	0.385993	10.3208	2.08174	1.0425	53.0653	92.0372	0.522307
395	Cherkassy_ammonia_I_661	Cherkassy_ammonia_I	Europe_wide	32.0678	49.3753	10.7748	0.346851	1.24839	1.93321	1.36199	1.29993	3.68761	5.66397	0.36953
398	Konya_430	Konya	Europe_wide	32.5	37.75	27.4123	0.580719	0.0206078	1.01507	0.124225	0.0586987	2.48107	4.34715	0.640458
401	ch_nikodimou_sia_ltd_382	ch_nikodimou_sia_ltd	Europe_wide	33.09	35.06	13.9216	0.504368	0.0620611	0.704101	0.345016	0.188111	2.89559	3.82463	0.47234
405	Dnieprodzerzhinksk_ammonia_II_658	Dnieprodzerzhinksk_ammonia_II	Europe_wide	34.6576	48.488	15.065	0.365626	0.674033	1.41326	0.776058	0.733785	2.62193	4.08458	0.48997
406	Haql_465	Haql	Europe_wide	34.97	29.26	24.1936	0.903282	0.00132813	0.0767669	0.034157	0.0286777	1.61851	1.98578	0.55917
408	Al_Zarqa_Refinery_Hydrogen_Plant_529	Al_Zarqa_Refinery_Hydrogen_Plant	Europe_wide	36.1117	32.1232	7.44994	0.406727	0.117942	0.488929	0.519406	0.407603	1.54748	3.83896	0.312959
409	Dhlail_Sub-District_418	Dhlail_Sub-District	Europe_wide	36.31	32.13	15.1797	0.367469	0.0293959	0.156424	0.393415	0.328933	1.25572	3.44928	0.585225
418	Novomoskovsk_682	Novomoskovsk	Europe_wide	38.1708	54.0839	34.713	0.422728	0.410093	0.718842	0.539898	0.517671	1.71725	2.95062	0.698438
426	Rossosh_ammonia_I_666	Rossosh_ammonia_I	Europe_wide	39.6784	50.1413	18.2482	0.416702	0.0130865	0.430486	0.1985	0.189671	1.86372	3.40936	0.524437
429	Nevinnomyssk_I_684	Nevinnomyssk_I	Europe_wide	41.9515	44.661	32.3887	1.04605	0.0819097	0.520128	0.51827	0.110592	2.35019	4.66694	0.505643
436	Azot_Roustavi_694	Azot_Roustavi	Europe_wide	45.0585	41.5313	11.9728	0.489953	0.154077	1.02738	0.273321	0.232045	6.09631	10.1205	0.473082
440	Al_Qitar_420	Al_Qitar	Europe_wide	47.46	24.21	9.51415	0.423182	0.0311896	0.228373	0.17044	0.11893	0.809875	1.08967	0.34714
441	Khor_Al_Zubair_417	Khor_Al_Zubair	Europe_wide	47.8362	30.1871	54.9549	4.33042	0.0297028	0.201966	0.331958	0.192001	1.63363	4.93	0.52692
442	At_Tawdihiyah_421	At_Tawdihiyah	Europe_wide	47.95	24.22	14.9903	0.502418	0.0048613	0.332355	0.0257346	0.0242759	0.622683	0.91769	0.411146
448	Kuibyshev_ammonia_677	Kuibyshev_ammonia	Europe_wide	49.4533	53.5542	54.0918	0.959362	0.0892806	0.265055	0.39427	0.238064	0.96883	1.75311	0.604176
450	SAFCO_Ibn_Al-Baytar_ammonia_plants_762	SAFCO_Ibn_Al-Baytar_ammonia_plants	Europe_wide	49.5758	27.0728	21.2627	2.05986	0.523859	0.536951	0.946795	0.754347	0.830148	1.20897	0.31908
451	Togliatti_673	Togliatti	Europe_wide	49.6141	53.5437	76.6088	0.921462	0.0585072	0.24657	0.520012	0.372677	0.97776	2.03182	0.744297
452	ZMU_ammonia_nitrate_and_fertilizer_plant_403	ZMU_ammonia_nitrate_and_fertilizer_plant	Europe_wide	49.96	58.53	15.6033	0.247468	0.0193569	0.0901272	0.467947	0.466188	0.915914	1.26681	0.569714
465	Total_South_Pars_Hydrogen_Plant_495	Total_South_Pars_Hydrogen_Plant	Europe_wide	52.195	27.725	8.81669	2.4734	0.00213183	0.322214	0.186563	0.0049134	0.907851	1.97499	0.45378
468	Shiraz_ammonia_I_773	Shiraz_ammonia_I	Europe_wide	52.7361	29.8905	46.3207	1.01816	0.012957	0.950247	0.220843	0.06614	2.91716	5.3886	0.731242
470	Nezami_478	Nezami	Europe_wide	53.17	35.42	8.79195	0.552068	0.00282629	0.219203	0.0115609	0.00535792	0.920146	2.50725	0.409611
475	Salavat_ammonia_plant_674	Salavat_ammonia_plant	Europe_wide	55.9052	53.4002	17.144	0.396528	0.081903	0.332533	0.174187	0.170321	1.07933	2.02775	0.511014
481	Berezniki_ammonia_I_688	Berezniki_ammonia_I	Europe_wide	56.7849	59.4132	34.4968	0.418559	0.0212178	0.138073	0.403897	0.403293	0.618972	0.743161	0.718727
482	Bojnurd_ammonia_plant_777	Bojnurd_ammonia_plant	Europe_wide	57.5108	37.5192	9.98316	0.433329	0.0513898	0.722938	0.0900523	0.07698	2.24496	4.06367	0.403142
489	Tejen_470	Tejen	Europe_wide	60.46	37.36	14.9374	0.436143	0.0133303	0.55187	0.0207109	0.0166762	2.40776	4.22032	0.456775
491	Mary_ammonia_I_663	Mary_ammonia_I	Europe_wide	61.844	37.4848	25.3761	0.503101	0.0284428	0.432877	0.0766686	0.0740038	1.76224	2.92527	0.597297
492	Navoiy_ammonia_I-II_647	Navoiy_ammonia_I-II	Europe_wide	65.3298	40.1114	37.1179	0.843112	0.0111968	1.55856	0.017975	0.0164685	4.47499	7.20856	0.558702
497	Engro_Daharki_Mirpur_Mathelo_Ammonia_Plant_781	Engro_Daharki_Mirpur_Mathelo_Ammonia_Plant	Europe_wide	69.6719	28.0383	28.1371	1.62958	0.514417	4.01908	5.33557	2.8399	15.4225	28.3755	0.349683
1	Dockside_Green_Energy_355	Dockside_Green_Energy	North_America	-123.366	48.4258	7.83309	0.434529	0.086104	0.122228	0.268098	0.128309	0.334821	0.965925	0.317335
14	Abbotsford_136	Abbotsford	North_America	-122.22	49.01	14.7632	0.39681	0.147625	4.46843	0.777911	0.613697	9.34241	10.3507	0.584675
20	KIEFER_LANDFILL_9	KIEFER_LANDFILL	North_America	-121.19	38.51	10.3749	0.417363	0.973299	2.65663	3.22933	2.05569	7.52347	16.2785	0.414424
21	Hilmar_155	Hilmar	North_America	-120.85	37.32	39.77	0.812618	0.128319	7.32337	3.11565	1.53146	25.7274	48.9818	0.684489
22	SYNAGRO_WEST_INC_DBA_CENTRL_VLY_COMPOST_10	SYNAGRO_WEST_INC_DBA_CENTRL_VLY_COMPOST	North_America	-120.55	37.09	27.5087	0.81101	0.0708335	7.171	2.23061	0.617643	23.064	41.608	0.550711
32	Yakima_Valley_Sunnyside_177	Yakima_Valley_Sunnyside	North_America	-120	46.33	39.6667	0.568571	0.0243985	1.84048	0.147986	0.0509368	4.50653	5.98196	0.72981
36	Tulare_159	Tulare	North_America	-119.34	36.09	88.1078	1.6059	0.23582	14.2202	2.25232	0.927839	37.4712	56.4693	0.752412
39	Fallon_172	Fallon	North_America	-118.76	39.4	8.18229	0.235811	0.00882047	0.6711	0.0492207	0.0326833	0.998273	1.35974	0.548633
42	Chino_153	Chino	North_America	-117.56	33.99	24.9842	0.653145	5.90301	9.47885	14.7953	12.9268	19.563	23.0452	0.644811
45	La_Presa_144	La_Presa	North_America	-116.7	32.46	9.66836	0.439752	0.0253427	0.120207	2.40548	0.660615	1.27641	3.35305	0.422855
48	Jerome_Wendell_164	Jerome_Wendell	North_America	-114.57	42.75	67.4122	0.772931	0.0707219	7.42339	0.443133	0.407149	17.2064	24.53	0.770148
51	Wellton_150	Wellton	North_America	-114.07	32.67	19.8152	0.582569	0.00943388	0.376513	0.0878425	0.0831959	2.4658	2.84342	0.624978
53	Oakley_165	Oakley	North_America	-113.92	42.3	28.0469	0.646981	0.00188001	1.60833	0.954152	0.0206805	5.47907	13.8129	0.566334
58	Fort_Saskatchewan_ammonia_plant_and_Redwater_313	Fort_Saskatchewan_ammonia_plant_and_Redwater	North_America	-113.193	53.7257	7.37793	0.258076	0.332718	0.700059	4.18362	4.11347	5.59183	7.62255	0.327578
59	Milford_175	Milford	North_America	-113.14	38.23	13.0184	0.248169	0.00122036	0.838538	0.0268636	0.00864927	2.65807	5.04128	0.603211
60	Redwater_Ammonia_I_311	Redwater_Ammonia_I	North_America	-113.09	53.8425	7.58127	0.268365	3.18479	3.48876	3.99632	3.79997	5.18453	7.02959	0.322397
61	Lethbridge_26	Lethbridge	North_America	-112.8	49.9	55.4166	0.550879	0.0323895	2.6413	0.0890552	0.0783491	6.48767	7.82667	0.782298
62	Delta_174	Delta	North_America	-112.51	39.37	9.0671	0.180816	0.00476118	0.839058	0.143475	0.111188	1.61355	2.36196	0.625083
63	Stanfield_149	Stanfield	North_America	-112	32.9	29.3386	0.566038	0.0207061	0.994603	0.176857	0.129058	2.46734	4.72112	0.723062
74	Culiacancito_140	Culiacancito	North_America	-107.57	24.83	16.4747	0.52533	0.0182808	0.55222	0.0670748	0.0552623	2.86742	5.06295	0.608918
75	Hatch_170	Hatch	North_America	-107.28	32.59	9.3462	0.294812	0.00501006	0.581433	0.13552	0.0302182	2.58836	3.6462	0.505505
76	Vado_171	Vado	North_America	-106.63	32.12	16.255	0.304446	0.114456	3.48592	0.513088	0.24432	5.66164	7.64385	0.677877
78	Delicias_141	Delicias	North_America	-105.42	28.2	22.8496	0.361618	0.0527766	0.468673	0.0560764	0.0554508	0.786089	1.00736	0.767918
84	Greeley_161	Greeley	North_America	-104.55	40.38	58.0566	0.713859	0.0786303	2.41912	0.663076	0.317215	9.2677	15.2365	0.786659
85	Dexter_Rosswell_169	Dexter_Rosswell	North_America	-104.43	33.29	40.7016	0.728037	0.0192741	3.49823	0.0366988	0.0277661	4.60725	6.08244	0.683588
86	Torreon_147	Torreon	North_America	-103.51	25.69	78.3138	1.69669	0.0352929	0.701744	0.0831394	0.0703125	2.10639	4.18098	0.761655
88	Acatic_138	Acatic	North_America	-102.9	20.78	34.7342	1.42441	0.00899109	1.79276	0.190034	0.0855829	4.10248	8.87606	0.523396
89	Eckley_Yuma_160	Eckley_Yuma	North_America	-102.57	40.14	38.4543	0.616397	0.00227608	1.26488	0.0116985	0.00608011	4.47819	9.65485	0.629389
90	Vista_Hermosa_de_Negrete_Los_Charcos_148	Vista_Hermosa_de_Negrete_Los_Charcos	North_America	-102.45	20.26	16.2654	1.1831	0.0157936	0.66288	0.141099	0.0687474	4.78932	8.7507	0.34587
91	Amarillo_34	Amarillo	North_America	-102.4	34.8	58.1258	1.11257	0.00811728	5.72213	0.0212212	0.0149985	15.5255	27.7435	0.585743
92	Jalostotitlan_San_Juan_de_Los_Lagos_143	Jalostotitlan_San_Juan_de_Los_Lagos	North_America	-102.38	21.26	53.0471	2.57787	0.00531945	2.17867	0.0822411	0.023823	7.9974	13.3791	0.546378
96	Great_Plains_Synfuels_Plant_381	Great_Plains_Synfuels_Plant	North_America	-101.836	47.3579	15.1251	0.400554	5.55906	5.71913	5.57299	5.56072	6.27569	7.43143	0.375697
97	North_Dakota_36	North_Dakota	North_America	-101.75	47.45	13.5256	0.416358	5.52136	5.67147	5.62609	5.62364	6.1963	7.53041	0.330535
98	Monclova_185	Monclova	North_America	-101.43	26.88	8.1021	0.406468	0.0113806	0.244127	0.0553525	0.012773	1.00597	2.11673	0.429254
102	Garden_City_166	Garden_City	North_America	-100.84	37.81	44.5939	0.839541	0.0126965	4.40915	0.13899	0.0996565	12.2063	21.2457	0.545647
107	Ezequiel_Montes_142	Ezequiel_Montes	North_America	-99.91	20.68	21.3913	0.659149	0.00896986	1.11091	0.162126	0.0596863	3.3255	6.97602	0.643776
109	Broken_Bow_167	Broken_Bow	North_America	-99.63	41.37	23.9685	0.687993	0.00104391	0.499233	0.0231498	0.00626415	3.75829	8.88269	0.38499
128	Wisner_168	Wisner	North_America	-96.93	41.97	38.4487	0.746714	0.00448486	3.1402	0.0768717	0.0339555	11.7704	21.6118	0.530287
134	Sioux_163	Sioux	North_America	-96.3	43.15	43.7653	0.706822	0.0300998	5.32301	0.198683	0.0500697	17.4328	32.4307	0.595566
175	PCS_Geismar_ammonia_plant_281	PCS_Geismar_ammonia_plant	North_America	-91.0562	30.2198	12.7016	0.463614	14.6985	15.0198	24.7869	24.0027	24.6095	26.1556	0.45563
177	Donaldsonville_Faustina_ammonia_plants_301	Donaldsonville_Faustina_ammonia_plants	North_America	-90.9577	30.0987	18.8175	0.494463	10.9953	11.3007	24.6727	20.1615	20.7566	25.7431	0.588184
179	South_Louisiana_Methanol_Project_240	South_Louisiana_Methanol_Project	North_America	-90.8309	29.9828	10.9594	0.53726	5.93769	6.24569	24.3789	13.1746	13.7768	25.3982	0.371616
184	Yazoo_City_ammonia_I_284	Yazoo_City_ammonia_I	North_America	-90.3802	32.904	7.02108	0.311266	0.463666	0.905145	0.557123	0.493145	1.85256	3.24791	0.344272
214	SOLAR_SOURCES_INC_SHAMROCK_PREPARATION_FACILITY_93	SOLAR_SOURCES_INC_SHAMROCK_PREPARATION_FACILITY	North_America	-87.04	38.44	11.7765	0.45188	0.0311658	2.02233	0.469275	0.205817	6.54493	11.4478	0.373555
227	Royston_162	Royston	North_America	-83.11	34.29	17.7717	0.356819	0.0287029	6.96959	0.374364	0.112662	15.6336	23.0897	0.679369
259	Bridgewater_176	Bridgewater	North_America	-79.01	38.42	17.7973	0.489221	0.0554648	4.19556	0.211148	0.114308	9.00971	13.6606	0.539528
262	North_Carolina_123	North_Carolina	North_America	-78.02	35.1	28.7618	0.703959	0.0225895	18.402	0.217408	0.0862859	46.5646	61.2922	0.547332
272	Moa_172	Moa	North_America	-74.8881	20.6372	9.70057	1.04334	0.0137199	0.0925223	0.0675859	0.033746	0.591092	1.24	0.324797
1	Jorf_Lasfar_22	Jorf_Lasfar	Africa	-8.64	33.06	10.7119	0.317881	0.00252724	0.440029	0.123059	0.115385	1.60164	3.29122	0.447299
2	Bamako_36	Bamako	Africa	-8.02	12.61	23.3674	0.756028	0.174589	0.473619	0.214726	0.192162	1.2044	2.26884	0.534705
5	La_Rabida_Refinery_Hydrogen_Plant_2_85	La_Rabida_Refinery_Hydrogen_Plant_2	Africa	-6.90097	37.1844	6.86787	0.284641	1.03735	1.57175	1.17946	1.11464	2.8356	3.51229	0.309944
6	Puertollano_Ammonia_Plant_176	Puertollano_Ammonia_Plant	Africa	-4.06063	38.6696	5.98406	0.252994	1.58128	2.01028	2.1306	2.00466	4.28734	6.07463	0.329581
10	Arzew_Sofert_ammonia_plants_190	Arzew_Sofert_ammonia_plants	Africa	-0.293053	35.8256	9.28348	0.287985	0.0201777	0.0410992	0.127979	0.079224	0.711164	1.22901	0.401132
21	AMPCO_Methanol_Plant_169	AMPCO_Methanol_Plant	Africa	8.72004	3.78038	8.28363	1.07836	0.0105823	0.0111962	0.0839967	0.0624285	0.0929065	0.171694	0.301069
38	Sasol_Synfuels_220	Sasol_Synfuels	Africa	29.1879	-26.5595	33.2913	0.943325	0.173356	0.68955	0.440131	0.27425	2.23806	5.26642	0.564357
43	Abu_Qir_Ammonia_I_187	Abu_Qir_Ammonia_I	Africa	30.1005	31.2723	18.3408	0.680281	0.599927	3.77973	1.55641	1.1605	18.1494	46.6014	0.352438
45	Delta_Suez_Ammonia_plants_180	Delta_Suez_Ammonia_plants	Africa	31.3995	31.0723	52.105	0.824179	0.385993	10.3208	2.08174	1.0425	53.0653	92.0372	0.644978
47	Ain_Sukhna_I_183	Ain_Sukhna_I	Africa	32.3009	29.6283	14.6125	0.409	0.001196	0.0200099	0.262296	0.0300256	0.280158	1.10595	0.511728
48	Omdurman_8	Omdurman	Africa	32.45	15.6	29.1043	0.622843	1.84827	2.32282	4.88786	3.00173	4.2912	7.7863	0.641708
70	SAFCO_Samad_Ibn_Al-Baytar_ammonia_plants_194	SAFCO_Samad_Ibn_Al-Baytar_ammonia_plants	Africa	49.5758	27.0728	39.9113	0.703173	0.523859	0.536951	0.946795	0.754347	0.830148	1.20897	0.677548
78	Isfahan_Refinery_Hydrogen_Plant_104	Isfahan_Refinery_Hydrogen_Plant	Africa	51.5071	32.7811	5.82966	0.241754	0.0687796	0.470167	0.575001	0.45442	1.59299	3.22242	0.415236
79	QAFCO_1_200	QAFCO_1	Africa	51.5675	24.9207	7.73003	0.428348	0.117159	0.139077	4.37138	0.52074	0.738304	4.75262	0.337523
82	Shiraz_Ammonia_I_205	Shiraz_Ammonia_I	Africa	52.7361	29.8905	40.1856	0.643	0.012957	0.950247	0.220843	0.06614	2.91716	5.3886	0.705432
98	OMIFCO_Ammonia_I_201	OMIFCO_Ammonia_I	Africa	59.4264	22.6392	14.2071	0.406087	0.00077848	0.00815079	0.0952441	0.0868636	0.226142	0.253778	0.546314
6	NorthofAlmaty_0	NorthofAlmaty	China	76.8	43.47	19.16	0.455793	0.00421337	0.0462171	0.306767	0.0844305	0.302673	1.0889	0.611343
28	Kuitun_Ammonia_Plant_505	Kuitun_Ammonia_Plant	China	84.9033	44.4265	38.9142	0.865178	0.0247645	1.51368	0.150137	0.0890807	6.49581	11.1881	0.664684
32	Kemerovo_Ammonia_I_203	Kemerovo_Ammonia_I	China	86.0623	55.345	13.3356	0.292075	0.0839311	0.152924	0.412551	0.390599	0.816197	1.26566	0.518151
33	Xinjiang_Tianfu_Shihezi_Ammonia_Plant_286	Xinjiang_Tianfu_Shihezi_Ammonia_Plant	China	86.0731	44.358	16.5178	0.60501	0.0252822	2.09175	0.143561	0.0880286	7.67852	12.0052	0.448029
34	Xinjiang_Xinlianxin_Ammonia_Plant_392	Xinjiang_Xinlianxin_Ammonia_Plant	China	86.264	44.3039	18.769	0.635171	0.0295192	2.26595	0.159146	0.0924211	7.03426	12.2106	0.479471
37	Yankuang_Changji_SNG_Plants_415	Yankuang_Changji_SNG_Plants	China	87.2082	44.1612	19.9339	0.818379	0.0670181	3.75359	0.285703	0.198609	11.3449	16.179	0.408334
39	Huadian_Changji_Ammonia_Plant_406	Huadian_Changji_Ammonia_Plant	China	87.3582	44.0612	29.5541	0.85642	0.0570158	3.30151	0.290186	0.196061	11.3259	16.1799	0.534532
41	Xinye_Wuijiaqu_Methanol_Plant_317	Xinye_Wuijiaqu_Methanol_Plant	China	87.5379	44.1824	30.1656	0.740519	0.059813	3.46667	0.241615	0.167532	9.41969	13.5663	0.579965
47	Wucaiwan_49	Wucaiwan	China	89.19	44.92	30.3358	0.669413	0.00285495	0.00285495	0.0190558	0.00953316	0.00953316	0.0190558	0.610852
52	Abakan_83	Abakan	China	91.03	53.73	10.4053	0.229059	0.00139967	0.083412	0.0590275	0.0572865	0.540288	1.03809	0.553093
58	ChaerhanSaltLake_29	ChaerhanSaltLake	China	95.32	36.73	9.24676	0.359575	0.00612342	0.215243	0.0280435	0.0162742	0.478809	0.809398	0.37001
60	Qinghai_Yanhu_519	Qinghai_Yanhu	China	97.0088	32.9931	3.0686	0.158408	0.0108994	0.449741	0.0664071	0.0403884	1.23644	2.09757	0.428655
61	Haixi_MTO_Plant_243	Haixi_MTO_Plant	China	97.3858	37.332	13.8235	0.435248	0.00591398	0.382316	0.02323	0.0161318	0.912533	1.10293	0.469672
67	Yuxi_Ammonia_Plant_362	Yuxi_Ammonia_Plant	China	102.547	24.352	15.9641	5.26294	0.058507	1.53736	0.532591	0.27479	7.11466	13.6893	0.301525
68	Jiangsu_Huachang_Ammonia_Plant_407	Jiangsu_Huachang_Ammonia_Plant	China	102.556	31.8754	33.6712	14.3742	0.0357953	0.280717	0.249242	0.125626	1.01565	2.06354	0.473374
70	Yiliang_52	Yiliang	China	103.18	24.99	15.9479	1.37239	0.0810435	2.10746	0.57151	0.301057	8.03348	15.0647	0.500979
71	Kaiyuan_50	Kaiyuan	China	103.26	23.75	14.8997	1.57795	0.0466681	1.10526	0.524079	0.209326	5.1107	12.5368	0.374369
72	Yongjing_68	Yongjing	China	103.27	36.01	13.4338	0.518562	0.0462548	1.51224	0.373687	0.174695	6.27304	12.8692	0.429616
74	Dongpo_32	Dongpo	China	103.8	30.04	17.0044	1.36467	0.152213	3.91561	1.34439	0.688424	17.1663	34.0283	0.302632
76	Wutongqiao_74	Wutongqiao	China	103.81	29.45	21.5389	1.34598	0.156585	3.68036	1.46381	0.602279	13.7611	33.2071	0.438448
84	Xingyi-Qianxinan_11	Xingyi-Qianxinan	China	104.88	25.21	19.268	0.966584	0.143991	2.93227	0.943103	0.433399	8.68287	18.1382	0.516357
90	Ningxia_Baofeng_Methanol_Plant_241	Ningxia_Baofeng_Methanol_Plant	China	106.063	38.4797	30.214	0.975973	0.111891	3.79975	0.497987	0.268615	8.79957	16.2674	0.498582
94	Shizuishan_27	Shizuishan	China	106.43	38.94	33.6952	0.862534	0.0538993	1.88847	0.375205	0.213256	6.98191	12.0382	0.596637
99	Juitai_Energy_Ordos_MEG_Plant_247	Juitai_Energy_Ordos_MEG_Plant	China	106.704	39.4724	18.1601	0.856995	0.0143588	0.36126	0.147328	0.0466394	1.05009	4.11201	0.36009
100	Xiaozhaibazhen_10	Xiaozhaibazhen	China	106.72	27.18	32.2892	1.22657	0.126937	2.1825	0.918722	0.484263	8.46177	16.6547	0.653843
105	Xukuang_Baoji_Methanol_Plant_380	Xukuang_Baoji_Methanol_Plant	China	107.238	34.362	9.63734	0.683983	0.129401	2.44169	0.700542	0.442377	8.24981	12.4016	0.322187
106	Jizhong_Bayannur_Ammonia_Plant_279	Jizhong_Bayannur_Ammonia_Plant	China	107.388	40.7432	18.6585	0.561668	0.0360886	1.59069	0.27491	0.170831	7.48085	12.1697	0.453049
117	Wulashan_26	Wulashan	China	108.73	40.68	13.3045	0.610162	0.0277403	1.06065	0.143871	0.0863146	3.53658	5.80975	0.344573
122	ChinaCoal_Fertlizer_Plant_462	ChinaCoal_Fertlizer_Plant	China	109.376	39.0881	10.9497	0.614626	0.00939066	0.220447	0.130806	0.0479533	0.928258	2.23921	0.351597
129	Baotou_72	Baotou	China	109.68	40.66	20.9361	0.578943	0.0449945	1.79612	0.223	0.13017	5.66419	9.36268	0.528345
134	Shenhua_Baotou_MEG_Plant_88	Shenhua_Baotou_MEG_Plant	China	109.84	40.658	22.4752	0.565965	0.045361	1.82778	0.240113	0.134765	5.78394	10.0812	0.561546
141	Shenhua_Yulin_MEG_Plants_94	Shenhua_Yulin_MEG_Plants	China	110.181	22.654	14.7379	1.56909	0.13645	3.82405	1.14081	0.567994	14.0061	26.1209	0.37776
143	Sanwei_Neimenggu_Methanol_Plant_508	Sanwei_Neimenggu_Methanol_Plant	China	110.2	39	10.9521	0.534114	0.0657336	1.15527	0.318504	0.196085	3.82184	6.27687	0.336945
144	Sunjiachazhen_77	Sunjiachazhen	China	110.36	39.15	17.3884	0.494017	0.0481922	1.23072	0.33813	0.164612	3.85802	8.21853	0.523254
147	Shanxi_Aluminum_Plant_310	Shanxi_Aluminum_Plant	China	110.664	35.6527	15.1709	0.977109	0.103216	1.99332	0.895994	0.416936	7.99372	17.1631	0.354147
148	Linyi_Ammonia_Plant_302	Linyi_Ammonia_Plant	China	110.748	35.1218	24.7945	1.0751	0.202896	4.2156	1.15915	0.591278	12.0025	26.4749	0.507894
150	Jishan_Ammonia_Plant_386	Jishan_Ammonia_Plant	China	110.983	35.604	17.8982	0.986798	0.183345	3.68221	1.04308	0.571803	11.2396	19.8419	0.415454
155	Chuxing_Yichang_Ammonia_Plant_113	Chuxing_Yichang_Ammonia_Plant	China	111.451	30.4758	45.8472	1.30403	0.14928	3.06472	0.958901	0.494034	9.52129	16.5234	0.58426
156	Hubei_Yihua_Ammonia_Plant_118	Hubei_Yihua_Ammonia_Plant	China	111.65	30.3904	39.044	1.0171	0.157361	3.30074	1.00122	0.503935	10.6316	20.3937	0.589701
159	Nailun_Hohhot_Ammonia_Plant_294	Nailun_Hohhot_Ammonia_Plant	China	111.747	40.7168	19.9018	0.551255	0.0635264	2.85062	0.275665	0.180068	7.76896	12.0763	0.496498
160	Tianye_Huhehaote_Ammonia_Plant_403	Tianye_Huhehaote_Ammonia_Plant	China	111.749	40.8426	21.9636	0.56301	0.0474292	1.88863	0.269559	0.159713	6.81005	11.8243	0.518542
161	Sinopec_Zhijiang_611	Sinopec_Zhijiang	China	111.75	30.4167	24.0588	0.982977	0.129864	2.89521	0.977333	0.500472	11.1627	20.8066	0.407864
169	Jiaocheng_42	Jiaocheng	China	112.2	37.58	14.4847	0.755231	0.148331	2.5419	0.836812	0.439514	7.74659	14.6733	0.425171
170	Hujizhen-Shuanghe-Linkuang_14	Hujizhen-Shuanghe-Linkuang	China	112.27	31.33	20.9718	1.06649	0.0937246	2.34053	0.886774	0.422166	8.66084	18.989	0.362868
171	Yangquan_Qingxu_Ammonia_Plant_367	Yangquan_Qingxu_Ammonia_Plant	China	112.359	37.6074	11.6988	0.699569	0.181259	3.46946	0.867758	0.487563	8.80715	15.255	0.38308
175	Taiyuan_Ammonia_Plant_304	Taiyuan_Ammonia_Plant	China	112.48	37.779	11.615	0.632127	0.145289	2.64012	0.836947	0.426041	7.43459	14.7782	0.409066
176	Xianxiang_19	Xianxiang	China	112.5	27.74	16.7953	0.800332	0.116154	2.47589	0.995892	0.518622	11.0094	21.3371	0.429942
196	Hubei_Shuanghuan_Chemical_613	Hubei_Shuanghuan_Chemical	China	113.567	30.9333	40.5167	1.36352	0.118578	3.00219	1.11449	0.571023	13.9434	25.681	0.470127
199	Henan_Zhongxin_Chemical_Works_534	Henan_Zhongxin_Chemical_Works	China	113.667	35.2667	36.0799	1.37112	0.170358	9.3184	1.44287	0.759088	38.975	70.8649	0.459857
201	Haohua_Zhumadian_Ammonia_Phase_1_272	Haohua_Zhumadian_Ammonia_Phase_1	China	114.04	32.9833	23.1961	1.37978	0.250672	11.7667	1.62971	0.827896	38.6855	74.4303	0.300079
208	Henan_Jinkai_531	Henan_Jinkai	China	114.3	34.8	30.5678	1.36604	0.238434	13.4322	1.68367	0.824303	45.6708	93.8582	0.368836
209	Hebei_Yangmei_Zhengyuan_Ammonia_Plant_402	Hebei_Yangmei_Zhengyuan_Ammonia_Plant	China	114.378	38.3064	21.2096	1.02769	0.291281	8.37104	1.6455	0.876981	24.0919	43.9531	0.362077
219	Linquan_7	Linquan	China	115.28	33.07	26.7915	1.40256	0.163349	4.74863	1.66625	0.828017	28.2584	59.526	0.344367
224	Anhui_Haoyuan_Chemical_528	Anhui_Haoyuan_Chemical	China	115.817	32.9	26.2539	1.51086	0.242116	5.4659	1.61237	0.806813	17.8649	35.9108	0.349644
231	Dongping_Ammonia_Phase_II_333	Dongping_Ammonia_Phase_II	China	116.42	35.98	24.7614	1.2153	0.287844	8.51099	1.92959	0.959337	28.6349	59.7366	0.313899
236	Fengxian_22	Fengxian	China	116.6	34.76	27.3782	1.42866	0.262616	5.41075	1.97939	1.05343	24.3103	47.1958	0.336088
240	Huaihua_Anhui_Ammonia_Plant_485	Huaihua_Anhui_Ammonia_Plant	China	116.96	32.61	25.0168	1.30787	0.219005	4.15191	1.53324	0.740502	14.395	30.5446	0.376661
254	Zhangzhou_84	Zhangzhou	China	117.69	24.51	10.3434	0.57042	0.177376	3.91534	0.994193	0.526863	10.3313	15.8451	0.390267
258	Jiutai_Linyi_MEG_Plant_252	Jiutai_Linyi_MEG_Plant	China	118.258	35.0218	29.5976	1.51622	0.297985	9.11348	2.05683	0.995213	27.8542	53.8594	0.380782
261	Linyi_Methanol_Plant_365	Linyi_Methanol_Plant	China	118.356	35.1047	31.4604	1.4149	0.298608	9.38095	2.02474	0.993254	27.4157	52.9214	0.404851
262	Linyi_35	Linyi	China	118.47	34.94	36.6272	1.42222	0.205003	5.60565	2.17497	1.08623	26.7616	53.0464	0.463126
270	Shouguang_36	Shouguang	China	118.81	36.93	27.2532	1.1522	0.181427	4.94992	1.54281	0.873446	24.6187	42.8242	0.355158
280	Hulunbeier_Ammonia_Plant_539	Hulunbeier_Ammonia_Plant	China	119.716	49.2116	14.8223	0.356149	0.0288369	1.16026	0.10321	0.0733513	2.69724	3.29635	0.460297
301	Mulituzhen_24	Mulituzhen	China	122.24	43.46	15.1474	0.484912	0.0130081	0.759914	0.1233	0.0586411	3.20784	5.53452	0.391823
302	Tongliao_GEM_I_256	Tongliao_GEM_I	China	122.243	43.6529	14.6212	0.504587	0.0171647	1.12714	0.135732	0.0721233	3.74168	6.40826	0.362331
304	Hongyu_Zalantun_Ammonia_Plant_313	Hongyu_Zalantun_Ammonia_Plant	China	122.763	47.9959	11.5167	0.411362	0.0238754	0.814785	0.172233	0.0793673	2.82817	6.13167	0.363627
305	HulanErgi_17	HulanErgi	China	123.67	47.19	13.5753	0.436498	0.0604759	2.15539	0.27894	0.160612	5.74714	9.89003	0.357968
306	Changshan_20	Changshan	China	124.52	45.32	12.3537	0.517348	0.0476157	2.19195	0.316301	0.164657	7.66512	14.0189	0.308785
307	Daqing_Oxochemicals_Plant_640	Daqing_Oxochemicals_Plant	China	125.05	46.5833	16.4106	0.442108	0.047418	1.17651	0.303076	0.152008	4.16782	9.30108	0.402617
308	Anju_66	Anju	China	125.65	39.62	14.7399	0.462385	0.804055	2.57283	6.01252	2.9397	8.89503	16.4408	0.470464
315	Yochon_Oxochemicals_Plant_616	Yochon_Oxochemicals_Plant	China	126.891	35.8052	13.3068	0.674618	0.402809	0.402809	1.02511	0.683732	0.683732	1.02511	0.320021
317	Anseong-Icheon_1	Anseong-Icheon	China	127.42	37.12	33.5153	0.544297	0.245518	0.245518	2.3429	1.03736	1.03736	2.3429	0.702011
334	Marifu_Refinery_Hydrogen_Plant_138	Marifu_Refinery_Hydrogen_Plant	China	132.242	34.2021	8.90688	0.742152	0.489304	0.910131	2.11426	1.62948	3.01094	5.76844	0.384939
356	Hirono_IGCC_345	Hirono_IGCC	China	141.019	37.2366	27.8015	3.85562	0.0664519	0.286121	0.657538	0.297061	1.4545	3.61644	0.622921
3	Engro_Daharki_Mirpur_Mathelo_Ammonia_Plants_76	Engro_Daharki_Mirpur_Mathelo_Ammonia_Plants	India	69.6719	28.0383	28.1371	1.62958	0.514417	4.01908	5.33557	2.8399	15.4225	28.3755	0.349683
5	Fatima_Sadiqabad_Machhi_Ammonia_Plants_50	Fatima_Sadiqabad_Machhi_Ammonia_Plants	India	70.0305	28.2616	30.8738	1.67467	0.617978	3.43402	5.87325	3.0623	15.7917	26.5393	0.355794
10	Thal_I_83	Thal_I	India	72.8717	18.7025	20.5696	1.6404	1.85208	3.00566	17.2435	4.1228	7.83949	25.0196	0.484715
11	Trombay_V_84	Trombay_V	India	72.8871	19.0413	19.4158	1.98352	7.16782	8.00255	20.7735	15.5095	19.7172	29.2401	0.378218
13	Salav_DRI_Plant_55	Salav_DRI_Plant	India	72.9476	18.5303	13.9147	2.04563	0.502386	1.27144	10.2403	2.03111	6.38478	19.018	0.315012
14	Ankleshwar_5	Ankleshwar	India	72.99	21.58	24.4109	2.40701	1.16676	5.92565	8.39036	3.12436	17.1317	35.5623	0.406689
15	Narmada_Ammonia_Methanol_Plant_130	Narmada_Ammonia_Methanol_Plant	India	73.0076	21.7356	20.4814	2.82271	0.835983	4.00858	8.85182	3.41438	18.0218	37.8342	0.308932
16	JSW_Dolvi_DRI_61	JSW_Dolvi_DRI	India	73.0345	18.6878	30.9942	2.74663	1.59975	3.13727	15.0599	4.77635	10.7084	26.4481	0.474179
17	Taloja_Ammonia_Plant_105	Taloja_Ammonia_Plant	India	73.1361	19.0679	46.8683	3.39513	3.78512	5.15049	23.8303	17.6447	24.4797	37.801	0.618867
18	Vadodara_Ammonia_Plant_106	Vadodara_Ammonia_Plant	India	73.1516	22.3737	35.9198	1.33511	1.21903	4.82584	14.8383	8.02365	24.7053	48.1025	0.614825
21	Zuari_Ammonia_Plant_78	Zuari_Ammonia_Plant	India	73.8732	15.3748	13.2897	1.25013	0.637849	1.04614	3.15038	1.66096	4.39105	8.26365	0.460459
36	Namakkal_1	Namakkal	India	78.16	11.24	42.4036	39.2595	0.979117	3.77465	11.4413	5.46304	20.6402	43.1651	0.403461
38	Hyderabad_0	Hyderabad	India	78.49	17.41	40.805	4.48399	2.48294	7.32497	9.0286	5.51468	21.0312	38.9167	0.662267
45	Bikkavolu_Balabhadhrapuram_7	Bikkavolu_Balabhadhrapuram	India	81.99	16.96	30.2289	2.97075	1.58494	2.88374	10.9874	6.79557	14.0187	25.9329	0.433672
63	Chaerhan_Salt_Lake_4	Chaerhan_Salt_Lake	India	95.32	36.73	9.24676	0.359575	0.00612342	0.215243	0.0280435	0.0162742	0.478809	0.809398	0.37001
1	Panama_Urea_Fertilizer_Plant_98	Panama_Urea_Fertilizer_Plant	South_America	-79.5188	8.99427	13.5253	3.01792	0.133615	0.789916	0.266183	0.189362	1.86704	2.26069	0.37731
2	Pacanguilla_10	Pacanguilla	South_America	-79.47	-7.19	38.0706	2.0865	0.00754583	0.284724	0.1522	0.020392	0.965639	2.91066	0.628461
15	Majes_9	Majes	South_America	-72.2	-16.36	26.1271	0.785522	0.000255744	0.0432531	0.00486777	0.00196279	0.25419	0.757339	0.768273
17	La_Manga_1	La_Manga	South_America	-71.59	-33.9	19.9231	0.975699	0.0134098	1.85672	0.190984	0.0843278	4.90332	7.98014	0.382896
18	Las_Chacras_2	Las_Chacras	South_America	-71.57	-34.23	19.9421	0.959545	0.00802743	0.728874	0.161274	0.0495726	3.79706	8.57045	0.379067
22	Cardon_Refinery_Hydrogen_Plant_35	Cardon_Refinery_Hydrogen_Plant	South_America	-70.223	11.6295	34.1701	2.8683	0.431289	0.627774	0.458924	0.443702	0.940071	1.75236	0.417828
29	Cochabamba_0	Cochabamba	South_America	-66.25	-17.4	9.38982	0.753417	0.172958	0.462775	0.224325	0.206716	1.00327	1.45478	0.579
35	Point_Lisas_ammonia_plants_73	Point_Lisas_ammonia_plants	South_America	-61.4767	10.3824	16.5969	1.6266	0.452908	3.66183	1.40298	1.15518	9.21311	12.9101	0.318685
46	Duque_de_Caxias_Refinery_Hydrogen_Plant_40	Duque_de_Caxias_Refinery_Hydrogen_Plant	South_America	-43.2643	-22.7219	11.8278	0.850214	2.26892	2.74602	9.66884	6.35239	8.55924	13.4957	0.424787
51	Sergipe_Ammonia_Plant_89	Sergipe_Ammonia_Plant	South_America	-37.1432	-10.771	17.8402	0.902507	0.0381094	0.463549	0.675667	0.47243	2.68703	5.71505	0.438545
6	Asean_Aceh_Fertilizer_Plant_92	Asean_Aceh_Fertilizer_Plant	South_East_Asia	97.027	5.24652	9.01688	0.76632	0.56769	1.66889	3.50665	2.92476	8.01627	11.482	0.410041
7	Thung_Luang_Chom_Bueng_4	Thung_Luang_Chom_Bueng	South_East_Asia	99.69	13.39	20.8311	0.985685	1.26675	3.54648	5.7572	3.21707	9.19482	17.6497	0.362779
8	Sungai_Jawi_1	Sungai_Jawi	South_East_Asia	100.48	5.22	9.59458	0.574673	0.923967	2.88553	4.33257	2.35248	8.13976	13.6038	0.438036
28	Palembang_18	Palembang	South_East_Asia	104.71	-2.83	58.7546	2.19514	0.84676	3.64187	4.61452	2.44465	16.7172	30.0828	0.575188
30	Pusri_IB_95	Pusri_IB	South_East_Asia	104.806	-2.97587	49.1038	2.3336	1.01653	5.46138	4.72831	2.5557	17.3903	32.1831	0.501462
32	Xingyi_Qianxinan_7	Xingyi_Qianxinan	South_East_Asia	104.88	25.21	15.4347	0.468386	0.143991	2.93227	0.943103	0.433399	8.68287	18.1382	0.447734
45	Kujang_Ammonia_Plants_83	Kujang_Ammonia_Plants	South_East_Asia	107.429	-6.40623	33.3341	0.775047	4.54935	8.75298	24.6454	13.188	26.8615	50.1917	0.693805
47	Liuzhou_Chemical_132	Liuzhou_Chemical	South_East_Asia	109.383	24.3167	10.4034	0.461642	0.105599	2.58654	0.714455	0.335219	7.64289	16.1437	0.349196
51	Blitar_City_0	Blitar_City	South_East_Asia	112.05	-8.02	23.8626	1.43116	2.85691	5.77931	17.2309	11.275	22.5184	38.5852	0.384445
52	Gresik_Ammonia_Plant_91	Gresik_Ammonia_Plant	South_East_Asia	112.638	-7.1525	29.3947	0.813203	2.31516	4.11123	12.877	8.27221	16.0259	25.4818	0.545642
61	Kaltim_Parna_Ammonia_Plant_84	Kaltim_Parna_Ammonia_Plant	South_East_Asia	117.496	0.176768	44.7448	1.73959	0.198037	0.343008	1.59656	0.519302	1.12013	2.97732	0.665994
1	mindarra_farm_1	mindarra_farm	Australia	115.92	-31.17	7.9681	0.406662	0.000333619	0.160646	0.00648709	0.00135907	0.765307	1.64078	0.34703
12	rivalea_australia_corowa_6	rivalea_australia_corowa	Australia	146.33	-35.97	9.0185	0.358951	0.00127492	0.351326	0.0330838	0.017249	1.63318	2.82694	0.332894
13	riverina_feedlot_7	riverina_feedlot	Australia	146.48	-34.64	14.2175	0.385176	0.00181927	0.255196	0.0133622	0.0077204	1.25991	2.404	0.477025
15	yallambee_feedlot_9	yallambee_feedlot	Australia	147.48	-35.21	7.42133	0.321633	0.00758282	0.60143	0.0218292	0.0158606	1.81923	3.24231	0.322392
19	australian_country_choice_pty_ltd_acc_feedlot_13	australian_country_choice_pty_ltd_acc_feedlot	Australia	148.96	-26.26	7.09257	0.70178	3.85134e-05	0.198212	0.00471085	0.000372955	0.869376	1.69568	0.301568
23	wallumba_feedlot_16	wallumba_feedlot	Australia	150.24	-26.84	11.5554	0.649111	0.000207785	0.135967	0.0193232	0.0184242	0.768427	1.39866	0.390904
27	killara_feedlot_20	killara_feedlot	Australia	150.59	-31.47	9.4237	0.599228	0.000552208	0.191556	0.0182781	0.00260394	0.947671	2.36443	0.362286
32	whyalla_feedlot_25	whyalla_feedlot	Australia	151.05	-28.75	16.0126	0.567906	0.000130313	0.0965713	0.00211541	0.000961072	0.588059	1.93902	0.561007
35	sandalwood_feedlot_28	sandalwood_feedlot	Australia	151.43	-27.14	13.9539	1.17149	0.00564365	0.135763	0.0645459	0.0100403	0.807206	2.46949	0.341597
38	kerwee_feedlot_30	kerwee_feedlot	Australia	151.55	-27.39	14.5802	1.09663	0.00286989	0.209371	0.0955121	0.0613057	1.57755	2.62756	0.333455
40	rangers_valley_feedlot_33	rangers_valley_feedlot	Australia	151.73	-29.51	7.67082	0.466157	0.000274975	0.215669	0.006905	0.00141745	0.779737	1.70396	0.331183
46	Kapuni_Ammonia_Plant_41	Kapuni_Ammonia_Plant	Australia	174.165	-39.4766	13.407	0.514922	0.00463106	1.15161	0.0310678	0.00698627	2.54476	4.00709	0.364844
8	Thung_Luang_Chom_Bueng	99.69												13.39
9	Sungai_Jawi	100.48												5.22
22	Yiliang	103.18												24.99
23	Kaiyuan	103.26												23.75
28	Wutongqiao	103.81												29.45
29	Panjiangzhen_Yanfangxiang	103.92												25.78
33	Palembang	104.71												-2.83
35	Pusri_IB	104.806												-2.97587
37	Xingyi_Qianxinan	104.88												25.21
47	Xiaozhaibazhen	106.72												27.18
51	Kujang_Ammonia_Plants	107.429												-6.40623
52	Fujing_Ammonia_Plant	107.5												29.5647
54	Liuzhou_Chemical	109.383												24.3167
58	Blitar_City	112.05												-8.02
59	Xianxiang	112.5												27.74
60	Gresik_Ammonia_Plant	112.638												-7.1525
70	Kaltim_Parna_Ammonia_Plant	117.496												0.176768
72	Zhangzhou	117.69												24.51
1	Gresik_Ammonia_Plant	112.638												-7.1525
3	mindarra_farm	115.92												-31.17
14	rivalea_australia_corowa	146.33												-35.97
15	riverina_feedlot	146.48												-34.64
17	yallambee_feedlot	147.48												-35.21
21	australian_country_choice_pty_ltd_acc_feedlot	148.96												-26.26
25	wallumba_feedlot	150.24												-26.84
29	killara_feedlot	150.59												-31.47
34	whyalla_feedlot	151.05												-28.75
37	sandalwood_feedlot	151.43												-27.14
40	kerwee_feedlot	151.55												-27.39
42	rangers_valley_feedlot	151.73												-29.51
48	Kapuni_Ammonia_Plant	174.165												-39.4766

## Sheet: IASI_A
index	code_name	Name	region_IASI_A	lon	lat	Emission_IASI_A	Emission_uncertainty_IASI_A	HTAPv2_no_agri_0.500.25	HTAPv2_0.500.25	HTAPv2_no_agri_1.001.00	HTAPv2_no_agri_1.000.50	HTAPv2_1.000.50	HTAPv2_1.001.00	corr_x_IASI_A
1	quinta_da_senhora_da_luz_11	quinta_da_senhora_da_luz	Europe_wide	-8.98	39.34	9.66108	0.374434	0.0713148	0.697036	0.598658	0.322105	2.95416	5.16357	0.318354
3	intergados_vicente_nobre_13	intergados_vicente_nobre	Europe_wide	-8.87	39.28	9.56435	0.346112	0.118659	1.01767	0.64264	0.307983	2.89266	5.20391	0.338902
26	finca_ca_ada_de_ronquera_33	finca_ca_ada_de_ronquera	Europe_wide	-5.7	37.42	5.88264	0.219586	0.110315	1.8746	0.483581	0.303339	5.04913	8.08667	0.380056
32	El_Viso_Pozoblanco_423	El_Viso_Pozoblanco	Europe_wide	-4.89	38.43	11.4123	0.299356	0.0484954	0.357587	0.213529	0.12115	1.45454	2.97268	0.487659
36	Menasalbas_425	Menasalbas	Europe_wide	-4.26	39.64	10.6451	0.296321	0.0335854	1.05619	0.334961	0.124112	4.0365	8.50982	0.462489
37	Puertollano_ammonia_plant_723	Puertollano_ammonia_plant	Europe_wide	-4.06063	38.6696	7.94914	0.286482	1.58128	2.01028	2.1306	2.00466	4.28734	6.07463	0.376796
71	Canovas_422	Canovas	Europe_wide	-1.26	37.74	24.4971	0.417214	0.0471831	1.003	0.815166	0.656492	3.71685	6.75794	0.649695
73	carnicas_75	carnicas	Europe_wide	-1.13	37.99	11.3165	0.353948	0.0922772	1.43155	0.880262	0.240131	4.13439	7.15646	0.427581
75	eclosion_sas_78	eclosion_sas	Europe_wide	-1.05	47.08	11.8408	0.392544	0.0692562	1.37417	0.534143	0.278686	5.97149	11.4496	0.352397
85	Arzew_Sofert_Ammonia_Plants_580	Arzew_Sofert_Ammonia_Plants	Europe_wide	-0.340962	35.8059	13.7471	0.440212	0.0345133	0.190793	0.12509	0.0767855	0.612447	1.12034	0.400885
92	sat_la_vall_de_soses_91	sat_la_vall_de_soses	Europe_wide	0	42	13.7249	0.555727	0.168699	2.28079	0.277152	0.227753	5.85447	8.40541	0.328713
96	lleidacamp_98	lleidacamp	Europe_wide	0.42	41.8	23.9112	0.566231	0.0408727	2.49197	0.382251	0.281769	7.34505	11.2377	0.543846
98	cal_muntany_s_sat_1058_99	cal_muntany_s_sat_1058	Europe_wide	1	42	13.9349	0.421165	0.0233335	2.90452	0.201206	0.0757277	7.48367	11.5582	0.436382
113	ursa_benelux_114	ursa_benelux	Europe_wide	3.36	50.89	16.2484	0.539646	0.200901	7.97111	1.73088	0.69407	19.8655	28.3261	0.379778
175	Brunsbuttel_Ammonia_Plant_849	Brunsbuttel_Ammonia_Plant	Europe_wide	9.21377	53.9113	13.0852	0.435513	0.0318194	2.46529	0.358667	0.125241	8.83583	19.8378	0.326993
180	saintgobain_isover_italia_spa_182	saintgobain_isover_italia_spa	Europe_wide	9.63	45.52	15.8792	0.793923	0.218154	8.70953	1.17027	0.761136	29.1893	44.0864	0.339926
187	Gadesco_Pieve_CHP_812	Gadesco_Pieve_CHP	Europe_wide	10.12	45.15	19.5297	0.632942	0.0896933	7.77056	1.04623	0.513308	41.4548	58.0951	0.453508
193	sia_societ_industria_agglomerati_srl_191	sia_societ_industria_agglomerati_srl	Europe_wide	10.52	44.92	12.4878	0.5545	0.165383	5.98346	1.08721	0.532069	22.4806	57.0851	0.335489
198	Sapio_Mantua_Hydrogen_Plant_488	Sapio_Mantua_Hydrogen_Plant	Europe_wide	10.8489	45.1438	13.341	0.525808	0.132121	9.25073	1.09785	0.533269	37.3281	54.5388	0.371848
212	lagerhaus_klein_wanzleben_gmbh_cokg_208	lagerhaus_klein_wanzleben_gmbh_cokg	Europe_wide	11.55	51.85	12.438	0.401092	0.0351919	0.455138	0.755848	0.115201	2.72774	8.06603	0.367465
277	Kutina_ammonia_plant_698	Kutina_ammonia_plant	Europe_wide	16.8009	45.4679	10.052	0.333069	0.836248	1.27666	1.21825	1.02403	3.99606	7.18217	0.413044
291	janikowskie_zak_ady_sodowe_janikosoda_sa_279	janikowskie_zak_ady_sodowe_janikosoda_sa	Europe_wide	18.1	52.75	9.18248	0.312126	0.0165413	0.90021	0.201842	0.0499517	3.15917	8.21445	0.334643
295	Kedzierzyn_Ammonia_Plant_714	Kedzierzyn_Ammonia_Plant	Europe_wide	18.2499	50.3162	12.2361	0.345049	0.0369548	0.851565	0.702545	0.208557	3.04598	6.76731	0.430527
306	Marsa_el_Brega_ammonia_I_745	Marsa_el_Brega_ammonia_I	Europe_wide	19.5989	30.4008	11.0894	0.319894	0.00114754	0.0488921	0.00128397	0.00117673	0.149438	0.201673	0.46698
309	Biezun_419	Biezun	Europe_wide	19.88	52.97	11.2979	0.327254	0.00827266	0.886242	0.102146	0.0474116	4.48513	8.80094	0.390927
312	Pancevo_Ammonia_Plant_699	Pancevo_Ammonia_Plant	Europe_wide	20.6646	44.8436	5.90307	0.246742	0.182341	0.827142	0.46471	0.33488	4.639	7.2855	0.311879
318	Pulawy_Azoty_I_713	Pulawy_Azoty_I	Europe_wide	21.9853	51.4577	22.6727	0.426874	0.0196214	0.658529	0.146947	0.0735872	3.32751	7.06733	0.561582
333	sc_ghcl_upsom_romania_sa_319	sc_ghcl_upsom_romania_sa	Europe_wide	23.86	46.39	4.21235	0.212533	0.0897955	0.677042	0.649415	0.317966	2.63878	5.72418	0.312565
334	Grodno_ammonia_3_697	Grodno_ammonia_3	Europe_wide	23.9077	53.675	27.1368	0.396597	1.21037	3.13195	1.2826	1.24009	5.2768	8.04374	0.627696
341	Jonava_Ammonia_Plant_No_1_690	Jonava_Ammonia_Plant_No_1	Europe_wide	24.3423	55.0881	17.9327	0.380597	0.0152807	0.800424	9.25332	9.18392	11.8775	13.583	0.484458
344	Targu_705	Targu	Europe_wide	24.5088	46.5169	12.9424	0.247015	0.156761	0.912732	0.734172	0.404036	2.92509	5.85454	0.664763
373	sc_amonil_sa_slobozia_708	sc_amonil_sa_slobozia	Europe_wide	27.3848	44.5322	9.30572	0.229666	0.0810286	0.830666	0.662831	0.347728	4.19999	7.70132	0.453897
386	Basmakci_428	Basmakci	Europe_wide	30	37.88	6.77457	0.203028	0.0310772	0.836184	0.134935	0.082469	1.92813	3.49897	0.459494
387	Abu_Qir_Alexfert_Ammonia_plants_754	Abu_Qir_Alexfert_Ammonia_plants	Europe_wide	30.1005	31.2723	35.1991	1.1035	0.599927	3.77973	1.55641	1.1605	18.1494	46.6014	0.498618
389	Afyonkarahisar_427	Afyonkarahisar	Europe_wide	30.6	38.75	9.60955	0.18724	0.0195603	0.598602	0.152388	0.0700939	2.199	4.4926	0.633028
391	Acron_Novgorod_ammonia_I_689	Acron_Novgorod_ammonia_I	Europe_wide	31.2742	58.5256	10.2439	0.298942	0.0386052	0.249983	0.339367	0.338482	0.822674	1.08098	0.342598
393	Suez_ammonia_plant_860	Suez_ammonia_plant	Europe_wide	31.3802	31.0549	28.0488	0.995471	0.385993	10.3208	2.08174	1.0425	53.0653	92.0372	0.507547
395	Cherkassy_ammonia_I_661	Cherkassy_ammonia_I	Europe_wide	32.0678	49.3753	18.4511	0.289531	1.24839	1.93321	1.36199	1.29993	3.68761	5.66397	0.60069
398	Konya_430	Konya	Europe_wide	32.5	37.75	12.7234	0.203911	0.0206078	1.01507	0.124225	0.0586987	2.48107	4.34715	0.671813
401	ch_nikodimou_sia_ltd_382	ch_nikodimou_sia_ltd	Europe_wide	33.09	35.06	12.6549	0.258482	0.0620611	0.704101	0.345016	0.188111	2.89559	3.82463	0.63022
405	Dnieprodzerzhinksk_ammonia_II_658	Dnieprodzerzhinksk_ammonia_II	Europe_wide	34.6576	48.488	12.1754	0.258424	0.674033	1.41326	0.776058	0.733785	2.62193	4.08458	0.486494
406	Haql_465	Haql	Europe_wide	34.97	29.26	14.7205	0.407666	0.00132813	0.0767669	0.034157	0.0286777	1.61851	1.98578	0.607338
408	Al_Zarqa_Refinery_Hydrogen_Plant_529	Al_Zarqa_Refinery_Hydrogen_Plant	Europe_wide	36.1117	32.1232	8.06653	0.214845	0.117942	0.488929	0.519406	0.407603	1.54748	3.83896	0.526537
415	Cherepovets_ammonia_I_686	Cherepovets_ammonia_I	Europe_wide	37.9092	59.1323	12.4729	0.286986	0.132362	0.188951	0.287284	0.286412	0.572464	0.816455	0.419769
418	Novomoskovsk_682	Novomoskovsk	Europe_wide	38.1708	54.0839	35.1859	0.385587	0.410093	0.718842	0.539898	0.517671	1.71725	2.95062	0.702297
420	Severodonetsk_ammonia_I_654	Severodonetsk_ammonia_I	Europe_wide	38.4621	48.9454	5.46331	0.198465	1.34409	1.87328	1.50562	1.42164	3.40234	4.78306	0.306494
426	Rossosh_ammonia_I_666	Rossosh_ammonia_I	Europe_wide	39.6784	50.1413	15.4244	0.222879	0.0130865	0.430486	0.1985	0.189671	1.86372	3.40936	0.627911
429	Nevinnomyssk_I_684	Nevinnomyssk_I	Europe_wide	41.9515	44.661	22.4204	0.459937	0.0819097	0.520128	0.51827	0.110592	2.35019	4.66694	0.540158
436	Azot_Roustavi_694	Azot_Roustavi	Europe_wide	45.0585	41.5313	8.10026	0.32724	0.154077	1.02738	0.273321	0.232045	6.09631	10.1205	0.43322
441	Khor_Al_Zubair_417	Khor_Al_Zubair	Europe_wide	47.8362	30.1871	18.025	0.68553	0.0297028	0.201966	0.331958	0.192001	1.63363	4.93	0.467272
442	At_Tawdihiyah_421	At_Tawdihiyah	Europe_wide	47.95	24.22	17.1952	0.302173	0.0048613	0.332355	0.0257346	0.0242759	0.622683	0.91769	0.619553
448	Kuibyshev_ammonia_677	Kuibyshev_ammonia	Europe_wide	49.4533	53.5542	58.6225	0.566965	0.0892806	0.265055	0.39427	0.238064	0.96883	1.75311	0.763042
450	SAFCO_Ibn_Al-Baytar_ammonia_plants_762	SAFCO_Ibn_Al-Baytar_ammonia_plants	Europe_wide	49.5758	27.0728	28.0188	0.738639	0.523859	0.536951	0.946795	0.754347	0.830148	1.20897	0.559054
451	Togliatti_673	Togliatti	Europe_wide	49.6141	53.5437	69.342	0.574309	0.0585072	0.24657	0.520012	0.372677	0.97776	2.03182	0.809313
452	ZMU_ammonia_nitrate_and_fertilizer_plant_403	ZMU_ammonia_nitrate_and_fertilizer_plant	Europe_wide	49.96	58.53	19.3179	0.272132	0.0193569	0.0901272	0.467947	0.466188	0.915914	1.26681	0.61225
457	Aktau_Ammonia_I_692	Aktau_Ammonia_I	Europe_wide	51.2625	43.6209	10.6877	0.407042	0.031896	0.0587216	0.0334015	0.0329652	0.0945746	0.160813	0.338824
468	Shiraz_ammonia_I_773	Shiraz_ammonia_I	Europe_wide	52.7361	29.8905	17.756	0.420321	0.012957	0.950247	0.220843	0.06614	2.91716	5.3886	0.613939
475	Salavat_ammonia_plant_674	Salavat_ammonia_plant	Europe_wide	55.9052	53.4002	15.5801	0.288813	0.081903	0.332533	0.174187	0.170321	1.07933	2.02775	0.530226
478	Permneftorgsintez_Refinery_Hydrogen_Plant_506	Permneftorgsintez_Refinery_Hydrogen_Plant	Europe_wide	56.1348	57.9086	8.59097	0.317418	0.164139	0.310199	0.224531	0.220906	1.12378	1.48272	0.305232
481	Berezniki_ammonia_I_688	Berezniki_ammonia_I	Europe_wide	56.7849	59.4132	40.335	0.487354	0.0212178	0.138073	0.403897	0.403293	0.618972	0.743161	0.697989
482	Bojnurd_ammonia_plant_777	Bojnurd_ammonia_plant	Europe_wide	57.5108	37.5192	11.174	0.247904	0.0513898	0.722938	0.0900523	0.07698	2.24496	4.06367	0.589434
491	Mary_ammonia_I_663	Mary_ammonia_I	Europe_wide	61.844	37.4848	9.62847	0.378598	0.0284428	0.432877	0.0766686	0.0740038	1.76224	2.92527	0.314363
492	Navoiy_ammonia_I-II_647	Navoiy_ammonia_I-II	Europe_wide	65.3298	40.1114	28.3306	0.522095	0.0111968	1.55856	0.017975	0.0164685	4.47499	7.20856	0.54866
493	Antipinski_Refinery_Hydrogen_Plant_454	Antipinski_Refinery_Hydrogen_Plant	Europe_wide	65.7394	57.0986	7.46565	0.238589	0.129316	0.223962	0.141286	0.136484	0.504253	0.916939	0.318135
495	Vakhsh_ammonia_plant_664	Vakhsh_ammonia_plant	Europe_wide	68.8347	37.6797	8.91441	0.401357	0.235021	0.308035	1.85844	0.887325	1.20177	3.21043	0.377903
497	Engro_Daharki_Mirpur_Mathelo_Ammonia_Plant_781	Engro_Daharki_Mirpur_Mathelo_Ammonia_Plant	Europe_wide	69.6719	28.0383	70.3868	2.07603	0.514417	4.01908	5.33557	2.8399	15.4225	28.3755	0.435013
32	Yakima_Valley_Sunnyside_177	Yakima_Valley_Sunnyside	North_America	-120	46.33	27.7945	0.409582	0.0243985	1.84048	0.147986	0.0509368	4.50653	5.98196	0.669918
38	San_Joaquin_Bakersfield_Refinery_Plants_168	San_Joaquin_Bakersfield_Refinery_Plants	North_America	-119.049	35.3988	41.0975	1.10023	3.95706	6.59444	5.03572	4.61135	11.6197	17.0174	0.577391
46	THE_AMALGAMATED_SUGAR_COMPANY_LLC_NAMPA_15	THE_AMALGAMATED_SUGAR_COMPANY_LLC_NAMPA	North_America	-116.57	43.61	9.82303	0.326644	0.520265	5.79921	1.05176	0.96308	11.2749	15.5897	0.419607
48	Jerome_Wendell_164	Jerome_Wendell	North_America	-114.57	42.75	31.5762	0.495808	0.0707219	7.42339	0.443133	0.407149	17.2064	24.53	0.671165
53	Oakley_165	Oakley	North_America	-113.92	42.3	21.0952	0.360513	0.00188001	1.60833	0.954152	0.0206805	5.47907	13.8129	0.677796
58	Fort_Saskatchewan_ammonia_plant_and_Redwater_313	Fort_Saskatchewan_ammonia_plant_and_Redwater	North_America	-113.193	53.7257	8.92362	0.255324	0.332718	0.700059	4.18362	4.11347	5.59183	7.62255	0.365464
59	Milford_175	Milford	North_America	-113.14	38.23	10.8572	0.20531	0.00122036	0.838538	0.0268636	0.00864927	2.65807	5.04128	0.539372
61	Lethbridge_26	Lethbridge	North_America	-112.8	49.9	40.1875	0.349003	0.0323895	2.6413	0.0890552	0.0783491	6.48767	7.82667	0.799699
62	Delta_174	Delta	North_America	-112.51	39.37	6.90132	0.147895	0.00476118	0.839058	0.143475	0.111188	1.61355	2.36196	0.559158
63	Stanfield_149	Stanfield	North_America	-112	32.9	19.8241	0.330473	0.0207061	0.994603	0.176857	0.129058	2.46734	4.72112	0.727746
74	Culiacancito_140	Culiacancito	North_America	-107.57	24.83	10.1442	0.361122	0.0182808	0.55222	0.0670748	0.0552623	2.86742	5.06295	0.488915
75	Hatch_170	Hatch	North_America	-107.28	32.59	7.72725	0.187021	0.00501006	0.581433	0.13552	0.0302182	2.58836	3.6462	0.517637
76	Vado_171	Vado	North_America	-106.63	32.12	10.8251	0.186198	0.114456	3.48592	0.513088	0.24432	5.66164	7.64385	0.632343
78	Delicias_141	Delicias	North_America	-105.42	28.2	14.3187	0.231643	0.0527766	0.468673	0.0560764	0.0554508	0.786089	1.00736	0.695153
85	Dexter_Rosswell_169	Dexter_Rosswell	North_America	-104.43	33.29	17.6069	0.404467	0.0192741	3.49823	0.0366988	0.0277661	4.60725	6.08244	0.528554
86	Torreon_147	Torreon	North_America	-103.51	25.69	49.0623	0.939483	0.0352929	0.701744	0.0831394	0.0703125	2.10639	4.18098	0.751564
88	Acatic_138	Acatic	North_America	-102.9	20.78	26.4572	0.568167	0.00899109	1.79276	0.190034	0.0855829	4.10248	8.87606	0.613751
89	Eckley_Yuma_160	Eckley_Yuma	North_America	-102.57	40.14	22.7483	0.417004	0.00227608	1.26488	0.0116985	0.00608011	4.47819	9.65485	0.568251
90	Vista_Hermosa_de_Negrete_Los_Charcos_148	Vista_Hermosa_de_Negrete_Los_Charcos	North_America	-102.45	20.26	14.1768	0.495904	0.0157936	0.66288	0.141099	0.0687474	4.78932	8.7507	0.442743
91	Amarillo_34	Amarillo	North_America	-102.4	34.8	36.0439	0.640219	0.00811728	5.72213	0.0212212	0.0149985	15.5255	27.7435	0.593757
92	Jalostotitlan_San_Juan_de_Los_Lagos_143	Jalostotitlan_San_Juan_de_Los_Lagos	North_America	-102.38	21.26	36.7786	0.662787	0.00531945	2.17867	0.0822411	0.023823	7.9974	13.3791	0.701224
98	Monclova_185	Monclova	North_America	-101.43	26.88	6.6531	0.205419	0.0113806	0.244127	0.0553525	0.012773	1.00597	2.11673	0.517102
102	Garden_City_166	Garden_City	North_America	-100.84	37.81	34.8432	0.637336	0.0126965	4.40915	0.13899	0.0996565	12.2063	21.2457	0.53759
107	Ezequiel_Montes_142	Ezequiel_Montes	North_America	-99.91	20.68	16.0705	0.575173	0.00896986	1.11091	0.162126	0.0596863	3.3255	6.97602	0.459793
128	Wisner_168	Wisner	North_America	-96.93	41.97	34.0311	1.30828	0.00448486	3.1402	0.0768717	0.0339555	11.7704	21.6118	0.335071
134	Sioux_163	Sioux	North_America	-96.3	43.15	34.2943	0.879652	0.0300998	5.32301	0.198683	0.0500697	17.4328	32.4307	0.437552
175	PCS_Geismar_ammonia_plant_281	PCS_Geismar_ammonia_plant	North_America	-91.0562	30.2198	12.2932	0.489284	14.6985	15.0198	24.7869	24.0027	24.6095	26.1556	0.350302
177	Donaldsonville_Faustina_ammonia_plants_301	Donaldsonville_Faustina_ammonia_plants	North_America	-90.9577	30.0987	17.0388	0.47834	10.9953	11.3007	24.6727	20.1615	20.7566	25.7431	0.469799
227	Royston_162	Royston	North_America	-83.11	34.29	14.4867	0.403595	0.0287029	6.96959	0.374364	0.112662	15.6336	23.0897	0.489574
237	Augusta_ammonia_plant_280	Augusta_ammonia_plant	North_America	-81.9302	33.4435	9.95372	0.38279	2.04828	2.35191	2.22608	2.1792	3.25088	4.71568	0.358769
259	Bridgewater_176	Bridgewater	North_America	-79.01	38.42	14.5733	0.420286	0.0554648	4.19556	0.211148	0.114308	9.00971	13.6606	0.44534
262	North_Carolina_123	North_Carolina	North_America	-78.02	35.1	23.4913	0.570571	0.0225895	18.402	0.217408	0.0862859	46.5646	61.2922	0.516256
272	Moa_172	Moa	North_America	-74.8881	20.6372	16.175	0.618966	0.0137199	0.0925223	0.0675859	0.033746	0.591092	1.24	0.365356
2	Bamako_36	Bamako	Africa	-8.02	12.61	14.8385	0.659521	0.174589	0.473619	0.214726	0.192162	1.2044	2.26884	0.314518
7	Abidjan_Refinery_Hydrogen_Plant_94	Abidjan_Refinery_Hydrogen_Plant	Africa	-3.99352	5.26096	22.8962	1.25188	2.96073	2.99215	4.83427	4.67793	5.04308	5.34932	0.353521
19	Port_Harcourt_23	Port_Harcourt	Africa	7.2	4.7	24.1452	1.38118	0.336898	1.05175	1.24723	0.764571	2.7756	4.00237	0.343265
38	Sasol_Synfuels_220	Sasol_Synfuels	Africa	29.1879	-26.5595	18.9936	0.479008	0.173356	0.68955	0.440131	0.27425	2.23806	5.26642	0.512748
43	Abu_Qir_Ammonia_I_187	Abu_Qir_Ammonia_I	Africa	30.1005	31.2723	20.6233	0.558817	0.599927	3.77973	1.55641	1.1605	18.1494	46.6014	0.489509
45	Delta_Suez_Ammonia_plants_180	Delta_Suez_Ammonia_plants	Africa	31.3995	31.0723	19.011	0.680862	0.385993	10.3208	2.08174	1.0425	53.0653	92.0372	0.429131
48	Omdurman_8	Omdurman	Africa	32.45	15.6	13.4915	0.399013	1.84827	2.32282	4.88786	3.00173	4.2912	7.7863	0.442822
70	SAFCO_Samad_Ibn_Al-Baytar_ammonia_plants_194	SAFCO_Samad_Ibn_Al-Baytar_ammonia_plants	Africa	49.5758	27.0728	15.4752	0.513417	0.523859	0.536951	0.946795	0.754347	0.830148	1.20897	0.380671
82	Shiraz_Ammonia_I_205	Shiraz_Ammonia_I	Africa	52.7361	29.8905	16.8052	0.353047	0.012957	0.950247	0.220843	0.06614	2.91716	5.3886	0.606889
1	Omsk_Refinery_Hydrogen_Plant_115	Omsk_Refinery_Hydrogen_Plant	China	73.2274	55.075	5.74167	0.179092	0.242152	0.330376	0.477403	0.461755	1.06429	1.86245	0.322022
17	Yankuang_Xinjiang_Coal_Chemicals_Co_Ltd_556	Yankuang_Xinjiang_Coal_Chemicals_Co_Ltd	China	81.05	44	10.7448	0.353734	0.0463464	2.37506	0.279781	0.203171	9.6522	12.4104	0.463454
19	CPI_Yili_SNG_Plant_498	CPI_Yili_SNG_Plant	China	81.2241	43.9569	12.4775	0.362364	0.0340713	1.90441	0.268677	0.164925	8.41968	12.7521	0.540694
20	Yili_SNG_plants_424	Yili_SNG_plants	China	81.4241	43.9169	11.4416	0.363053	0.0694598	3.99733	0.211121	0.145125	8.14887	11.672	0.515173
28	Kuitun_Ammonia_Plant_505	Kuitun_Ammonia_Plant	China	84.9033	44.4265	14.1054	0.502452	0.0247645	1.51368	0.150137	0.0890807	6.49581	11.1881	0.488165
32	Kemerovo_Ammonia_I_203	Kemerovo_Ammonia_I	China	86.0623	55.345	16.5398	0.263835	0.0839311	0.152924	0.412551	0.390599	0.816197	1.26566	0.60343
37	Yankuang_Changji_SNG_Plants_415	Yankuang_Changji_SNG_Plants	China	87.2082	44.1612	9.63488	0.525085	0.0670181	3.75359	0.285703	0.198609	11.3449	16.179	0.308588
38	Henan_Coal_Changji_SNG_Plant_421	Henan_Coal_Changji_SNG_Plant	China	87.2582	44.0112	14.8054	0.551612	0.0813038	4.76345	0.299628	0.209466	12.4123	16.8224	0.431206
39	Huadian_Changji_Ammonia_Plant_406	Huadian_Changji_Ammonia_Plant	China	87.3582	44.0612	17.8431	0.550154	0.0570158	3.30151	0.290186	0.196061	11.3259	16.1799	0.495874
42	Urumqi_Ammonia_Plants_638	Urumqi_Ammonia_Plants	China	87.6668	43.8256	15.2644	0.609066	0.014052	1.02517	0.232188	0.114351	6.42185	12.78	0.401823
43	Midong-Fukang_48	Midong-Fukang	China	87.7	43.95	29.9786	0.642716	0.0191353	1.21258	0.198732	0.0926486	5.66827	11.1135	0.640481
47	Wucaiwan_49	Wucaiwan	China	89.19	44.92	21.2231	0.415448	0.00285495	0.00285495	0.0190558	0.00953316	0.00953316	0.0190558	0.58619
52	Abakan_83	Abakan	China	91.03	53.73	10.6227	0.186742	0.00139967	0.083412	0.0590275	0.0572865	0.540288	1.03809	0.581306
58	ChaerhanSaltLake_29	ChaerhanSaltLake	China	95.32	36.73	8.23398	0.305299	0.00612342	0.215243	0.0280435	0.0162742	0.478809	0.809398	0.366835
63	Huangzhong-Qiangoucun-Xining_30	Huangzhong-Qiangoucun-Xining	China	101.53	36.49	12.9426	0.452999	0.0787479	3.64049	0.391847	0.22223	10.2608	18.4153	0.446458
64	Gansu_Jinchang_Syngas_Plant_110	Gansu_Jinchang_Syngas_Plant	China	102.08	38.3708	9.70519	0.401452	0.0145742	0.367017	0.195885	0.0911798	2.70705	5.96197	0.343388
66	Anning_Yuntianhua_602	Anning_Yuntianhua	China	102.478	24.9195	12.4838	1.40111	0.0783819	2.171	0.533021	0.264834	6.98549	13.7671	0.348037
70	Yiliang_52	Yiliang	China	103.18	24.99	21.0972	1.55275	0.0810435	2.10746	0.57151	0.301057	8.03348	15.0647	0.491043
71	Kaiyuan_50	Kaiyuan	China	103.26	23.75	22.0494	0.768056	0.0466681	1.10526	0.524079	0.209326	5.1107	12.5368	0.550336
72	Yongjing_68	Yongjing	China	103.27	36.01	16.2066	0.469754	0.0462548	1.51224	0.373687	0.174695	6.27304	12.8692	0.546505
81	Deyang-Guanghan-Xindu_31	Deyang-Guanghan-Xindu	China	104.24	30.87	23.4771	0.960174	0.155681	4.26477	1.41331	0.729903	20.438	39.8713	0.540974
90	Ningxia_Baofeng_Methanol_Plant_241	Ningxia_Baofeng_Methanol_Plant	China	106.063	38.4797	29.9394	0.713012	0.111891	3.79975	0.497987	0.268615	8.79957	16.2674	0.574604
91	PetroChina_Ningxia_Ammonia_Plant_612	PetroChina_Ningxia_Ammonia_Plant	China	106.181	38.4719	28.7068	0.786248	0.0885453	3.25683	0.533551	0.278262	9.08638	17.308	0.522598
92	Qinghua_Group_Methanol_Plant_270	Qinghua_Group_Methanol_Plant	China	106.198	37.9975	17.5973	0.684445	0.117463	4.23321	0.501391	0.280495	8.30389	13.8165	0.386195
99	Juitai_Energy_Ordos_MEG_Plant_247	Juitai_Energy_Ordos_MEG_Plant	China	106.704	39.4724	22.0645	0.543837	0.0143588	0.36126	0.147328	0.0466394	1.05009	4.11201	0.51672
100	Xiaozhaibazhen_10	Xiaozhaibazhen	China	106.72	27.18	20.1323	1.30423	0.126937	2.1825	0.918722	0.484263	8.46177	16.6547	0.381368
107	Fujing_Ammonia_Plant_193	Fujing_Ammonia_Plant	China	107.5	29.5647	11.5868	0.790314	0.108391	1.25937	1.09138	0.564778	7.29985	14.7337	0.303863
112	Jinnui_Neimeng_Wuyuan_517	Jinnui_Neimeng_Wuyuan	China	108.268	41.0884	11.7855	0.421688	0.0523972	2.57293	0.182759	0.125018	6.05639	8.18418	0.364907
117	Wulashan_26	Wulashan	China	108.73	40.68	15.7316	0.452389	0.0277403	1.06065	0.143871	0.0863146	3.53658	5.80975	0.451227
124	Pucheng_Weinan_MTO_Plant_328	Pucheng_Weinan_MTO_Plant	China	109.407	34.4955	33.1424	1.16768	0.207987	4.13279	1.23088	0.61445	11.8587	22.4405	0.556894
125	Weihe_Ammonia_Plant_III_588	Weihe_Ammonia_Plant_III	China	109.51	34.5	36.7626	1.12974	0.192527	3.75045	1.09553	0.595245	11.2921	19.9947	0.6021
129	Baotou_72	Baotou	China	109.68	40.66	21.1722	0.470009	0.0449945	1.79612	0.223	0.13017	5.66419	9.36268	0.546261
134	Shenhua_Baotou_MEG_Plant_88	Shenhua_Baotou_MEG_Plant	China	109.84	40.658	15.4413	0.457888	0.045361	1.82778	0.240113	0.134765	5.78394	10.0812	0.438097
140	Shenhua_Erdos_600	Shenhua_Erdos	China	110.157	39.3282	11.4545	0.463687	0.0262896	0.598174	0.248877	0.1334	3.26713	6.26934	0.342992
142	Jinjiezhen_76	Jinjiezhen	China	110.19	38.71	11.4454	0.406138	0.0633755	1.03654	0.447576	0.198363	3.37782	8.51745	0.375308
143	Sanwei_Neimenggu_Methanol_Plant_508	Sanwei_Neimenggu_Methanol_Plant	China	110.2	39	17.59	0.466124	0.0657336	1.15527	0.318504	0.196085	3.82184	6.27687	0.486691
144	Sunjiachazhen_77	Sunjiachazhen	China	110.36	39.15	25.2501	0.422788	0.0481922	1.23072	0.33813	0.164612	3.85802	8.21853	0.661516
148	Linyi_Ammonia_Plant_302	Linyi_Ammonia_Plant	China	110.748	35.1218	19.0328	0.997831	0.202896	4.2156	1.15915	0.591278	12.0025	26.4749	0.392567
153	Xiangfen_80	Xiangfen	China	111.4	35.91	16.4954	0.87365	0.176196	3.47219	0.918745	0.472052	8.99288	17.2095	0.39374
155	Chuxing_Yichang_Ammonia_Plant_113	Chuxing_Yichang_Ammonia_Plant	China	111.451	30.4758	24.524	1.12447	0.14928	3.06472	0.958901	0.494034	9.52129	16.5234	0.382347
156	Hubei_Yihua_Ammonia_Plant_118	Hubei_Yihua_Ammonia_Plant	China	111.65	30.3904	50.8452	1.26163	0.157361	3.30074	1.00122	0.503935	10.6316	20.3937	0.599632
161	Sinopec_Zhijiang_611	Sinopec_Zhijiang	China	111.75	30.4167	38.6573	1.1974	0.129864	2.89521	0.977333	0.500472	11.1627	20.8066	0.51269
162	Xiaoyi_81	Xiaoyi	China	111.8	37.09	17.6596	0.83514	0.188996	3.81114	0.811929	0.454484	8.4346	14.0852	0.431802
169	Jiaocheng_42	Jiaocheng	China	112.2	37.58	25.7313	0.763208	0.148331	2.5419	0.836812	0.439514	7.74659	14.6733	0.575443
170	Hujizhen-Shuanghe-Linkuang_14	Hujizhen-Shuanghe-Linkuang	China	112.27	31.33	28.3292	1.22274	0.0937246	2.34053	0.886774	0.422166	8.66084	18.989	0.379264
171	Yangquan_Qingxu_Ammonia_Plant_367	Yangquan_Qingxu_Ammonia_Plant	China	112.359	37.6074	20.1502	0.913963	0.181259	3.46946	0.867758	0.487563	8.80715	15.255	0.434381
178	Luoyang_MEG_Plant_321	Luoyang_MEG_Plant	China	112.523	34.6935	22.1859	1.35891	0.2395	12.9943	1.51995	0.783321	42.1326	79.1905	0.315338
179	Beiliuzhen_40	Beiliuzhen	China	112.6	35.46	30.3991	1.9539	0.0872934	1.50023	0.932104	0.40952	7.23105	28.0162	0.318307
181	Shanxi_Qiyi_MTO_Plant_266	Shanxi_Qiyi_MTO_Plant	China	112.851	36.364	24.085	1.55602	0.107784	2.16746	0.854107	0.422152	7.98236	15.9539	0.304405
182	Zezhou-Gaoping_46	Zezhou-Gaoping	China	112.87	35.64	34.2807	2.12967	0.100518	1.9625	0.981019	0.45125	8.67916	24.269	0.329046
184	Shanxi_Lu_CTL_Plant_471	Shanxi_Lu_CTL_Plant	China	112.931	36.4366	33.8925	1.49016	0.0911793	1.85188	0.853	0.437994	8.34197	15.9861	0.411813
187	Xiangyuan_Qiyi_Changzhi_Methanol_Plant_298	Xiangyuan_Qiyi_Changzhi_Methanol_Plant	China	113.105	36.3239	32.1891	1.68068	0.160853	3.07645	0.946798	0.493675	9.57156	18.4557	0.349976
190	Nanhai_Gasification_Plant_393	Nanhai_Gasification_Plant	China	113.143	23.0961	17.3372	0.743109	0.330917	6.63371	2.06559	1.09423	20.9136	38.8095	0.372952
191	Shanxi_Ammonia_Plant_626	Shanxi_Ammonia_Plant	China	113.229	36.3341	31.0724	1.50375	0.10238	1.92702	0.994495	0.511918	10.7903	21.0736	0.373544
196	Hubei_Shuanghuan_Chemical_613	Hubei_Shuanghuan_Chemical	China	113.567	30.9333	46.7445	1.39996	0.118578	3.00219	1.11449	0.571023	13.9434	25.681	0.508902
197	Henan_Jindadi_Ammonia_Plant_117	Henan_Jindadi_Ammonia_Plant	China	113.609	33.4379	33.5467	1.4273	0.172735	8.71104	1.69448	0.850905	41.9605	83.8947	0.365754
199	Henan_Zhongxin_Chemical_Works_534	Henan_Zhongxin_Chemical_Works	China	113.667	35.2667	41.3978	1.63147	0.170358	9.3184	1.44287	0.759088	38.975	70.8649	0.445933
201	Haohua_Zhumadian_Ammonia_Phase_1_272	Haohua_Zhumadian_Ammonia_Phase_1	China	114.04	32.9833	33.8043	1.22803	0.250672	11.7667	1.62971	0.827896	38.6855	74.4303	0.405042
209	Hebei_Yangmei_Zhengyuan_Ammonia_Plant_402	Hebei_Yangmei_Zhengyuan_Ammonia_Plant	China	114.378	38.3064	43.2074	1.27213	0.291281	8.37104	1.6455	0.876981	24.0919	43.9531	0.514698
211	Jinshi_Shijiazhuang_Ammonia_Plants_475	Jinshi_Shijiazhuang_Ammonia_Plants	China	114.498	38.0436	28.1823	1.37476	0.182779	5.35889	1.86343	0.938593	26.6027	52.6872	0.331018
212	Shijiazhuang-Gaocheng_16	Shijiazhuang-Gaocheng	China	114.77	38.09	32.9349	1.4431	0.299371	8.62471	2.01185	0.995087	29.1472	59.5441	0.361855
219	Linquan_7	Linquan	China	115.28	33.07	32.2205	1.23787	0.163349	4.74863	1.66625	0.828017	28.2584	59.526	0.386751
220	Shenzhou_Ethylene_Glycol_Plant_363	Shenzhou_Ethylene_Glycol_Plant	China	115.34	38	33.657	1.58565	0.312933	9.85002	1.87568	1.0427	32.6791	59.1682	0.32107
224	Anhui_Haoyuan_Chemical_528	Anhui_Haoyuan_Chemical	China	115.817	32.9	23.6297	1.18773	0.242116	5.4659	1.61237	0.806813	17.8649	35.9108	0.315006
240	Huaihua_Anhui_Ammonia_Plant_485	Huaihua_Anhui_Ammonia_Plant	China	116.96	32.61	27.7163	1.00495	0.219005	4.15191	1.53324	0.740502	14.395	30.5446	0.43868
258	Jiutai_Linyi_MEG_Plant_252	Jiutai_Linyi_MEG_Plant	China	118.258	35.0218	24.3935	1.19645	0.297985	9.11348	2.05683	0.995213	27.8542	53.8594	0.306645
260	Sinopec_Qilu_Syngas_Plant_608	Sinopec_Qilu_Syngas_Plant	China	118.309	36.827	25.1127	1.17031	0.192934	5.82568	1.8281	0.937208	27.022	51.9794	0.302544
261	Linyi_Methanol_Plant_365	Linyi_Methanol_Plant	China	118.356	35.1047	25.5147	1.22006	0.298608	9.38095	2.02474	0.993254	27.4157	52.9214	0.311805
262	Linyi_35	Linyi	China	118.47	34.94	41.6574	1.19564	0.205003	5.60565	2.17497	1.08623	26.7616	53.0464	0.487256
270	Shouguang_36	Shouguang	China	118.81	36.93	36.1415	1.09769	0.181427	4.94992	1.54281	0.873446	24.6187	42.8242	0.440371
280	Hulunbeier_Ammonia_Plant_539	Hulunbeier_Ammonia_Plant	China	119.716	49.2116	10.6558	0.284574	0.0288369	1.16026	0.10321	0.0733513	2.69724	3.29635	0.400048
291	Zhongyan_Kunshan_520	Zhongyan_Kunshan	China	120.985	31.3219	19.6771	1.02585	1.50673	7.29193	7.76937	4.45348	22.5887	43.1403	0.324411
301	Mulituzhen_24	Mulituzhen	China	122.24	43.46	16.4665	0.470127	0.0130081	0.759914	0.1233	0.0586411	3.20784	5.53452	0.398772
302	Tongliao_GEM_I_256	Tongliao_GEM_I	China	122.243	43.6529	17.1	0.477228	0.0171647	1.12714	0.135732	0.0721233	3.74168	6.40826	0.405303
304	Hongyu_Zalantun_Ammonia_Plant_313	Hongyu_Zalantun_Ammonia_Plant	China	122.763	47.9959	15.8359	0.308997	0.0238754	0.814785	0.172233	0.0793673	2.82817	6.13167	0.528892
305	HulanErgi_17	HulanErgi	China	123.67	47.19	18.6555	0.411257	0.0604759	2.15539	0.27894	0.160612	5.74714	9.89003	0.463829
306	Changshan_20	Changshan	China	124.52	45.32	14.2216	0.504472	0.0476157	2.19195	0.316301	0.164657	7.66512	14.0189	0.334927
307	Daqing_Oxochemicals_Plant_640	Daqing_Oxochemicals_Plant	China	125.05	46.5833	13.9897	0.466498	0.047418	1.17651	0.303076	0.152008	4.16782	9.30108	0.332463
308	Anju_66	Anju	China	125.65	39.62	12.9078	0.47435	0.804055	2.57283	6.01252	2.9397	8.89503	16.4408	0.393649
0	Karachi_Power_Plant_118	Karachi_Power_Plant	India	67.1385	24.7842	46.3682	1.41662	2.38296	2.90154	6.12496	4.42539	7.5158	11.8439	0.492811
2	Vakhsh_Ammonia_Plant_68	Vakhsh_Ammonia_Plant	India	68.8347	37.6797	8.45603	0.40794	0.235021	0.308035	1.85844	0.887325	1.20177	3.21043	0.355981
3	Engro_Daharki_Mirpur_Mathelo_Ammonia_Plants_76	Engro_Daharki_Mirpur_Mathelo_Ammonia_Plants	India	69.6719	28.0383	70.3868	2.07603	0.514417	4.01908	5.33557	2.8399	15.4225	28.3755	0.435013
5	Fatima_Sadiqabad_Machhi_Ammonia_Plants_50	Fatima_Sadiqabad_Machhi_Ammonia_Plants	India	70.0305	28.2616	72.3913	1.92363	0.617978	3.43402	5.87325	3.0623	15.7917	26.5393	0.469448
9	Essar_Hazira_63	Essar_Hazira	India	72.6547	21.1048	30.5275	1.01244	2.57377	5.09988	6.69151	4.23647	11.3982	20.8078	0.45409
10	Thal_I_83	Thal_I	India	72.8717	18.7025	20.1309	0.801535	1.85208	3.00566	17.2435	4.1228	7.83949	25.0196	0.431438
11	Trombay_V_84	Trombay_V	India	72.8871	19.0413	26.8756	0.767655	7.16782	8.00255	20.7735	15.5095	19.7172	29.2401	0.549607
14	Ankleshwar_5	Ankleshwar	India	72.99	21.58	25.2156	0.906819	1.16676	5.92565	8.39036	3.12436	17.1317	35.5623	0.434044
15	Narmada_Ammonia_Methanol_Plant_130	Narmada_Ammonia_Methanol_Plant	India	73.0076	21.7356	22.7143	0.941814	0.835983	4.00858	8.85182	3.41438	18.0218	37.8342	0.385073
26	Gadepan_Ammonia_I_108	Gadepan_Ammonia_I	India	76.1838	25.1524	25.7396	1.15476	0.717838	3.31091	6.83521	3.74372	16.0517	30.0979	0.300453
31	Vijaipur_I_87	Vijaipur_I	India	77.1499	24.4967	30.3284	1.24571	0.583829	3.62171	4.12681	2.11432	12.4512	24.6539	0.327787
36	Namakkal_1	Namakkal	India	78.16	11.24	19.9703	0.820256	0.979117	3.77465	11.4413	5.46304	20.6402	43.1651	0.359605
38	Hyderabad_0	Hyderabad	India	78.49	17.41	26.8778	1.15882	2.48294	7.32497	9.0286	5.51468	21.0312	38.9167	0.335654
63	Chaerhan_Salt_Lake_4	Chaerhan_Salt_Lake	India	95.32	36.73	8.23873	0.305266	0.00612342	0.215243	0.0280435	0.0162742	0.478809	0.809398	0.367052
3	Cartavio_Chicama_Trujillo_6	Cartavio_Chicama_Trujillo	South_America	-79.06	-7.98	15.8446	0.631561	0.0753102	0.471254	0.152407	0.147111	1.29447	2.1207	0.540383
4	Tiroles_El_Condor_13	Tiroles_El_Condor	South_America	-77.54	-10.98	17.634	0.583954	0.00756547	0.477134	0.0280056	0.0188904	1.3255	2.6307	0.617837
8	Punta_Hermosa_11	Punta_Hermosa	South_America	-76.79	-12.28	18.1433	0.832291	0.234776	0.413873	1.41738	0.958057	2.05542	3.49713	0.525136
10	Alto_Laran_District_4	Alto_Laran_District	South_America	-76.04	-13.44	18.225	0.649218	0.0121247	0.142744	0.0366247	0.0170401	1.14468	2.3399	0.596465
14	Santander_Dept_Bucaramanga_3	Santander_Dept_Bucaramanga	South_America	-73.12	7.05	8.20178	0.37732	0.276268	0.816288	0.399245	0.327694	3.07456	6.93496	0.447875
15	Majes_9	Majes	South_America	-72.2	-16.36	7.30716	0.26147	0.000255744	0.0432531	0.00486777	0.00196279	0.25419	0.757339	0.576736
16	Vitor_District_Arequipa_14	Vitor_District_Arequipa	South_America	-71.7	-16.44	7.12435	0.218434	0.140172	0.274102	0.155515	0.152807	0.686415	1.13042	0.643771
51	Sergipe_Ammonia_Plant_89	Sergipe_Ammonia_Plant	South_America	-37.1432	-10.771	10.3487	0.630156	0.0381094	0.463549	0.675667	0.47243	2.68703	5.71505	0.326581
52	Niquelandia_999	Niquelandia	South_America	-48.4015	-14.357	13.3379	0.569126	0.00116504	0.549043	0.0183848	0.0138376	2.50076	5.02503	0.376324
6	Asean_Aceh_Fertilizer_Plant_92	Asean_Aceh_Fertilizer_Plant	South_East_Asia	97.027	5.24652	8.58246	0.377942	0.56769	1.66889	3.50665	2.92476	8.01627	11.482	0.374201
7	Thung_Luang_Chom_Bueng_4	Thung_Luang_Chom_Bueng	South_East_Asia	99.69	13.39	16.5073	0.671618	1.26675	3.54648	5.7572	3.21707	9.19482	17.6497	0.365173
9	Gurun_Ammonia_Plant_71	Gurun_Ammonia_Plant	South_East_Asia	100.499	5.83559	7.06397	0.350739	0.382246	1.17581	4.20258	1.86694	5.52717	12.3436	0.300046
11	Bangchak_Refinery_Hydrogen_Plant_39	Bangchak_Refinery_Hydrogen_Plant	South_East_Asia	100.593	13.6868	13.1755	0.538239	6.63307	8.93195	21.0777	17.6085	25.339	32.9428	0.3284
28	Palembang_18	Palembang	South_East_Asia	104.71	-2.83	38.5412	1.05931	0.84676	3.64187	4.61452	2.44465	16.7172	30.0828	0.515067
30	Pusri_IB_95	Pusri_IB	South_East_Asia	104.806	-2.97587	57.2648	0.965712	1.01653	5.46138	4.72831	2.5557	17.3903	32.1831	0.698579
45	Kujang_Ammonia_Plants_83	Kujang_Ammonia_Plants	South_East_Asia	107.429	-6.40623	15.6692	0.516296	4.54935	8.75298	24.6454	13.188	26.8615	50.1917	0.450121
47	Liuzhou_Chemical_132	Liuzhou_Chemical	South_East_Asia	109.383	24.3167	13.6951	0.595334	0.105599	2.58654	0.714455	0.335219	7.64289	16.1437	0.326006
52	Gresik_Ammonia_Plant_91	Gresik_Ammonia_Plant	South_East_Asia	112.638	-7.1525	27.2903	0.519686	2.31516	4.11123	12.877	8.27221	16.0259	25.4818	0.628476
61	Kaltim_Parna_Ammonia_Plant_84	Kaltim_Parna_Ammonia_Plant	South_East_Asia	117.496	0.176768	29.3921	0.776358	0.198037	0.343008	1.59656	0.519302	1.12013	2.97732	0.579009
13	riverina_feedlot_7	riverina_feedlot	Australia	146.48	-34.64	6.48255	0.190531	0.00181927	0.255196	0.0133622	0.0077204	1.25991	2.404	0.39228
23	wallumba_feedlot_16	wallumba_feedlot	Australia	150.24	-26.84	5.28707	0.246416	0.000207785	0.135967	0.0193232	0.0184242	0.768427	1.39866	0.315652
25	caroona_feedlot_18	caroona_feedlot	Australia	150.38	-31.39	5.38928	0.187569	0.000996836	0.268473	0.011682	0.00497881	1.08913	2.14541	0.370482
27	killara_feedlot_20	killara_feedlot	Australia	150.59	-31.47	4.33213	0.194867	0.000552208	0.191556	0.0182781	0.00260394	0.947671	2.36443	0.304217
32	whyalla_feedlot_25	whyalla_feedlot	Australia	151.05	-28.75	6.52869	0.230195	0.000130313	0.0965713	0.00211541	0.000961072	0.588059	1.93902	0.397243
35	sandalwood_feedlot_28	sandalwood_feedlot	Australia	151.43	-27.14	6.16673	0.250208	0.00564365	0.135763	0.0645459	0.0100403	0.807206	2.46949	0.342694
38	kerwee_feedlot_30	kerwee_feedlot	Australia	151.55	-27.39	5.8381	0.257729	0.00286989	0.209371	0.0955121	0.0613057	1.57755	2.62756	0.317375
46	Kapuni_Ammonia_Plant_41	Kapuni_Ammonia_Plant	Australia	174.165	-39.4766	9.47661	0.413271	0.00463106	1.15161	0.0310678	0.00698627	2.54476	4.00709	0.319228
23	Kaiyuan	103.26												23.75
29	Panjiangzhen_Yanfangxiang	103.92												25.78
33	Palembang	104.71												-2.83
35	Pusri_IB	104.806												-2.97587
47	Xiaozhaibazhen	106.72												27.18
51	Kujang_Ammonia_Plants	107.429												-6.40623
52	Fujing_Ammonia_Plant	107.5												29.5647
54	Liuzhou_Chemical	109.383												24.3167
60	Gresik_Ammonia_Plant	112.638												-7.1525
63	Nanhai_Gasification_Plant	113.143												23.0961
70	Kaltim_Parna_Ammonia_Plant	117.496												0.176768
1	Gresik_Ammonia_Plant	112.638												-7.1525
25	riverina_feedlot	146.48												-34.64
26	riverina_feedlot	146.48												-34.64
45	wallumba_feedlot	150.24												-26.84
46	wallumba_feedlot	150.24												-26.84
49	caroona_feedlot	150.38												-31.39
50	caroona_feedlot	150.38												-31.39
53	killara_feedlot	150.59												-31.47
63	whyalla_feedlot	151.05												-28.75
64	whyalla_feedlot	151.05												-28.75
69	sandalwood_feedlot	151.43												-27.14
70	sandalwood_feedlot	151.43												-27.14
75	kerwee_feedlot	151.55												-27.39
76	kerwee_feedlot	151.55												-27.39
91	Kapuni_Ammonia_Plant	174.165												-39.4766
92	Kapuni_Ammonia_Plant	174.165												-39.4766

## Sheet: IASI_B
index	code_name	Name	region_IASI_B	lon	lat	Emission_IASI_B	Emission_uncertainty_IASI_B	HTAPv2_no_agri_0.500.25	HTAPv2_0.500.25	HTAPv2_no_agri_1.001.00	HTAPv2_no_agri_1.000.50	HTAPv2_1.000.50	HTAPv2_1.001.00	corr_x_IASI_B
3	intergados_vicente_nobre_13	intergados_vicente_nobre	Europe_wide	-8.87	39.28	10.5876	0.351123	0.118659	1.01767	0.64264	0.307983	2.89266	5.20391	0.358889
26	finca_ca_ada_de_ronquera_33	finca_ca_ada_de_ronquera	Europe_wide	-5.7	37.42	5.4341	0.233169	0.110315	1.8746	0.483581	0.303339	5.04913	8.08667	0.328143
32	El_Viso_Pozoblanco_423	El_Viso_Pozoblanco	Europe_wide	-4.89	38.43	10.0755	0.299311	0.0484954	0.357587	0.213529	0.12115	1.45454	2.97268	0.435262
33	granja_las_olmeras_cb_39	granja_las_olmeras_cb	Europe_wide	-4.86	37.23	5.27917	0.210477	0.0761822	1.0438	0.626598	0.352325	4.96628	9.77353	0.330999
36	Menasalbas_425	Menasalbas	Europe_wide	-4.26	39.64	12.7279	0.323256	0.0335854	1.05619	0.334961	0.124112	4.0365	8.50982	0.497121
37	Puertollano_ammonia_plant_723	Puertollano_ammonia_plant	Europe_wide	-4.06063	38.6696	6.85327	0.289166	1.58128	2.01028	2.1306	2.00466	4.28734	6.07463	0.326079
63	holcim_f_brica_de_lorca_69	holcim_f_brica_de_lorca	Europe_wide	-1.71	37.7	17.841	0.369836	0.0478939	1.10013	0.288364	0.157993	3.62916	7.68846	0.579691
71	Canovas_422	Canovas	Europe_wide	-1.26	37.74	23.6432	0.417637	0.0471831	1.003	0.815166	0.656492	3.71685	6.75794	0.637624
73	carnicas_75	carnicas	Europe_wide	-1.13	37.99	12.5371	0.348087	0.0922772	1.43155	0.880262	0.240131	4.13439	7.15646	0.472309
85	Arzew_Sofert_Ammonia_Plants_580	Arzew_Sofert_Ammonia_Plants	Europe_wide	-0.340962	35.8059	20.7909	0.482	0.0345133	0.190793	0.12509	0.0767855	0.612447	1.12034	0.51334
92	sat_la_vall_de_soses_91	sat_la_vall_de_soses	Europe_wide	0	42	13.324	0.542322	0.168699	2.28079	0.277152	0.227753	5.85447	8.40541	0.329057
96	lleidacamp_98	lleidacamp	Europe_wide	0.42	41.8	24.6347	0.580192	0.0408727	2.49197	0.382251	0.281769	7.34505	11.2377	0.542139
98	cal_muntany_s_sat_1058_99	cal_muntany_s_sat_1058	Europe_wide	1	42	14.849	0.421369	0.0233335	2.90452	0.201206	0.0757277	7.48367	11.5582	0.455749
175	Brunsbuttel_Ammonia_Plant_849	Brunsbuttel_Ammonia_Plant	Europe_wide	9.21377	53.9113	14.1453	0.493295	0.0318194	2.46529	0.358667	0.125241	8.83583	19.8378	0.312755
180	saintgobain_isover_italia_spa_182	saintgobain_isover_italia_spa	Europe_wide	9.63	45.52	21.3668	0.834641	0.218154	8.70953	1.17027	0.761136	29.1893	44.0864	0.424354
198	Sapio_Mantua_Hydrogen_Plant_488	Sapio_Mantua_Hydrogen_Plant	Europe_wide	10.8489	45.1438	13.3822	0.537089	0.132121	9.25073	1.09785	0.533269	37.3281	54.5388	0.363524
277	Kutina_ammonia_plant_698	Kutina_ammonia_plant	Europe_wide	16.8009	45.4679	11.7468	0.319204	0.836248	1.27666	1.21825	1.02403	3.99606	7.18217	0.475
291	janikowskie_zak_ady_sodowe_janikosoda_sa_279	janikowskie_zak_ady_sodowe_janikosoda_sa	Europe_wide	18.1	52.75	8.45101	0.320698	0.0165413	0.90021	0.201842	0.0499517	3.15917	8.21445	0.305378
295	Kedzierzyn_Ammonia_Plant_714	Kedzierzyn_Ammonia_Plant	Europe_wide	18.2499	50.3162	13.1539	0.335165	0.0369548	0.851565	0.702545	0.208557	3.04598	6.76731	0.474179
306	Marsa_el_Brega_ammonia_I_745	Marsa_el_Brega_ammonia_I	Europe_wide	19.5989	30.4008	9.53428	0.356892	0.00114754	0.0488921	0.00128397	0.00117673	0.149438	0.201673	0.37402
309	Biezun_419	Biezun	Europe_wide	19.88	52.97	12.5308	0.319742	0.00827266	0.886242	0.102146	0.0474116	4.48513	8.80094	0.429423
318	Pulawy_Azoty_I_713	Pulawy_Azoty_I	Europe_wide	21.9853	51.4577	23.9889	0.408358	0.0196214	0.658529	0.146947	0.0735872	3.32751	7.06733	0.602172
333	sc_ghcl_upsom_romania_sa_319	sc_ghcl_upsom_romania_sa	Europe_wide	23.86	46.39	4.97631	0.22366	0.0897955	0.677042	0.649415	0.317966	2.63878	5.72418	0.349312
334	Grodno_ammonia_3_697	Grodno_ammonia_3	Europe_wide	23.9077	53.675	28.8215	0.394428	1.21037	3.13195	1.2826	1.24009	5.2768	8.04374	0.643647
341	Jonava_Ammonia_Plant_No_1_690	Jonava_Ammonia_Plant_No_1	Europe_wide	24.3423	55.0881	18.9138	0.369711	0.0152807	0.800424	9.25332	9.18392	11.8775	13.583	0.502345
344	Targu_705	Targu	Europe_wide	24.5088	46.5169	14.7312	0.249415	0.156761	0.912732	0.734172	0.404036	2.92509	5.85454	0.709422
373	sc_amonil_sa_slobozia_708	sc_amonil_sa_slobozia	Europe_wide	27.3848	44.5322	7.2084	0.247287	0.0810286	0.830666	0.662831	0.347728	4.19999	7.70132	0.344885
386	Basmakci_428	Basmakci	Europe_wide	30	37.88	6.82834	0.196831	0.0310772	0.836184	0.134935	0.082469	1.92813	3.49897	0.462244
387	Abu_Qir_Alexfert_Ammonia_plants_754	Abu_Qir_Alexfert_Ammonia_plants	Europe_wide	30.1005	31.2723	43.5988	1.0777	0.599927	3.77973	1.55641	1.1605	18.1494	46.6014	0.580628
389	Afyonkarahisar_427	Afyonkarahisar	Europe_wide	30.6	38.75	10.3075	0.16464	0.0195603	0.598602	0.152388	0.0700939	2.199	4.4926	0.680042
391	Acron_Novgorod_ammonia_I_689	Acron_Novgorod_ammonia_I	Europe_wide	31.2742	58.5256	14.676	0.362272	0.0386052	0.249983	0.339367	0.338482	0.822674	1.08098	0.390357
393	Suez_ammonia_plant_860	Suez_ammonia_plant	Europe_wide	31.3802	31.0549	47.8729	1.03623	0.385993	10.3208	2.08174	1.0425	53.0653	92.0372	0.666664
395	Cherkassy_ammonia_I_661	Cherkassy_ammonia_I	Europe_wide	32.0678	49.3753	14.3439	0.306181	1.24839	1.93321	1.36199	1.29993	3.68761	5.66397	0.479194
398	Konya_430	Konya	Europe_wide	32.5	37.75	14.4327	0.230925	0.0206078	1.01507	0.124225	0.0586987	2.48107	4.34715	0.659822
401	ch_nikodimou_sia_ltd_382	ch_nikodimou_sia_ltd	Europe_wide	33.09	35.06	13.7615	0.267924	0.0620611	0.704101	0.345016	0.188111	2.89559	3.82463	0.631467
405	Dnieprodzerzhinksk_ammonia_II_658	Dnieprodzerzhinksk_ammonia_II	Europe_wide	34.6576	48.488	11.3518	0.240807	0.674033	1.41326	0.776058	0.733785	2.62193	4.08458	0.483163
406	Haql_465	Haql	Europe_wide	34.97	29.26	23.427	0.597162	0.00132813	0.0767669	0.034157	0.0286777	1.61851	1.98578	0.613275
408	Al_Zarqa_Refinery_Hydrogen_Plant_529	Al_Zarqa_Refinery_Hydrogen_Plant	Europe_wide	36.1117	32.1232	10.4693	0.209098	0.117942	0.488929	0.519406	0.407603	1.54748	3.83896	0.636239
415	Cherepovets_ammonia_I_686	Cherepovets_ammonia_I	Europe_wide	37.9092	59.1323	9.7939	0.276874	0.132362	0.188951	0.287284	0.286412	0.572464	0.816455	0.353092
417	Horliwka_ammonia_I_652	Horliwka_ammonia_I	Europe_wide	38.103	48.3092	7.24158	0.224824	1.20577	1.98461	1.48084	1.31261	3.43589	6.0747	0.354482
418	Novomoskovsk_682	Novomoskovsk	Europe_wide	38.1708	54.0839	42.9978	0.408754	0.410093	0.718842	0.539898	0.517671	1.71725	2.95062	0.751232
426	Rossosh_ammonia_I_666	Rossosh_ammonia_I	Europe_wide	39.6784	50.1413	11.378	0.23084	0.0130865	0.430486	0.1985	0.189671	1.86372	3.40936	0.49786
429	Nevinnomyssk_I_684	Nevinnomyssk_I	Europe_wide	41.9515	44.661	35.8587	0.636607	0.0819097	0.520128	0.51827	0.110592	2.35019	4.66694	0.592013
436	Azot_Roustavi_694	Azot_Roustavi	Europe_wide	45.0585	41.5313	6.98377	0.336956	0.154077	1.02738	0.273321	0.232045	6.09631	10.1205	0.371618
440	Al_Qitar_420	Al_Qitar	Europe_wide	47.46	24.21	8.41477	0.274942	0.0311896	0.228373	0.17044	0.11893	0.809875	1.08967	0.421887
441	Khor_Al_Zubair_417	Khor_Al_Zubair	Europe_wide	47.8362	30.1871	18.6217	0.829046	0.0297028	0.201966	0.331958	0.192001	1.63363	4.93	0.403778
442	At_Tawdihiyah_421	At_Tawdihiyah	Europe_wide	47.95	24.22	18.4203	0.332682	0.0048613	0.332355	0.0257346	0.0242759	0.622683	0.91769	0.61488
448	Kuibyshev_ammonia_677	Kuibyshev_ammonia	Europe_wide	49.4533	53.5542	67.8203	0.753965	0.0892806	0.265055	0.39427	0.238064	0.96883	1.75311	0.714751
450	SAFCO_Ibn_Al-Baytar_ammonia_plants_762	SAFCO_Ibn_Al-Baytar_ammonia_plants	Europe_wide	49.5758	27.0728	44.6186	1.06507	0.523859	0.536951	0.946795	0.754347	0.830148	1.20897	0.584727
451	Togliatti_673	Togliatti	Europe_wide	49.6141	53.5437	79.1232	0.738189	0.0585072	0.24657	0.520012	0.372677	0.97776	2.03182	0.770805
452	ZMU_ammonia_nitrate_and_fertilizer_plant_403	ZMU_ammonia_nitrate_and_fertilizer_plant	Europe_wide	49.96	58.53	17.9035	0.333345	0.0193569	0.0901272	0.467947	0.466188	0.915914	1.26681	0.511845
457	Aktau_Ammonia_I_692	Aktau_Ammonia_I	Europe_wide	51.2625	43.6209	10.8439	0.382216	0.031896	0.0587216	0.0334015	0.0329652	0.0945746	0.160813	0.363196
470	Nezami_478	Nezami	Europe_wide	53.17	35.42	5.15732	0.20668	0.00282629	0.219203	0.0115609	0.00535792	0.920146	2.50725	0.325978
475	Salavat_ammonia_plant_674	Salavat_ammonia_plant	Europe_wide	55.9052	53.4002	18.0687	0.279457	0.081903	0.332533	0.174187	0.170321	1.07933	2.02775	0.592396
481	Berezniki_ammonia_I_688	Berezniki_ammonia_I	Europe_wide	56.7849	59.4132	40.2995	0.511599	0.0212178	0.138073	0.403897	0.403293	0.618972	0.743161	0.680129
482	Bojnurd_ammonia_plant_777	Bojnurd_ammonia_plant	Europe_wide	57.5108	37.5192	14.0866	0.311398	0.0513898	0.722938	0.0900523	0.07698	2.24496	4.06367	0.590266
491	Mary_ammonia_I_663	Mary_ammonia_I	Europe_wide	61.844	37.4848	12.2198	0.403939	0.0284428	0.432877	0.0766686	0.0740038	1.76224	2.92527	0.367039
492	Navoiy_ammonia_I-II_647	Navoiy_ammonia_I-II	Europe_wide	65.3298	40.1114	28.3082	0.551714	0.0111968	1.55856	0.017975	0.0164685	4.47499	7.20856	0.523549
495	Vakhsh_ammonia_plant_664	Vakhsh_ammonia_plant	Europe_wide	68.8347	37.6797	9.24065	0.418107	0.235021	0.308035	1.85844	0.887325	1.20177	3.21043	0.377565
497	Engro_Daharki_Mirpur_Mathelo_Ammonia_Plant_781	Engro_Daharki_Mirpur_Mathelo_Ammonia_Plant	Europe_wide	69.6719	28.0383	59.8388	1.97865	0.514417	4.01908	5.33557	2.8399	15.4225	28.3755	0.393301
23	Madera_157	Madera	North_America	-120.36	37.02	20.3974	0.670478	0.085807	6.57827	2.44164	0.676349	20.5477	38.8504	0.456638
32	Yakima_Valley_Sunnyside_177	Yakima_Valley_Sunnyside	North_America	-120	46.33	29.1131	0.386515	0.0243985	1.84048	0.147986	0.0509368	4.50653	5.98196	0.701759
38	San_Joaquin_Bakersfield_Refinery_Plants_168	San_Joaquin_Bakersfield_Refinery_Plants	North_America	-119.049	35.3988	39.6138	1.02163	3.95706	6.59444	5.03572	4.61135	11.6197	17.0174	0.591829
42	Chino_153	Chino	North_America	-117.56	33.99	21.0769	0.499637	5.90301	9.47885	14.7953	12.9268	19.563	23.0452	0.660057
48	Jerome_Wendell_164	Jerome_Wendell	North_America	-114.57	42.75	32.8677	0.476858	0.0707219	7.42339	0.443133	0.407149	17.2064	24.53	0.69923
53	Oakley_165	Oakley	North_America	-113.92	42.3	24.2002	0.420181	0.00188001	1.60833	0.954152	0.0206805	5.47907	13.8129	0.679178
56	Carseland_ammonia_plant_314	Carseland_ammonia_plant	North_America	-113.591	50.8443	7.04093	0.228918	1.75954	2.20553	2.63828	1.97536	3.82846	7.48581	0.352881
59	Milford_175	Milford	North_America	-113.14	38.23	11.9202	0.198378	0.00122036	0.838538	0.0268636	0.00864927	2.65807	5.04128	0.577998
61	Lethbridge_26	Lethbridge	North_America	-112.8	49.9	42.4194	0.373159	0.0323895	2.6413	0.0890552	0.0783491	6.48767	7.82667	0.80548
62	Delta_174	Delta	North_America	-112.51	39.37	7.035	0.168421	0.00476118	0.839058	0.143475	0.111188	1.61355	2.36196	0.519026
63	Stanfield_149	Stanfield	North_America	-112	32.9	22.3204	0.381301	0.0207061	0.994603	0.176857	0.129058	2.46734	4.72112	0.709056
75	Hatch_170	Hatch	North_America	-107.28	32.59	9.60741	0.192976	0.00501006	0.581433	0.13552	0.0302182	2.58836	3.6462	0.582473
76	Vado_171	Vado	North_America	-106.63	32.12	11.1293	0.195504	0.114456	3.48592	0.513088	0.24432	5.66164	7.64385	0.621499
78	Delicias_141	Delicias	North_America	-105.42	28.2	13.5741	0.230685	0.0527766	0.468673	0.0560764	0.0554508	0.786089	1.00736	0.673799
86	Torreon_147	Torreon	North_America	-103.51	25.69	71.3545	0.965708	0.0352929	0.701744	0.0831394	0.0703125	2.10639	4.18098	0.812869
88	Acatic_138	Acatic	North_America	-102.9	20.78	26.5352	0.556776	0.00899109	1.79276	0.190034	0.0855829	4.10248	8.87606	0.639248
89	Eckley_Yuma_160	Eckley_Yuma	North_America	-102.57	40.14	24.5955	0.44608	0.00227608	1.26488	0.0116985	0.00608011	4.47819	9.65485	0.571341
90	Vista_Hermosa_de_Negrete_Los_Charcos_148	Vista_Hermosa_de_Negrete_Los_Charcos	North_America	-102.45	20.26	16.2407	0.487379	0.0157936	0.66288	0.141099	0.0687474	4.78932	8.7507	0.507433
91	Amarillo_34	Amarillo	North_America	-102.4	34.8	35.3596	0.675522	0.00811728	5.72213	0.0212212	0.0149985	15.5255	27.7435	0.564641
92	Jalostotitlan_San_Juan_de_Los_Lagos_143	Jalostotitlan_San_Juan_de_Los_Lagos	North_America	-102.38	21.26	41.3918	0.719725	0.00531945	2.17867	0.0822411	0.023823	7.9974	13.3791	0.702894
96	Great_Plains_Synfuels_Plant_381	Great_Plains_Synfuels_Plant	North_America	-101.836	47.3579	12.02	0.371063	5.55906	5.71913	5.57299	5.56072	6.27569	7.43143	0.338142
98	Monclova_185	Monclova	North_America	-101.43	26.88	7.33025	0.209927	0.0113806	0.244127	0.0553525	0.012773	1.00597	2.11673	0.541234
100	Salamanca_ammonia_plant_315	Salamanca_ammonia_plant	North_America	-101.177	20.5871	6.77731	0.33003	0.282659	1.77766	0.51907	0.405123	5.67611	10.1777	0.343226
102	Garden_City_166	Garden_City	North_America	-100.84	37.81	36.098	0.63035	0.0126965	4.40915	0.13899	0.0996565	12.2063	21.2457	0.55553
107	Ezequiel_Montes_142	Ezequiel_Montes	North_America	-99.91	20.68	17.7025	0.532032	0.00896986	1.11091	0.162126	0.0596863	3.3255	6.97602	0.524519
128	Wisner_168	Wisner	North_America	-96.93	41.97	33.5454	1.25481	0.00448486	3.1402	0.0768717	0.0339555	11.7704	21.6118	0.331239
134	Sioux_163	Sioux	North_America	-96.3	43.15	33.0969	0.937341	0.0300998	5.32301	0.198683	0.0500697	17.4328	32.4307	0.399345
150	Cosoleacaqua_IV_317	Cosoleacaqua_IV	North_America	-94.5642	18.0077	11.862	0.590018	0.188053	1.13673	0.290099	0.275441	3.41955	5.71764	0.338659
177	Donaldsonville_Faustina_ammonia_plants_301	Donaldsonville_Faustina_ammonia_plants	North_America	-90.9577	30.0987	14.002	0.4992	10.9953	11.3007	24.6727	20.1615	20.7566	25.7431	0.38853
227	Royston_162	Royston	North_America	-83.11	34.29	16.5634	0.379402	0.0287029	6.96959	0.374364	0.112662	15.6336	23.0897	0.561043
237	Augusta_ammonia_plant_280	Augusta_ammonia_plant	North_America	-81.9302	33.4435	13.2527	0.377	2.04828	2.35191	2.22608	2.1792	3.25088	4.71568	0.453796
259	Bridgewater_176	Bridgewater	North_America	-79.01	38.42	14.0974	0.395505	0.0554648	4.19556	0.211148	0.114308	9.00971	13.6606	0.447355
262	North_Carolina_123	North_Carolina	North_America	-78.02	35.1	21.755	0.542296	0.0225895	18.402	0.217408	0.0862859	46.5646	61.2922	0.494424
272	Moa_172	Moa	North_America	-74.8881	20.6372	15.1114	0.483939	0.0137199	0.0925223	0.0675859	0.033746	0.591092	1.24	0.413849
38	Sasol_Synfuels_220	Sasol_Synfuels	Africa	29.1879	-26.5595	24.7628	0.65436	0.173356	0.68955	0.440131	0.27425	2.23806	5.26642	0.496555
41	Alexandria_Refinery_Hydrogen_Plant_100	Alexandria_Refinery_Hydrogen_Plant	Africa	29.8443	31.143	16.0614	0.57346	0.859978	2.72499	1.31194	1.28506	21.7309	35.5862	0.389546
43	Abu_Qir_Ammonia_I_187	Abu_Qir_Ammonia_I	Africa	30.1005	31.2723	25.8329	0.534448	0.599927	3.77973	1.55641	1.1605	18.1494	46.6014	0.592537
45	Delta_Suez_Ammonia_plants_180	Delta_Suez_Ammonia_plants	Africa	31.3995	31.0723	26.2245	0.693014	0.385993	10.3208	2.08174	1.0425	53.0653	92.0372	0.523358
48	Omdurman_8	Omdurman	Africa	32.45	15.6	13.9672	0.434193	1.84827	2.32282	4.88786	3.00173	4.2912	7.7863	0.425228
54	Lake_Natron_34	Lake_Natron	Africa	35.99	-2.47	15.1508	0.58904	0.00950609	0.111402	0.125594	0.0531686	0.886025	1.99593	0.454295
70	SAFCO_Samad_Ibn_Al-Baytar_ammonia_plants_194	SAFCO_Samad_Ibn_Al-Baytar_ammonia_plants	Africa	49.5758	27.0728	24.0638	0.647254	0.523859	0.536951	0.946795	0.754347	0.830148	1.20897	0.46306
82	Shiraz_Ammonia_I_205	Shiraz_Ammonia_I	Africa	52.7361	29.8905	26.0034	0.521355	0.012957	0.950247	0.220843	0.06614	2.91716	5.3886	0.612979
98	OMIFCO_Ammonia_I_201	OMIFCO_Ammonia_I	Africa	59.4264	22.6392	14.1745	0.400773	0.00077848	0.00815079	0.0952441	0.0868636	0.226142	0.253778	0.51486
17	Yankuang_Xinjiang_Coal_Chemicals_Co_Ltd_556	Yankuang_Xinjiang_Coal_Chemicals_Co_Ltd	China	81.05	44	8.84238	0.354604	0.0463464	2.37506	0.279781	0.203171	9.6522	12.4104	0.389633
18	Xinjiang_Tianying_Glycol_Plant_239	Xinjiang_Tianying_Glycol_Plant	China	81.217	40.6132	19.2977	0.600546	0.04477	2.63896	0.10419	0.0893437	4.67776	4.98773	0.428884
19	CPI_Yili_SNG_Plant_498	CPI_Yili_SNG_Plant	China	81.2241	43.9569	9.84569	0.381045	0.0340713	1.90441	0.268677	0.164925	8.41968	12.7521	0.42515
20	Yili_SNG_plants_424	Yili_SNG_plants	China	81.4241	43.9169	10.4685	0.381889	0.0694598	3.99733	0.211121	0.145125	8.14887	11.672	0.454517
28	Kuitun_Ammonia_Plant_505	Kuitun_Ammonia_Plant	China	84.9033	44.4265	13.4581	0.626837	0.0247645	1.51368	0.150137	0.0890807	6.49581	11.1881	0.384744
32	Kemerovo_Ammonia_I_203	Kemerovo_Ammonia_I	China	86.0623	55.345	18.0843	0.264848	0.0839311	0.152924	0.412551	0.390599	0.816197	1.26566	0.628255
38	Henan_Coal_Changji_SNG_Plant_421	Henan_Coal_Changji_SNG_Plant	China	87.2582	44.0112	14.1858	0.592166	0.0813038	4.76345	0.299628	0.209466	12.4123	16.8224	0.38857
39	Huadian_Changji_Ammonia_Plant_406	Huadian_Changji_Ammonia_Plant	China	87.3582	44.0612	18.2301	0.676588	0.0570158	3.30151	0.290186	0.196061	11.3259	16.1799	0.426612
42	Urumqi_Ammonia_Plants_638	Urumqi_Ammonia_Plants	China	87.6668	43.8256	18.9345	0.774149	0.014052	1.02517	0.232188	0.114351	6.42185	12.78	0.38647
43	Midong-Fukang_48	Midong-Fukang	China	87.7	43.95	30.3234	0.721648	0.0191353	1.21258	0.198732	0.0926486	5.66827	11.1135	0.582001
47	Wucaiwan_49	Wucaiwan	China	89.19	44.92	26.2995	0.508047	0.00285495	0.00285495	0.0190558	0.00953316	0.00953316	0.0190558	0.589097
52	Abakan_83	Abakan	China	91.03	53.73	9.17135	0.215636	0.00139967	0.083412	0.0590275	0.0572865	0.540288	1.03809	0.471354
58	ChaerhanSaltLake_29	ChaerhanSaltLake	China	95.32	36.73	9.87188	0.36337	0.00612342	0.215243	0.0280435	0.0162742	0.478809	0.809398	0.357652
64	Gansu_Jinchang_Syngas_Plant_110	Gansu_Jinchang_Syngas_Plant	China	102.08	38.3708	14.7601	0.405362	0.0145742	0.367017	0.195885	0.0911798	2.70705	5.96197	0.479281
66	Anning_Yuntianhua_602	Anning_Yuntianhua	China	102.478	24.9195	19.6308	1.64855	0.0783819	2.171	0.533021	0.264834	6.98549	13.7671	0.364581
71	Kaiyuan_50	Kaiyuan	China	103.26	23.75	32.4101	0.934115	0.0466681	1.10526	0.524079	0.209326	5.1107	12.5368	0.587578
72	Yongjing_68	Yongjing	China	103.27	36.01	19.7243	0.453352	0.0462548	1.51224	0.373687	0.174695	6.27304	12.8692	0.619272
74	Dongpo_32	Dongpo	China	103.8	30.04	19.9169	1.03558	0.152213	3.91561	1.34439	0.688424	17.1663	34.0283	0.461347
78	Panjiangzhen-Yanfangxiang_51	Panjiangzhen-Yanfangxiang	China	103.92	25.78	17.4393	1.15192	0.0756538	1.69527	0.629345	0.304513	6.84971	14.817	0.328867
80	Wenshan_Fuel_Gas_Plant_473	Wenshan_Fuel_Gas_Plant	China	104.216	23.4007	9.82963	0.579622	0.0896693	2.15241	0.598754	0.300844	7.13359	14.1633	0.324299
81	Deyang-Guanghan-Xindu_31	Deyang-Guanghan-Xindu	China	104.24	30.87	20.0511	1.02399	0.155681	4.26477	1.41331	0.729903	20.438	39.8713	0.45204
84	Xingyi-Qianxinan_11	Xingyi-Qianxinan	China	104.88	25.21	19.1637	1.0435	0.143991	2.93227	0.943103	0.433399	8.68287	18.1382	0.343748
87	Sichuan_Lutianhua_522	Sichuan_Lutianhua	China	105.442	28.8718	13.3164	0.860664	0.15946	3.97317	1.40862	0.750564	17.9556	32.9091	0.325362
90	Ningxia_Baofeng_Methanol_Plant_241	Ningxia_Baofeng_Methanol_Plant	China	106.063	38.4797	32.5721	0.76035	0.111891	3.79975	0.497987	0.268615	8.79957	16.2674	0.572752
91	PetroChina_Ningxia_Ammonia_Plant_612	PetroChina_Ningxia_Ammonia_Plant	China	106.181	38.4719	27.1518	0.803799	0.0885453	3.25683	0.533551	0.278262	9.08638	17.308	0.483449
92	Qinghua_Group_Methanol_Plant_270	Qinghua_Group_Methanol_Plant	China	106.198	37.9975	16.7002	0.621948	0.117463	4.23321	0.501391	0.280495	8.30389	13.8165	0.40311
99	Juitai_Energy_Ordos_MEG_Plant_247	Juitai_Energy_Ordos_MEG_Plant	China	106.704	39.4724	28.4581	0.63843	0.0143588	0.36126	0.147328	0.0466394	1.05009	4.11201	0.548435
100	Xiaozhaibazhen_10	Xiaozhaibazhen	China	106.72	27.18	25.5251	1.17568	0.126937	2.1825	0.918722	0.484263	8.46177	16.6547	0.433234
106	Jizhong_Bayannur_Ammonia_Plant_279	Jizhong_Bayannur_Ammonia_Plant	China	107.388	40.7432	12.9815	0.458513	0.0360886	1.59069	0.27491	0.170831	7.48085	12.1697	0.375611
112	Jinnui_Neimeng_Wuyuan_517	Jinnui_Neimeng_Wuyuan	China	108.268	41.0884	10.4991	0.431855	0.0523972	2.57293	0.182759	0.125018	6.05639	8.18418	0.31813
114	Xingping_Ethanol_Plant_116	Xingping_Ethanol_Plant	China	108.415	34.2993	19.511	0.635453	0.217963	4.25985	1.15695	0.691843	13.3885	21.2911	0.562574
117	Wulashan_26	Wulashan	China	108.73	40.68	16.9693	0.450732	0.0277403	1.06065	0.143871	0.0863146	3.53658	5.80975	0.478195
124	Pucheng_Weinan_MTO_Plant_328	Pucheng_Weinan_MTO_Plant	China	109.407	34.4955	31.0596	1.14935	0.207987	4.13279	1.23088	0.61445	11.8587	22.4405	0.497438
125	Weihe_Ammonia_Plant_III_588	Weihe_Ammonia_Plant_III	China	109.51	34.5	35.7103	1.1808	0.192527	3.75045	1.09553	0.595245	11.2921	19.9947	0.549444
129	Baotou_72	Baotou	China	109.68	40.66	23.5892	0.446698	0.0449945	1.79612	0.223	0.13017	5.66419	9.36268	0.602129
130	Guapozhen_38	Guapozhen	China	109.7	34.43	51.543	1.38668	0.0996769	1.7429	1.04256	0.484531	8.1897	17.967	0.60987
134	Shenhua_Baotou_MEG_Plant_88	Shenhua_Baotou_MEG_Plant	China	109.84	40.658	17.2369	0.447553	0.045361	1.82778	0.240113	0.134765	5.78394	10.0812	0.481747
140	Shenhua_Erdos_600	Shenhua_Erdos	China	110.157	39.3282	10.8981	0.409398	0.0262896	0.598174	0.248877	0.1334	3.26713	6.26934	0.350699
143	Sanwei_Neimenggu_Methanol_Plant_508	Sanwei_Neimenggu_Methanol_Plant	China	110.2	39	13.7423	0.461757	0.0657336	1.15527	0.318504	0.196085	3.82184	6.27687	0.378829
144	Sunjiachazhen_77	Sunjiachazhen	China	110.36	39.15	18.7112	0.401452	0.0481922	1.23072	0.33813	0.164612	3.85802	8.21853	0.545875
148	Linyi_Ammonia_Plant_302	Linyi_Ammonia_Plant	China	110.748	35.1218	23.8782	0.99888	0.202896	4.2156	1.15915	0.591278	12.0025	26.4749	0.451725
150	Jishan_Ammonia_Plant_386	Jishan_Ammonia_Plant	China	110.983	35.604	29.0397	1.00493	0.183345	3.68221	1.04308	0.571803	11.2396	19.8419	0.521197
155	Chuxing_Yichang_Ammonia_Plant_113	Chuxing_Yichang_Ammonia_Plant	China	111.451	30.4758	33.5221	1.24435	0.14928	3.06472	0.958901	0.494034	9.52129	16.5234	0.43941
156	Hubei_Yihua_Ammonia_Plant_118	Hubei_Yihua_Ammonia_Plant	China	111.65	30.3904	57.9654	1.38123	0.157361	3.30074	1.00122	0.503935	10.6316	20.3937	0.591535
161	Sinopec_Zhijiang_611	Sinopec_Zhijiang	China	111.75	30.4167	42.829	1.34761	0.129864	2.89521	0.977333	0.500472	11.1627	20.8066	0.485619
169	Jiaocheng_42	Jiaocheng	China	112.2	37.58	20.9968	0.817709	0.148331	2.5419	0.836812	0.439514	7.74659	14.6733	0.4534
170	Hujizhen-Shuanghe-Linkuang_14	Hujizhen-Shuanghe-Linkuang	China	112.27	31.33	28.1443	1.12088	0.0937246	2.34053	0.886774	0.422166	8.66084	18.989	0.388671
171	Yangquan_Qingxu_Ammonia_Plant_367	Yangquan_Qingxu_Ammonia_Plant	China	112.359	37.6074	18.3204	0.830345	0.181259	3.46946	0.867758	0.487563	8.80715	15.255	0.40351
174	Yangcheng_Methanol_Plant_98	Yangcheng_Methanol_Plant	China	112.477	35.5001	29.6147	1.31378	0.138278	2.39258	0.913357	0.435166	7.43189	23.1246	0.404656
175	Taiyuan_Ammonia_Plant_304	Taiyuan_Ammonia_Plant	China	112.48	37.779	13.7844	0.69744	0.145289	2.64012	0.836947	0.426041	7.43459	14.7782	0.36147
178	Luoyang_MEG_Plant_321	Luoyang_MEG_Plant	China	112.523	34.6935	20.6499	1.24702	0.2395	12.9943	1.51995	0.783321	42.1326	79.1905	0.315077
179	Beiliuzhen_40	Beiliuzhen	China	112.6	35.46	38.7035	1.53995	0.0872934	1.50023	0.932104	0.40952	7.23105	28.0162	0.428471
181	Shanxi_Qiyi_MTO_Plant_266	Shanxi_Qiyi_MTO_Plant	China	112.851	36.364	27.965	1.24215	0.107784	2.16746	0.854107	0.422152	7.98236	15.9539	0.368683
182	Zezhou-Gaoping_46	Zezhou-Gaoping	China	112.87	35.64	37.9414	1.96189	0.100518	1.9625	0.981019	0.45125	8.67916	24.269	0.340755
184	Shanxi_Lu_CTL_Plant_471	Shanxi_Lu_CTL_Plant	China	112.931	36.4366	29.534	1.14257	0.0911793	1.85188	0.853	0.437994	8.34197	15.9861	0.407173
187	Xiangyuan_Qiyi_Changzhi_Methanol_Plant_298	Xiangyuan_Qiyi_Changzhi_Methanol_Plant	China	113.105	36.3239	34.438	1.24541	0.160853	3.07645	0.946798	0.493675	9.57156	18.4557	0.423432
191	Shanxi_Ammonia_Plant_626	Shanxi_Ammonia_Plant	China	113.229	36.3341	29.0307	1.20464	0.10238	1.92702	0.994495	0.511918	10.7903	21.0736	0.377945
193	Datong_572	Datong	China	113.35	40.0768	7.66382	0.374178	0.12945	2.2871	0.731577	0.402669	7.61836	14.5527	0.311566
196	Hubei_Shuanghuan_Chemical_613	Hubei_Shuanghuan_Chemical	China	113.567	30.9333	41.6048	1.28543	0.118578	3.00219	1.11449	0.571023	13.9434	25.681	0.465352
197	Henan_Jindadi_Ammonia_Plant_117	Henan_Jindadi_Ammonia_Plant	China	113.609	33.4379	27.6976	1.36347	0.172735	8.71104	1.69448	0.850905	41.9605	83.8947	0.314704
198	Pingsongxiang_44	Pingsongxiang	China	113.66	37.25	23.5529	1.06281	0.0714155	0.915451	0.77436	0.281935	4.16935	13.1134	0.357385
199	Henan_Zhongxin_Chemical_Works_534	Henan_Zhongxin_Chemical_Works	China	113.667	35.2667	49.471	1.70558	0.170358	9.3184	1.44287	0.759088	38.975	70.8649	0.467687
201	Haohua_Zhumadian_Ammonia_Phase_1_272	Haohua_Zhumadian_Ammonia_Phase_1	China	114.04	32.9833	26.2331	1.19658	0.250672	11.7667	1.62971	0.827896	38.6855	74.4303	0.321099
208	Henan_Jinkai_531	Henan_Jinkai	China	114.3	34.8	36.911	1.83752	0.238434	13.4322	1.68367	0.824303	45.6708	93.8582	0.319877
209	Hebei_Yangmei_Zhengyuan_Ammonia_Plant_402	Hebei_Yangmei_Zhengyuan_Ammonia_Plant	China	114.378	38.3064	39.6812	1.39803	0.291281	8.37104	1.6455	0.876981	24.0919	43.9531	0.44741
211	Jinshi_Shijiazhuang_Ammonia_Plants_475	Jinshi_Shijiazhuang_Ammonia_Plants	China	114.498	38.0436	35.7405	1.41738	0.182779	5.35889	1.86343	0.938593	26.6027	52.6872	0.39609
212	Shijiazhuang-Gaocheng_16	Shijiazhuang-Gaocheng	China	114.77	38.09	32.8528	1.49244	0.299371	8.62471	2.01185	0.995087	29.1472	59.5441	0.341722
224	Anhui_Haoyuan_Chemical_528	Anhui_Haoyuan_Chemical	China	115.817	32.9	28.1775	1.04452	0.242116	5.4659	1.61237	0.806813	17.8649	35.9108	0.388656
240	Huaihua_Anhui_Ammonia_Plant_485	Huaihua_Anhui_Ammonia_Plant	China	116.96	32.61	28.3142	0.980101	0.219005	4.15191	1.53324	0.740502	14.395	30.5446	0.425688
258	Jiutai_Linyi_MEG_Plant_252	Jiutai_Linyi_MEG_Plant	China	118.258	35.0218	27.4616	1.0972	0.297985	9.11348	2.05683	0.995213	27.8542	53.8594	0.348044
261	Linyi_Methanol_Plant_365	Linyi_Methanol_Plant	China	118.356	35.1047	26.5406	1.17284	0.298608	9.38095	2.02474	0.993254	27.4157	52.9214	0.320376
262	Linyi_35	Linyi	China	118.47	34.94	38.1522	1.19456	0.205003	5.60565	2.17497	1.08623	26.7616	53.0464	0.434062
270	Shouguang_36	Shouguang	China	118.81	36.93	45.9265	1.11515	0.181427	4.94992	1.54281	0.873446	24.6187	42.8242	0.510939
280	Hulunbeier_Ammonia_Plant_539	Hulunbeier_Ammonia_Plant	China	119.716	49.2116	10.3047	0.285877	0.0288369	1.16026	0.10321	0.0733513	2.69724	3.29635	0.38801
284	Formosa_Petrochemical_Corporation_137	Formosa_Petrochemical_Corporation	China	120.204	23.8011	13.9301	0.648795	0.695338	4.32388	3.53387	1.97728	9.10213	15.7634	0.319005
288	Pingtung_3	Pingtung	China	120.54	22.64	22.7004	0.607812	0.622528	1.73006	4.59213	2.3208	5.46493	9.68538	0.530684
301	Mulituzhen_24	Mulituzhen	China	122.24	43.46	18.0401	0.481854	0.0130081	0.759914	0.1233	0.0586411	3.20784	5.53452	0.428253
302	Tongliao_GEM_I_256	Tongliao_GEM_I	China	122.243	43.6529	17.7755	0.465211	0.0171647	1.12714	0.135732	0.0721233	3.74168	6.40826	0.430655
304	Hongyu_Zalantun_Ammonia_Plant_313	Hongyu_Zalantun_Ammonia_Plant	China	122.763	47.9959	16.159	0.339408	0.0238754	0.814785	0.172233	0.0793673	2.82817	6.13167	0.504698
305	HulanErgi_17	HulanErgi	China	123.67	47.19	18.6639	0.433662	0.0604759	2.15539	0.27894	0.160612	5.74714	9.89003	0.440534
306	Changshan_20	Changshan	China	124.52	45.32	12.3518	0.486179	0.0476157	2.19195	0.316301	0.164657	7.66512	14.0189	0.306799
307	Daqing_Oxochemicals_Plant_640	Daqing_Oxochemicals_Plant	China	125.05	46.5833	14.2754	0.406245	0.047418	1.17651	0.303076	0.152008	4.16782	9.30108	0.381915
315	Yochon_Oxochemicals_Plant_616	Yochon_Oxochemicals_Plant	China	126.891	35.8052	17.0834	0.608364	0.402809	0.402809	1.02511	0.683732	0.683732	1.02511	0.400317
317	Anseong-Icheon_1	Anseong-Icheon	China	127.42	37.12	26.239	0.69303	0.245518	0.245518	2.3429	1.03736	1.03736	2.3429	0.520484
0	Karachi_Power_Plant_118	Karachi_Power_Plant	India	67.1385	24.7842	58.895	1.7358	2.38296	2.90154	6.12496	4.42539	7.5158	11.8439	0.502057
2	Vakhsh_Ammonia_Plant_68	Vakhsh_Ammonia_Plant	India	68.8347	37.6797	9.34876	0.420819	0.235021	0.308035	1.85844	0.887325	1.20177	3.21043	0.37924
3	Engro_Daharki_Mirpur_Mathelo_Ammonia_Plants_76	Engro_Daharki_Mirpur_Mathelo_Ammonia_Plants	India	69.6719	28.0383	59.8388	1.97865	0.514417	4.01908	5.33557	2.8399	15.4225	28.3755	0.393301
5	Fatima_Sadiqabad_Machhi_Ammonia_Plants_50	Fatima_Sadiqabad_Machhi_Ammonia_Plants	India	70.0305	28.2616	74.006	1.93225	0.617978	3.43402	5.87325	3.0623	15.7917	26.5393	0.471341
9	Essar_Hazira_63	Essar_Hazira	India	72.6547	21.1048	38.2436	1.06287	2.57377	5.09988	6.69151	4.23647	11.3982	20.8078	0.507202
10	Thal_I_83	Thal_I	India	72.8717	18.7025	34.1553	0.976511	1.85208	3.00566	17.2435	4.1228	7.83949	25.0196	0.527333
11	Trombay_V_84	Trombay_V	India	72.8871	19.0413	38.1544	0.882745	7.16782	8.00255	20.7735	15.5095	19.7172	29.2401	0.609664
14	Ankleshwar_5	Ankleshwar	India	72.99	21.58	24.3198	1.00311	1.16676	5.92565	8.39036	3.12436	17.1317	35.5623	0.366383
15	Narmada_Ammonia_Methanol_Plant_130	Narmada_Ammonia_Methanol_Plant	India	73.0076	21.7356	23.7267	1.04527	0.835983	4.00858	8.85182	3.41438	18.0218	37.8342	0.346998
21	Zuari_Ammonia_Plant_78	Zuari_Ammonia_Plant	India	73.8732	15.3748	14.7603	0.764437	0.637849	1.04614	3.15038	1.66096	4.39105	8.26365	0.335319
25	Kota_Ammonia_Plant_81	Kota_Ammonia_Plant	India	75.8897	25.1366	25.9964	1.14968	1.08975	3.54673	6.82085	4.00213	15.815	29.7948	0.301457
31	Vijaipur_I_87	Vijaipur_I	India	77.1499	24.4967	34.3007	1.17019	0.583829	3.62171	4.12681	2.11432	12.4512	24.6539	0.372497
36	Namakkal_1	Namakkal	India	78.16	11.24	18.4475	0.7712	0.979117	3.77465	11.4413	5.46304	20.6402	43.1651	0.354031
38	Hyderabad_0	Hyderabad	India	78.49	17.41	30.9795	1.10018	2.48294	7.32497	9.0286	5.51468	21.0312	38.9167	0.383549
63	Chaerhan_Salt_Lake_4	Chaerhan_Salt_Lake	India	95.32	36.73	9.87255	0.363314	0.00612342	0.215243	0.0280435	0.0162742	0.478809	0.809398	0.357752
64	Namrup_II_101	Namrup_II	India	95.3535	27.1783	22.7953	1.10958	0.762326	1.88857	5.17273	2.86518	7.41006	12.9546	0.495208
3	Cartavio_Chicama_Trujillo_6	Cartavio_Chicama_Trujillo	South_America	-79.06	-7.98	16.8121	0.628965	0.0753102	0.471254	0.152407	0.147111	1.29447	2.1207	0.570467
4	Tiroles_El_Condor_13	Tiroles_El_Condor	South_America	-77.54	-10.98	17.1222	0.637883	0.00756547	0.477134	0.0280056	0.0188904	1.3255	2.6307	0.587075
5	Irrigacion_Santa_Rosa_8	Irrigacion_Santa_Rosa	South_America	-77.38	-11.25	12.5994	0.767602	0.00390513	0.152526	0.0342016	0.0153672	1.12245	2.84632	0.435057
8	Punta_Hermosa_11	Punta_Hermosa	South_America	-76.79	-12.28	21.995	0.934611	0.234776	0.413873	1.41738	0.958057	2.05542	3.49713	0.542935
10	Alto_Laran_District_4	Alto_Laran_District	South_America	-76.04	-13.44	19.8329	0.711483	0.0121247	0.142744	0.0366247	0.0170401	1.14468	2.3399	0.584809
14	Santander_Dept_Bucaramanga_3	Santander_Dept_Bucaramanga	South_America	-73.12	7.05	7.85876	0.353876	0.276268	0.816288	0.399245	0.327694	3.07456	6.93496	0.450488
16	Vitor_District_Arequipa_14	Vitor_District_Arequipa	South_America	-71.7	-16.44	6.56453	0.226394	0.140172	0.274102	0.155515	0.152807	0.686415	1.13042	0.596776
17	La_Manga_1	La_Manga	South_America	-71.59	-33.9	12.1913	0.467732	0.0134098	1.85672	0.190984	0.0843278	4.90332	7.98014	0.455641
18	Las_Chacras_2	Las_Chacras	South_America	-71.57	-34.23	7.6502	0.440721	0.00802743	0.728874	0.161274	0.0495726	3.79706	8.57045	0.306601
46	Duque_de_Caxias_Refinery_Hydrogen_Plant_40	Duque_de_Caxias_Refinery_Hydrogen_Plant	South_America	-43.2643	-22.7219	12.6144	0.58952	2.26892	2.74602	9.66884	6.35239	8.55924	13.4957	0.375987
51	Sergipe_Ammonia_Plant_89	Sergipe_Ammonia_Plant	South_America	-37.1432	-10.771	14.9148	0.642097	0.0381094	0.463549	0.675667	0.47243	2.68703	5.71505	0.454883
7	Thung_Luang_Chom_Bueng_4	Thung_Luang_Chom_Bueng	South_East_Asia	99.69	13.39	17.6416	0.628805	1.26675	3.54648	5.7572	3.21707	9.19482	17.6497	0.410367
11	Bangchak_Refinery_Hydrogen_Plant_39	Bangchak_Refinery_Hydrogen_Plant	South_East_Asia	100.593	13.6868	13.7306	0.565108	6.63307	8.93195	21.0777	17.6085	25.339	32.9428	0.336027
28	Palembang_18	Palembang	South_East_Asia	104.71	-2.83	70.6183	1.80052	0.84676	3.64187	4.61452	2.44465	16.7172	30.0828	0.541596
30	Pusri_IB_95	Pusri_IB	South_East_Asia	104.806	-2.97587	101.119	1.60475	1.01653	5.46138	4.72831	2.5557	17.3903	32.1831	0.716345
45	Kujang_Ammonia_Plants_83	Kujang_Ammonia_Plants	South_East_Asia	107.429	-6.40623	14.5636	0.456656	4.54935	8.75298	24.6454	13.188	26.8615	50.1917	0.468084
52	Gresik_Ammonia_Plant_91	Gresik_Ammonia_Plant	South_East_Asia	112.638	-7.1525	38.2921	0.566488	2.31516	4.11123	12.877	8.27221	16.0259	25.4818	0.717474
61	Kaltim_Parna_Ammonia_Plant_84	Kaltim_Parna_Ammonia_Plant	South_East_Asia	117.496	0.176768	61.3977	1.04166	0.198037	0.343008	1.59656	0.519302	1.12013	2.97732	0.745139
10	Yabulu_54	Yabulu	Australia	146.617	-19.193	7.67489	0.374053	0.0347375	0.111886	0.0583661	0.0572314	0.290629	0.475084	0.329783
12	rivalea_australia_corowa_6	rivalea_australia_corowa	Australia	146.33	-35.97	5.45904	0.199728	0.00127492	0.351326	0.0330838	0.017249	1.63318	2.82694	0.323782
13	riverina_feedlot_7	riverina_feedlot	Australia	146.48	-34.64	4.94987	0.193823	0.00181927	0.255196	0.0133622	0.0077204	1.25991	2.404	0.304583
25	caroona_feedlot_18	caroona_feedlot	Australia	150.38	-31.39	6.0372	0.186449	0.000996836	0.268473	0.011682	0.00497881	1.08913	2.14541	0.416001
27	killara_feedlot_20	killara_feedlot	Australia	150.59	-31.47	5.00842	0.189478	0.000552208	0.191556	0.0182781	0.00260394	0.947671	2.36443	0.35988
32	whyalla_feedlot_25	whyalla_feedlot	Australia	151.05	-28.75	5.44436	0.221517	0.000130313	0.0965713	0.00211541	0.000961072	0.588059	1.93902	0.354045
35	sandalwood_feedlot_28	sandalwood_feedlot	Australia	151.43	-27.14	7.2065	0.256546	0.00564365	0.135763	0.0645459	0.0100403	0.807206	2.46949	0.381872
8	Thung_Luang_Chom_Bueng	99.69												13.39
12	Bangchak_Refinery_Hydrogen_Plant	100.593												13.6868
23	Kaiyuan	103.26												23.75
29	Panjiangzhen_Yanfangxiang	103.92												25.78
33	Palembang	104.71												-2.83
35	Pusri_IB	104.806												-2.97587
47	Xiaozhaibazhen	106.72												27.18
51	Kujang_Ammonia_Plants	107.429												-6.40623
60	Gresik_Ammonia_Plant	112.638												-7.1525
70	Kaltim_Parna_Ammonia_Plant	117.496												0.176768
81	Pingtung	120.54												22.64
0	Blitar_City	112.05												-8.02
19	Yabulu	146.617												-19.193
24	rivalea_australia_corowa	146.33												-35.97
26	riverina_feedlot	146.48												-34.64
49	caroona_feedlot	150.38												-31.39
50	caroona_feedlot	150.38												-31.39
53	killara_feedlot	150.59												-31.47
54	killara_feedlot	150.59												-31.47
63	whyalla_feedlot	151.05												-28.75
64	whyalla_feedlot	151.05												-28.75
69	sandalwood_feedlot	151.43												-27.14
70	sandalwood_feedlot	151.43												-27.14

## Sheet: IASI_A_10yr
index	code_name	Name	region_IASI_A	lon	lat	Emission_IASI_A	Emission_uncertainty_IASI_A	HTAPv2_no_agri_0.500.25	HTAPv2_0.500.25	HTAPv2_no_agri_1.000.50	HTAPv2_1.000.50	HTAPv2_no_agri_1.001.00	HTAPv2_1.001.00	corr_x_IASI_A
1	quinta_da_senhora_da_luz_11	quinta_da_senhora_da_luz	Europe_wide	-8.98	39.34	9.12127	0.28411	0.0713148	0.697036	0.322105	2.95416	0.598658	5.16357	0.36087
3	intergados_vicente_nobre_13	intergados_vicente_nobre	Europe_wide	-8.87	39.28	9.69032	0.276842	0.118659	1.01767	0.307983	2.89266	0.64264	5.20391	0.38964
8	aterro_de_lamas_18	aterro_de_lamas	Europe_wide	-8.67	39.45	6.74885	0.255507	0.0706595	0.752991	0.239245	2.33118	0.553228	5.02384	0.3096
26	finca_ca_ada_de_ronquera_33	finca_ca_ada_de_ronquera	Europe_wide	-5.7	37.42	5.69615	0.177172	0.110315	1.8746	0.303339	5.04913	0.483581	8.08667	0.414039
32	El_Viso_Pozoblanco_423	El_Viso_Pozoblanco	Europe_wide	-4.89	38.43	10.5907	0.237533	0.0484954	0.357587	0.12115	1.45454	0.213529	2.97268	0.520847
33	granja_las_olmeras_cb_39	granja_las_olmeras_cb	Europe_wide	-4.86	37.23	4.79752	0.171009	0.0761822	1.0438	0.352325	4.96628	0.626598	9.77353	0.34561
36	Menasalbas_425	Menasalbas	Europe_wide	-4.26	39.64	12.0052	0.283586	0.0335854	1.05619	0.124112	4.0365	0.334961	8.50982	0.503894
37	Puertollano_ammonia_plant_723	Puertollano_ammonia_plant	Europe_wide	-4.06063	38.6696	7.27556	0.245722	1.58128	2.01028	2.00466	4.28734	2.1306	6.07463	0.384574
63	holcim_f_brica_de_lorca_69	holcim_f_brica_de_lorca	Europe_wide	-1.71	37.7	18.3356	0.350925	0.0478939	1.10013	0.157993	3.62916	0.288364	7.68846	0.582457
71	Canovas_422	Canovas	Europe_wide	-1.26	37.74	23.1489	0.323701	0.0471831	1.003	0.656492	3.71685	0.815166	6.75794	0.697197
73	carnicas_75	carnicas	Europe_wide	-1.13	37.99	12.4939	0.331321	0.0922772	1.43155	0.240131	4.13439	0.880262	7.15646	0.461521
75	eclosion_sas_78	eclosion_sas	Europe_wide	-1.05	47.08	12.2202	0.327627	0.0692562	1.37417	0.278686	5.97149	0.534143	11.4496	0.377816
85	Arzew_Sofert_Ammonia_Plants_580	Arzew_Sofert_Ammonia_Plants	Europe_wide	-0.340962	35.8059	14.3859	0.358104	0.0345133	0.190793	0.0767855	0.612447	0.12509	1.12034	0.450499
92	sat_la_vall_de_soses_91	sat_la_vall_de_soses	Europe_wide	0	42	13.5069	0.532231	0.168699	2.28079	0.227753	5.85447	0.277152	8.40541	0.32204
96	lleidacamp_98	lleidacamp	Europe_wide	0.42	41.8	24.3658	0.542834	0.0408727	2.49197	0.281769	7.34505	0.382251	11.2377	0.543297
98	cal_muntany_s_sat_1058_99	cal_muntany_s_sat_1058	Europe_wide	1	42	14.0221	0.405608	0.0233335	2.90452	0.0757277	7.48367	0.201206	11.5582	0.424887
113	ursa_benelux_114	ursa_benelux	Europe_wide	3.36	50.89	17.7222	0.410223	0.200901	7.97111	0.69407	19.8655	1.73088	28.3261	0.443812
118	arcelor_mittal_gent_121	arcelor_mittal_gent	Europe_wide	3.81	51.17	11.0832	0.360959	0.11832	2.20175	1.29866	9.72134	1.89018	17.9505	0.33338
141	attero_venlo_143	attero_venlo	Europe_wide	6.11	51.39	11.9033	0.371004	0.099162	4.9229	0.942224	14.6552	1.76066	25.1283	0.354626
143	de_haan_bv_146	de_haan_bv	Europe_wide	6.33	53.1	10.6436	0.353428	0.112512	2.67474	0.255723	9.45543	0.364766	13.5266	0.310517
159	heidelbergcement_ag_zementwerk_ennigerloh_161	heidelbergcement_ag_zementwerk_ennigerloh	Europe_wide	8.03	51.86	10.6421	0.348644	0.142569	3.19072	0.364707	16.2694	0.813964	26.491	0.334448
175	Brunsbuttel_Ammonia_Plant_849	Brunsbuttel_Ammonia_Plant	Europe_wide	9.21377	53.9113	11.6704	0.342008	0.0318194	2.46529	0.125241	8.83583	0.358667	19.8378	0.328056
180	saintgobain_isover_italia_spa_182	saintgobain_isover_italia_spa	Europe_wide	9.63	45.52	15.5927	0.719209	0.218154	8.70953	0.761136	29.1893	1.17027	44.0864	0.343915
187	Gadesco_Pieve_CHP_812	Gadesco_Pieve_CHP	Europe_wide	10.12	45.15	18.6895	0.585489	0.0896933	7.77056	0.513308	41.4548	1.04623	58.0951	0.436909
193	sia_societ_industria_agglomerati_srl_191	sia_societ_industria_agglomerati_srl	Europe_wide	10.52	44.92	15.123	0.526572	0.165383	5.98346	0.532069	22.4806	1.08721	57.0851	0.390615
198	Sapio_Mantua_Hydrogen_Plant_488	Sapio_Mantua_Hydrogen_Plant	Europe_wide	10.8489	45.1438	14.8257	0.485903	0.132121	9.25073	0.533269	37.3281	1.09785	54.5388	0.407113
204	solvay_chemicals_gmbh2_200	solvay_chemicals_gmbh2	Europe_wide	11.25	51.8	8.96228	0.32269	0.0456529	0.904806	0.140563	3.50183	1.42533	7.75914	0.30734
208	mfp_landwirtschaftliche_produktions_gmbh_204	mfp_landwirtschaftliche_produktions_gmbh	Europe_wide	11.45	52.05	9.81802	0.3364	0.0338282	0.509445	0.548923	3.19838	0.687137	8.89191	0.31835
212	lagerhaus_klein_wanzleben_gmbh_cokg_208	lagerhaus_klein_wanzleben_gmbh_cokg	Europe_wide	11.55	51.85	12.5682	0.322853	0.0351919	0.455138	0.115201	2.72774	0.755848	8.06603	0.40965
258	Police_Ammonia_I_710	Police_Ammonia_I	Europe_wide	14.5403	53.5718	11.2934	0.328806	0.0228839	0.380812	0.0648441	2.04025	0.346414	4.47349	0.33046
277	Kutina_ammonia_plant_698	Kutina_ammonia_plant	Europe_wide	16.8009	45.4679	11.8767	0.276459	0.836248	1.27666	1.02403	3.99606	1.21825	7.18217	0.49525
288	Duslo_Sala_Ammonia_II_700	Duslo_Sala_Ammonia_II	Europe_wide	17.9447	48.1809	6.36692	0.21403	0.11761	0.993766	0.184026	3.22076	0.298489	7.29139	0.319408
291	janikowskie_zak_ady_sodowe_janikosoda_sa_279	janikowskie_zak_ady_sodowe_janikosoda_sa	Europe_wide	18.1	52.75	8.10749	0.23361	0.0165413	0.90021	0.0499517	3.15917	0.201842	8.21445	0.356906
295	Kedzierzyn_Ammonia_Plant_714	Kedzierzyn_Ammonia_Plant	Europe_wide	18.2499	50.3162	11.5939	0.267082	0.0369548	0.851565	0.208557	3.04598	0.702545	6.76731	0.455194
306	Marsa_el_Brega_ammonia_I_745	Marsa_el_Brega_ammonia_I	Europe_wide	19.5989	30.4008	9.34566	0.264296	0.00114754	0.0488921	0.00117673	0.149438	0.00128397	0.201673	0.438346
309	Biezun_419	Biezun	Europe_wide	19.88	52.97	10.8014	0.275895	0.00827266	0.886242	0.0474116	4.48513	0.102146	8.80094	0.40002
312	Pancevo_Ammonia_Plant_699	Pancevo_Ammonia_Plant	Europe_wide	20.6646	44.8436	5.52129	0.199478	0.182341	0.827142	0.33488	4.639	0.46471	7.2855	0.333791
318	Pulawy_Azoty_I_713	Pulawy_Azoty_I	Europe_wide	21.9853	51.4577	20.6129	0.32235	0.0196214	0.658529	0.0735872	3.32751	0.146947	7.06733	0.600939
333	sc_ghcl_upsom_romania_sa_319	sc_ghcl_upsom_romania_sa	Europe_wide	23.86	46.39	4.56237	0.189042	0.0897955	0.677042	0.317966	2.63878	0.649415	5.72418	0.348657
334	Grodno_ammonia_3_697	Grodno_ammonia_3	Europe_wide	23.9077	53.675	23.6407	0.298846	1.21037	3.13195	1.24009	5.2768	1.2826	8.04374	0.631444
341	Jonava_Ammonia_Plant_No_1_690	Jonava_Ammonia_Plant_No_1	Europe_wide	24.3423	55.0881	16.8548	0.281859	0.0152807	0.800424	9.18392	11.8775	9.25332	13.583	0.530547
344	Targu_705	Targu	Europe_wide	24.5088	46.5169	14.7508	0.249059	0.156761	0.912732	0.404036	2.92509	0.734172	5.85454	0.683168
351	Turnu_Magurele_ammonia_I_702	Turnu_Magurele_ammonia_I	Europe_wide	24.8907	43.7218	6.30301	0.208259	0.245716	0.877898	0.815957	3.04739	1.6753	6.23051	0.368651
369	sc_amurco_srl_bacau_353	sc_amurco_srl_bacau	Europe_wide	26.94	46.51	6.98876	0.233627	0.188879	1.32567	0.530598	4.18247	1.02709	9.53713	0.347819
373	sc_amonil_sa_slobozia_708	sc_amonil_sa_slobozia	Europe_wide	27.3848	44.5322	11.4512	0.198291	0.0810286	0.830666	0.347728	4.19999	0.662831	7.70132	0.57686
384	MIDOR_Hydrogen_Plant_485	MIDOR_Hydrogen_Plant	Europe_wide	29.756	31.0241	13.8303	0.66643	0.434411	8.32003	1.17707	23.2502	1.22734	30.8648	0.315137
386	Basmakci_428	Basmakci	Europe_wide	30	37.88	5.93077	0.149449	0.0310772	0.836184	0.082469	1.92813	0.134935	3.49897	0.487195
387	Abu_Qir_Alexfert_Ammonia_plants_754	Abu_Qir_Alexfert_Ammonia_plants	Europe_wide	30.1005	31.2723	34.5764	0.834877	0.599927	3.77973	1.1605	18.1494	1.55641	46.6014	0.54922
389	Afyonkarahisar_427	Afyonkarahisar	Europe_wide	30.6	38.75	9.50209	0.152266	0.0195603	0.598602	0.0700939	2.199	0.152388	4.4926	0.663829
390	Odessa_ammonia_I_649	Odessa_ammonia_I	Europe_wide	31.001	46.6189	6.67367	0.206707	0.0115354	0.208079	0.546131	1.44913	0.567037	2.37901	0.330007
391	Acron_Novgorod_ammonia_I_689	Acron_Novgorod_ammonia_I	Europe_wide	31.2742	58.5256	9.63721	0.231532	0.0386052	0.249983	0.338482	0.822674	0.339367	1.08098	0.377796
393	Suez_ammonia_plant_860	Suez_ammonia_plant	Europe_wide	31.3802	31.0549	27.0495	0.632318	0.385993	10.3208	1.0425	53.0653	2.08174	92.0372	0.590341
395	Cherkassy_ammonia_I_661	Cherkassy_ammonia_I	Europe_wide	32.0678	49.3753	20.5675	0.245118	1.24839	1.93321	1.29993	3.68761	1.36199	5.66397	0.688663
398	Konya_430	Konya	Europe_wide	32.5	37.75	12.1893	0.180982	0.0206078	1.01507	0.0586987	2.48107	0.124225	4.34715	0.661188
401	ch_nikodimou_sia_ltd_382	ch_nikodimou_sia_ltd	Europe_wide	33.09	35.06	13.4517	0.21524	0.0620611	0.704101	0.188111	2.89559	0.345016	3.82463	0.7008
405	Dnieprodzerzhinksk_ammonia_II_658	Dnieprodzerzhinksk_ammonia_II	Europe_wide	34.6576	48.488	11.1527	0.203927	0.674033	1.41326	0.733785	2.62193	0.776058	4.08458	0.51375
406	Haql_465	Haql	Europe_wide	34.97	29.26	14.7366	0.313047	0.00132813	0.0767669	0.0286777	1.61851	0.034157	1.98578	0.64932
408	Al_Zarqa_Refinery_Hydrogen_Plant_529	Al_Zarqa_Refinery_Hydrogen_Plant	Europe_wide	36.1117	32.1232	7.27934	0.182457	0.117942	0.488929	0.407603	1.54748	0.519406	3.83896	0.529847
411	South_of_Homs_467	South_of_Homs	Europe_wide	36.74	34.66	7.17135	0.184535	0.117228	0.616599	0.158156	2.95457	0.370405	5.56898	0.497035
415	Cherepovets_ammonia_I_686	Cherepovets_ammonia_I	Europe_wide	37.9092	59.1323	12.8599	0.239356	0.132362	0.188951	0.286412	0.572464	0.287284	0.816455	0.469567
417	Horliwka_ammonia_I_652	Horliwka_ammonia_I	Europe_wide	38.103	48.3092	11.6006	0.218458	1.20577	1.98461	1.31261	3.43589	1.48084	6.0747	0.501032
418	Novomoskovsk_682	Novomoskovsk	Europe_wide	38.1708	54.0839	42.7649	0.393247	0.410093	0.718842	0.517671	1.71725	0.539898	2.95062	0.742396
420	Severodonetsk_ammonia_I_654	Severodonetsk_ammonia_I	Europe_wide	38.4621	48.9454	7.75037	0.179232	1.34409	1.87328	1.42164	3.40234	1.50562	4.78306	0.423496
426	Rossosh_ammonia_I_666	Rossosh_ammonia_I	Europe_wide	39.6784	50.1413	14.664	0.176896	0.0130865	0.430486	0.189671	1.86372	0.1985	3.40936	0.668392
429	Nevinnomyssk_I_684	Nevinnomyssk_I	Europe_wide	41.9515	44.661	18.6509	0.308419	0.0819097	0.520128	0.110592	2.35019	0.51827	4.66694	0.579171
436	Azot_Roustavi_694	Azot_Roustavi	Europe_wide	45.0585	41.5313	7.2798	0.334705	0.154077	1.02738	0.232045	6.09631	0.273321	10.1205	0.372949
441	Khor_Al_Zubair_417	Khor_Al_Zubair	Europe_wide	47.8362	30.1871	18.8374	0.476697	0.0297028	0.201966	0.192001	1.63363	0.331958	4.93	0.494864
442	At_Tawdihiyah_421	At_Tawdihiyah	Europe_wide	47.95	24.22	14.2594	0.231664	0.0048613	0.332355	0.0242759	0.622683	0.0257346	0.91769	0.616395
448	Kuibyshev_ammonia_677	Kuibyshev_ammonia	Europe_wide	49.4533	53.5542	53.943	0.496598	0.0892806	0.265055	0.238064	0.96883	0.39427	1.75311	0.753934
450	SAFCO_Ibn_Al-Baytar_ammonia_plants_762	SAFCO_Ibn_Al-Baytar_ammonia_plants	Europe_wide	49.5758	27.0728	24.1391	0.50748	0.523859	0.536951	0.754347	0.830148	0.946795	1.20897	0.535961
451	Togliatti_673	Togliatti	Europe_wide	49.6141	53.5437	66.3193	0.540663	0.0585072	0.24657	0.372677	0.97776	0.520012	2.03182	0.794219
452	ZMU_ammonia_nitrate_and_fertilizer_plant_403	ZMU_ammonia_nitrate_and_fertilizer_plant	Europe_wide	49.96	58.53	17.566	0.228337	0.0193569	0.0901272	0.466188	0.915914	0.467947	1.26681	0.610897
457	Aktau_Ammonia_I_692	Aktau_Ammonia_I	Europe_wide	51.2625	43.6209	9.81574	0.286407	0.031896	0.0587216	0.0329652	0.0945746	0.0334015	0.160813	0.37306
468	Shiraz_ammonia_I_773	Shiraz_ammonia_I	Europe_wide	52.7361	29.8905	17.362	0.326978	0.012957	0.950247	0.06614	2.91716	0.220843	5.3886	0.642383
470	Nezami_478	Nezami	Europe_wide	53.17	35.42	6.41302	0.174348	0.00282629	0.219203	0.00535792	0.920146	0.0115609	2.50725	0.439201
475	Salavat_ammonia_plant_674	Salavat_ammonia_plant	Europe_wide	55.9052	53.4002	20.5599	0.262793	0.081903	0.332533	0.170321	1.07933	0.174187	2.02775	0.642665
478	Permneftorgsintez_Refinery_Hydrogen_Plant_506	Permneftorgsintez_Refinery_Hydrogen_Plant	Europe_wide	56.1348	57.9086	8.49875	0.246791	0.164139	0.310199	0.220906	1.12378	0.224531	1.48272	0.347797
481	Berezniki_ammonia_I_688	Berezniki_ammonia_I	Europe_wide	56.7849	59.4132	38.5498	0.340827	0.0212178	0.138073	0.403293	0.618972	0.403897	0.743161	0.765666
482	Bojnurd_ammonia_plant_777	Bojnurd_ammonia_plant	Europe_wide	57.5108	37.5192	10.9443	0.251662	0.0513898	0.722938	0.07698	2.24496	0.0900523	4.06367	0.554441
491	Mary_ammonia_I_663	Mary_ammonia_I	Europe_wide	61.844	37.4848	11.6593	0.332965	0.0284428	0.432877	0.0740038	1.76224	0.0766686	2.92527	0.39822
492	Navoiy_ammonia_I-II_647	Navoiy_ammonia_I-II	Europe_wide	65.3298	40.1114	28.0326	0.441878	0.0111968	1.55856	0.0164685	4.47499	0.017975	7.20856	0.583971
495	Vakhsh_ammonia_plant_664	Vakhsh_ammonia_plant	Europe_wide	68.8347	37.6797	9.74492	0.355566	0.235021	0.308035	0.887325	1.20177	1.85844	3.21043	0.443308
497	Engro_Daharki_Mirpur_Mathelo_Ammonia_Plant_781	Engro_Daharki_Mirpur_Mathelo_Ammonia_Plant	Europe_wide	69.6719	28.0383	55.548	1.80369	0.514417	4.01908	2.8399	15.4225	5.33557	28.3755	0.384318
9	Rohnert_Park_Petaluma_158	Rohnert_Park_Petaluma	North_America	-122.72	38.29	10.7867	0.266853	0.35279	2.52862	0.892727	4.78872	2.47197	7.17602	0.475193
14	Abbotsford_136	Abbotsford	North_America	-122.22	49.01	11.8667	0.240464	0.147625	4.46843	0.613697	9.34241	0.777911	10.3507	0.660914
32	Yakima_Valley_Sunnyside_177	Yakima_Valley_Sunnyside	North_America	-120	46.33	28.2076	0.330958	0.0243985	1.84048	0.0509368	4.50653	0.147986	5.98196	0.718885
38	San_Joaquin_Bakersfield_Refinery_Plants_168	San_Joaquin_Bakersfield_Refinery_Plants	North_America	-119.049	35.3988	39.4949	1.08415	3.95706	6.59444	4.61135	11.6197	5.03572	17.0174	0.542808
42	Chino_153	Chino	North_America	-117.56	33.99	23.0519	0.449237	5.90301	9.47885	12.9268	19.563	14.7953	23.0452	0.716842
46	THE_AMALGAMATED_SUGAR_COMPANY_LLC_NAMPA_15	THE_AMALGAMATED_SUGAR_COMPANY_LLC_NAMPA	North_America	-116.57	43.61	10.9072	0.263859	0.520265	5.79921	0.96308	11.2749	1.05176	15.5897	0.507567
48	Jerome_Wendell_164	Jerome_Wendell	North_America	-114.57	42.75	33.987	0.401748	0.0707219	7.42339	0.407149	17.2064	0.443133	24.53	0.73793
53	Oakley_165	Oakley	North_America	-113.92	42.3	19.6013	0.325161	0.00188001	1.60833	0.0206805	5.47907	0.954152	13.8129	0.65293
56	Carseland_ammonia_plant_314	Carseland_ammonia_plant	North_America	-113.591	50.8443	6.20535	0.188548	1.75954	2.20553	1.97536	3.82846	2.63828	7.48581	0.345552
58	Fort_Saskatchewan_ammonia_plant_and_Redwater_313	Fort_Saskatchewan_ammonia_plant_and_Redwater	North_America	-113.193	53.7257	8.04971	0.192242	0.332718	0.700059	4.11347	5.59183	4.18362	7.62255	0.387423
59	Milford_175	Milford	North_America	-113.14	38.23	11.6302	0.163406	0.00122036	0.838538	0.00864927	2.65807	0.0268636	5.04128	0.623284
60	Redwater_Ammonia_I_311	Redwater_Ammonia_I	North_America	-113.09	53.8425	6.39893	0.191268	3.18479	3.48876	3.79997	5.18453	3.99632	7.02959	0.318401
61	Lethbridge_26	Lethbridge	North_America	-112.8	49.9	40.6521	0.286954	0.0323895	2.6413	0.0783491	6.48767	0.0890552	7.82667	0.82942
62	Delta_174	Delta	North_America	-112.51	39.37	7.35548	0.126069	0.00476118	0.839058	0.111188	1.61355	0.143475	2.36196	0.624479
63	Stanfield_149	Stanfield	North_America	-112	32.9	20.2358	0.287683	0.0207061	0.994603	0.129058	2.46734	0.176857	4.72112	0.749119
64	Big_West_Oil_LLC_Big_West_Oil_Refinery_27	Big_West_Oil_LLC_Big_West_Oil_Refinery	North_America	-111.92	40.84	4.32892	0.201506	0.723479	0.77186	1.3295	1.99483	2.00304	4.1336	0.314752
74	Culiacancito_140	Culiacancito	North_America	-107.57	24.83	11.2136	0.296814	0.0182808	0.55222	0.0552623	2.86742	0.0670748	5.06295	0.581965
75	Hatch_170	Hatch	North_America	-107.28	32.59	8.56548	0.173717	0.00501006	0.581433	0.0302182	2.58836	0.13552	3.6462	0.553203
76	Vado_171	Vado	North_America	-106.63	32.12	11.7162	0.178312	0.114456	3.48592	0.24432	5.66164	0.513088	7.64385	0.649687
78	Delicias_141	Delicias	North_America	-105.42	28.2	14.1758	0.196634	0.0527766	0.468673	0.0554508	0.786089	0.0560764	1.00736	0.71539
79	Belle_Plaine_ammonia_plant_307	Belle_Plaine_ammonia_plant	North_America	-105.22	50.4328	8.28958	0.203601	0.624173	0.935686	0.639939	1.8435	0.648841	3.30361	0.390934
85	Dexter_Rosswell_169	Dexter_Rosswell	North_America	-104.43	33.29	17.0589	0.308719	0.0192741	3.49823	0.0277661	4.60725	0.0366988	6.08244	0.5869
86	Torreon_147	Torreon	North_America	-103.51	25.69	45.1519	0.636073	0.0352929	0.701744	0.0703125	2.10639	0.0831394	4.18098	0.782001
88	Acatic_138	Acatic	North_America	-102.9	20.78	20.1003	0.435922	0.00899109	1.79276	0.0855829	4.10248	0.190034	8.87606	0.57918
89	Eckley_Yuma_160	Eckley_Yuma	North_America	-102.57	40.14	23.2943	0.338645	0.00227608	1.26488	0.00608011	4.47819	0.0116985	9.65485	0.617434
90	Vista_Hermosa_de_Negrete_Los_Charcos_148	Vista_Hermosa_de_Negrete_Los_Charcos	North_America	-102.45	20.26	11.9136	0.386523	0.0157936	0.66288	0.0687474	4.78932	0.141099	8.7507	0.442447
91	Amarillo_34	Amarillo	North_America	-102.4	34.8	35.037	0.478301	0.00811728	5.72213	0.0149985	15.5255	0.0212212	27.7435	0.669096
92	Jalostotitlan_San_Juan_de_Los_Lagos_143	Jalostotitlan_San_Juan_de_Los_Lagos	North_America	-102.38	21.26	36.829	0.510425	0.00531945	2.17867	0.023823	7.9974	0.0822411	13.3791	0.747871
96	Great_Plains_Synfuels_Plant_381	Great_Plains_Synfuels_Plant	North_America	-101.836	47.3579	10.5975	0.275343	5.55906	5.71913	5.56072	6.27569	5.57299	7.43143	0.371227
98	Monclova_185	Monclova	North_America	-101.43	26.88	7.42698	0.173212	0.0113806	0.244127	0.012773	1.00597	0.0553525	2.11673	0.606173
102	Garden_City_166	Garden_City	North_America	-100.84	37.81	32.4307	0.474974	0.0126965	4.40915	0.0996565	12.2063	0.13899	21.2457	0.612224
107	Ezequiel_Montes_142	Ezequiel_Montes	North_America	-99.91	20.68	14.9178	0.277545	0.00896986	1.11091	0.0596863	3.3255	0.162126	6.97602	0.692631
109	Broken_Bow_167	Broken_Bow	North_America	-99.63	41.37	13.1737	0.436809	0.00104391	0.499233	0.00626415	3.75829	0.0231498	8.88269	0.321631
128	Wisner_168	Wisner	North_America	-96.93	41.97	33.976	0.598233	0.00448486	3.1402	0.0339555	11.7704	0.0768717	21.6118	0.548394
134	Sioux_163	Sioux	North_America	-96.3	43.15	33.5093	0.524248	0.0300998	5.32301	0.0500697	17.4328	0.198683	32.4307	0.590434
177	Donaldsonville_Faustina_ammonia_plants_301	Donaldsonville_Faustina_ammonia_plants	North_America	-90.9577	30.0987	15.4487	0.415708	10.9953	11.3007	20.1615	20.7566	24.6727	25.7431	0.451356
227	Royston_162	Royston	North_America	-83.11	34.29	13.6141	0.315902	0.0287029	6.96959	0.112662	15.6336	0.374364	23.0897	0.528269
237	Augusta_ammonia_plant_280	Augusta_ammonia_plant	North_America	-81.9302	33.4435	8.46596	0.311087	2.04828	2.35191	2.1792	3.25088	2.22608	4.71568	0.34375
259	Bridgewater_176	Bridgewater	North_America	-79.01	38.42	13.7498	0.315379	0.0554648	4.19556	0.114308	9.00971	0.211148	13.6606	0.480382
262	North_Carolina_123	North_Carolina	North_America	-78.02	35.1	21.2746	0.409433	0.0225895	18.402	0.0862859	46.5646	0.217408	61.2922	0.556603
272	Moa_172	Moa	North_America	-74.8881	20.6372	10.4505	0.406031	0.0137199	0.0925223	0.033746	0.591092	0.0675859	1.24	0.33777
2	Bamako_36	Bamako	Africa	-8.02	12.61	14.6058	0.584117	0.174589	0.473619	0.192162	1.2044	0.214726	2.26884	0.331191
38	Sasol_Synfuels_220	Sasol_Synfuels	Africa	29.1879	-26.5595	16.9882	0.402298	0.173356	0.68955	0.27425	2.23806	0.440131	5.26642	0.496004
43	Abu_Qir_Ammonia_I_187	Abu_Qir_Ammonia_I	Africa	30.1005	31.2723	20.084	0.443607	0.599927	3.77973	1.1605	18.1494	1.55641	46.6014	0.522201
45	Delta_Suez_Ammonia_plants_180	Delta_Suez_Ammonia_plants	Africa	31.3995	31.0723	21.5905	0.494608	0.385993	10.3208	1.0425	53.0653	2.08174	92.0372	0.521349
48	Omdurman_8	Omdurman	Africa	32.45	15.6	13.3446	0.296803	1.84827	2.32282	3.00173	4.2912	4.88786	7.7863	0.506639
67	Razi_Ammonia_I_207	Razi_Ammonia_I	Africa	49.0956	30.4306	9.2374	0.327205	0.00377096	0.5845	0.0172699	2.42369	0.026628	3.94357	0.366146
70	SAFCO_Samad_Ibn_Al-Baytar_ammonia_plants_194	SAFCO_Samad_Ibn_Al-Baytar_ammonia_plants	Africa	49.5758	27.0728	14.907	0.377076	0.523859	0.536951	0.754347	0.830148	0.946795	1.20897	0.442303
82	Shiraz_Ammonia_I_205	Shiraz_Ammonia_I	Africa	52.7361	29.8905	15.3927	0.271686	0.012957	0.950247	0.06614	2.91716	0.220843	5.3886	0.617254
98	OMIFCO_Ammonia_I_201	OMIFCO_Ammonia_I	Africa	59.4264	22.6392	11.5979	0.261411	0.00077848	0.00815079	0.0868636	0.226142	0.0952441	0.253778	0.573181
1	Omsk_Refinery_Hydrogen_Plant_115	Omsk_Refinery_Hydrogen_Plant	China	73.2274	55.075	5.567	0.159075	0.242152	0.330376	0.461755	1.06429	0.477403	1.86245	0.327314
17	Yankuang_Xinjiang_Coal_Chemicals_Co_Ltd_556	Yankuang_Xinjiang_Coal_Chemicals_Co_Ltd	China	81.05	44	8.77944	0.286036	0.0463464	2.37506	0.203171	9.6522	0.279781	12.4104	0.448613
19	CPI_Yili_SNG_Plant_498	CPI_Yili_SNG_Plant	China	81.2241	43.9569	10.3014	0.295631	0.0340713	1.90441	0.164925	8.41968	0.268677	12.7521	0.523935
20	Yili_SNG_plants_424	Yili_SNG_plants	China	81.4241	43.9169	9.97454	0.293609	0.0694598	3.99733	0.145125	8.14887	0.211121	11.672	0.520613
22	Phulpur_I_225	Phulpur_I	China	82.0465	25.5411	41.4674	1.7284	2.22058	6.89589	12.9702	36.2442	22.838	69.376	0.328574
28	Kuitun_Ammonia_Plant_505	Kuitun_Ammonia_Plant	China	84.9033	44.4265	10.8731	0.395439	0.0247645	1.51368	0.0890807	6.49581	0.150137	11.1881	0.437826
32	Kemerovo_Ammonia_I_203	Kemerovo_Ammonia_I	China	86.0623	55.345	15.8013	0.225412	0.0839311	0.152924	0.390599	0.816197	0.412551	1.26566	0.622942
38	Henan_Coal_Changji_SNG_Plant_421	Henan_Coal_Changji_SNG_Plant	China	87.2582	44.0112	11.1974	0.475547	0.0813038	4.76345	0.209466	12.4123	0.299628	16.8224	0.366552
39	Huadian_Changji_Ammonia_Plant_406	Huadian_Changji_Ammonia_Plant	China	87.3582	44.0612	12.1491	0.483218	0.0570158	3.30151	0.196061	11.3259	0.290186	16.1799	0.382253
42	Urumqi_Ammonia_Plants_638	Urumqi_Ammonia_Plants	China	87.6668	43.8256	18.8242	0.528611	0.014052	1.02517	0.114351	6.42185	0.232188	12.78	0.503303
43	Midong-Fukang_48	Midong-Fukang	China	87.7	43.95	29.6201	0.520602	0.0191353	1.21258	0.0926486	5.66827	0.198732	11.1135	0.682715
47	Wucaiwan_49	Wucaiwan	China	89.19	44.92	13.3684	0.294859	0.00285495	0.00285495	0.00953316	0.00953316	0.0190558	0.0190558	0.51258
52	Abakan_83	Abakan	China	91.03	53.73	10.7214	0.168904	0.00139967	0.083412	0.0572865	0.540288	0.0590275	1.03809	0.593205
63	Huangzhong-Qiangoucun-Xining_30	Huangzhong-Qiangoucun-Xining	China	101.53	36.49	13.158	0.380265	0.0787479	3.64049	0.22223	10.2608	0.391847	18.4153	0.460328
64	Gansu_Jinchang_Syngas_Plant_110	Gansu_Jinchang_Syngas_Plant	China	102.08	38.3708	12.5542	0.32021	0.0145742	0.367017	0.0911798	2.70705	0.195885	5.96197	0.469742
70	Yiliang_52	Yiliang	China	103.18	24.99	15.0255	0.766288	0.0810435	2.10746	0.301057	8.03348	0.57151	15.0647	0.370659
71	Kaiyuan_50	Kaiyuan	China	103.26	23.75	21.0618	0.536653	0.0466681	1.10526	0.209326	5.1107	0.524079	12.5368	0.570573
72	Yongjing_68	Yongjing	China	103.27	36.01	18.1579	0.409741	0.0462548	1.51224	0.174695	6.27304	0.373687	12.8692	0.610574
78	Panjiangzhen-Yanfangxiang_51	Panjiangzhen-Yanfangxiang	China	103.92	25.78	12.9462	0.610772	0.0756538	1.69527	0.304513	6.84971	0.629345	14.817	0.354295
81	Deyang-Guanghan-Xindu_31	Deyang-Guanghan-Xindu	China	104.24	30.87	25.7736	0.830948	0.155681	4.26477	0.729903	20.438	1.41331	39.8713	0.59847
84	Xingyi-Qianxinan_11	Xingyi-Qianxinan	China	104.88	25.21	14.6876	0.737068	0.143991	2.93227	0.433399	8.68287	0.943103	18.1382	0.331654
86	Bijie_Weste-to-Energy_Plant_307	Bijie_Weste-to-Energy_Plant	China	105.328	27.2854	14.4809	0.572204	0.17793	3.43483	0.561181	10.8783	1.14193	22.1179	0.357062
90	Ningxia_Baofeng_Methanol_Plant_241	Ningxia_Baofeng_Methanol_Plant	China	106.063	38.4797	32.4018	0.598704	0.111891	3.79975	0.268615	8.79957	0.497987	16.2674	0.622852
91	PetroChina_Ningxia_Ammonia_Plant_612	PetroChina_Ningxia_Ammonia_Plant	China	106.181	38.4719	29.6655	0.638476	0.0885453	3.25683	0.278262	9.08638	0.533551	17.308	0.564534
92	Qinghua_Group_Methanol_Plant_270	Qinghua_Group_Methanol_Plant	China	106.198	37.9975	16.7093	0.516132	0.117463	4.23321	0.280495	8.30389	0.501391	13.8165	0.412782
99	Juitai_Energy_Ordos_MEG_Plant_247	Juitai_Energy_Ordos_MEG_Plant	China	106.704	39.4724	18.894	0.41157	0.0143588	0.36126	0.0466394	1.05009	0.147328	4.11201	0.526921
100	Xiaozhaibazhen_10	Xiaozhaibazhen	China	106.72	27.18	19.604	0.692045	0.126937	2.1825	0.484263	8.46177	0.918722	16.6547	0.428742
106	Jizhong_Bayannur_Ammonia_Plant_279	Jizhong_Bayannur_Ammonia_Plant	China	107.388	40.7432	11.6935	0.330869	0.0360886	1.59069	0.170831	7.48085	0.27491	12.1697	0.41521
112	Jinnui_Neimeng_Wuyuan_517	Jinnui_Neimeng_Wuyuan	China	108.268	41.0884	13.1645	0.305436	0.0523972	2.57293	0.125018	6.05639	0.182759	8.18418	0.470923
117	Wulashan_26	Wulashan	China	108.73	40.68	14.5491	0.317197	0.0277403	1.06065	0.0863146	3.53658	0.143871	5.80975	0.495792
124	Pucheng_Weinan_MTO_Plant_328	Pucheng_Weinan_MTO_Plant	China	109.407	34.4955	19.7758	0.841946	0.207987	4.13279	0.61445	11.8587	1.23088	22.4405	0.431016
125	Weihe_Ammonia_Plant_III_588	Weihe_Ammonia_Plant_III	China	109.51	34.5	19.7653	0.804717	0.192527	3.75045	0.595245	11.2921	1.09553	19.9947	0.452428
129	Baotou_72	Baotou	China	109.68	40.66	22.5906	0.344192	0.0449945	1.79612	0.13017	5.66419	0.223	9.36268	0.634274
134	Shenhua_Baotou_MEG_Plant_88	Shenhua_Baotou_MEG_Plant	China	109.84	40.658	16.5834	0.346941	0.045361	1.82778	0.134765	5.78394	0.240113	10.0812	0.511205
140	Shenhua_Erdos_600	Shenhua_Erdos	China	110.157	39.3282	9.23784	0.312226	0.0262896	0.598174	0.1334	3.26713	0.248877	6.26934	0.339557
142	Jinjiezhen_76	Jinjiezhen	China	110.19	38.71	7.98447	0.277303	0.0633755	1.03654	0.198363	3.37782	0.447576	8.51745	0.331438
143	Sanwei_Neimenggu_Methanol_Plant_508	Sanwei_Neimenggu_Methanol_Plant	China	110.2	39	14.6214	0.313456	0.0657336	1.15527	0.196085	3.82184	0.318504	6.27687	0.496207
144	Sunjiachazhen_77	Sunjiachazhen	China	110.36	39.15	19.8	0.281304	0.0481922	1.23072	0.164612	3.85802	0.33813	8.21853	0.654249
146	Shaanxi_Shenmu_Chemical_Plant_586	Shaanxi_Shenmu_Chemical_Plant	China	110.453	38.8676	7.49567	0.262334	0.0437517	1.07238	0.229508	5.20147	0.477319	10.8077	0.329747
148	Linyi_Ammonia_Plant_302	Linyi_Ammonia_Plant	China	110.748	35.1218	17.4177	0.779785	0.202896	4.2156	0.591278	12.0025	1.15915	26.4749	0.404457
150	Jishan_Ammonia_Plant_386	Jishan_Ammonia_Plant	China	110.983	35.604	28.3623	0.796506	0.183345	3.68221	0.571803	11.2396	1.04308	19.8419	0.551624
153	Xiangfen_80	Xiangfen	China	111.4	35.91	16.736	0.711733	0.176196	3.47219	0.472052	8.99288	0.918745	17.2095	0.411653
154	Heqing_18	Heqing	China	111.44	27.6	13.4635	0.616619	0.173333	3.45119	0.555508	10.6565	0.986406	18.9291	0.325462
155	Chuxing_Yichang_Ammonia_Plant_113	Chuxing_Yichang_Ammonia_Plant	China	111.451	30.4758	25.3981	0.999756	0.14928	3.06472	0.494034	9.52129	0.958901	16.5234	0.392307
156	Hubei_Yihua_Ammonia_Plant_118	Hubei_Yihua_Ammonia_Plant	China	111.65	30.3904	46.7052	0.985808	0.157361	3.30074	0.503935	10.6316	1.00122	20.3937	0.603616
161	Sinopec_Zhijiang_611	Sinopec_Zhijiang	China	111.75	30.4167	36.8543	0.995145	0.129864	2.89521	0.500472	11.1627	0.977333	20.8066	0.498574
162	Xiaoyi_81	Xiaoyi	China	111.8	37.09	21.3313	0.582952	0.188996	3.81114	0.454484	8.4346	0.811929	14.0852	0.527118
169	Jiaocheng_42	Jiaocheng	China	112.2	37.58	25.8117	0.55743	0.148331	2.5419	0.439514	7.74659	0.836812	14.6733	0.602371
170	Hujizhen-Shuanghe-Linkuang_14	Hujizhen-Shuanghe-Linkuang	China	112.27	31.33	24.6307	0.863788	0.0937246	2.34053	0.422166	8.66084	0.886774	18.989	0.395996
171	Yangquan_Qingxu_Ammonia_Plant_367	Yangquan_Qingxu_Ammonia_Plant	China	112.359	37.6074	18.9933	0.62591	0.181259	3.46946	0.487563	8.80715	0.867758	15.255	0.449381
175	Taiyuan_Ammonia_Plant_304	Taiyuan_Ammonia_Plant	China	112.48	37.779	12.1477	0.551645	0.145289	2.64012	0.426041	7.43459	0.836947	14.7782	0.348098
179	Beiliuzhen_40	Beiliuzhen	China	112.6	35.46	33.3184	1.16888	0.0872934	1.50023	0.40952	7.23105	0.932104	28.0162	0.402814
182	Zezhou-Gaoping_46	Zezhou-Gaoping	China	112.87	35.64	38.6467	1.41612	0.100518	1.9625	0.45125	8.67916	0.981019	24.269	0.37544
184	Shanxi_Lu_CTL_Plant_471	Shanxi_Lu_CTL_Plant	China	112.931	36.4366	26.1546	0.943423	0.0911793	1.85188	0.437994	8.34197	0.853	15.9861	0.385842
187	Xiangyuan_Qiyi_Changzhi_Methanol_Plant_298	Xiangyuan_Qiyi_Changzhi_Methanol_Plant	China	113.105	36.3239	33.3476	1.0426	0.160853	3.07645	0.493675	9.57156	0.946798	18.4557	0.425408
190	Nanhai_Gasification_Plant_393	Nanhai_Gasification_Plant	China	113.143	23.0961	15.1204	0.585672	0.330917	6.63371	1.09423	20.9136	2.06559	38.8095	0.379437
191	Shanxi_Ammonia_Plant_626	Shanxi_Ammonia_Plant	China	113.229	36.3341	38.9171	1.03649	0.10238	1.92702	0.511918	10.7903	0.994495	21.0736	0.477319
196	Hubei_Shuanghuan_Chemical_613	Hubei_Shuanghuan_Chemical	China	113.567	30.9333	37.4133	0.99728	0.118578	3.00219	0.571023	13.9434	1.11449	25.681	0.471699
197	Henan_Jindadi_Ammonia_Plant_117	Henan_Jindadi_Ammonia_Plant	China	113.609	33.4379	29.661	0.979402	0.172735	8.71104	0.850905	41.9605	1.69448	83.8947	0.401302
199	Henan_Zhongxin_Chemical_Works_534	Henan_Zhongxin_Chemical_Works	China	113.667	35.2667	36.7627	1.12969	0.170358	9.3184	0.759088	38.975	1.44287	70.8649	0.43436
201	Haohua_Zhumadian_Ammonia_Phase_1_272	Haohua_Zhumadian_Ammonia_Phase_1	China	114.04	32.9833	26.3912	0.93053	0.250672	11.7667	0.827896	38.6855	1.62971	74.4303	0.366623
209	Hebei_Yangmei_Zhengyuan_Ammonia_Plant_402	Hebei_Yangmei_Zhengyuan_Ammonia_Plant	China	114.378	38.3064	29.1144	0.962977	0.291281	8.37104	0.876981	24.0919	1.6455	43.9531	0.399717
211	Jinshi_Shijiazhuang_Ammonia_Plants_475	Jinshi_Shijiazhuang_Ammonia_Plants	China	114.498	38.0436	29.979	1.00788	0.182779	5.35889	0.938593	26.6027	1.86343	52.6872	0.379666
212	Shijiazhuang-Gaocheng_16	Shijiazhuang-Gaocheng	China	114.77	38.09	30.902	1.04937	0.299371	8.62471	0.995087	29.1472	2.01185	59.5441	0.364692
219	Linquan_7	Linquan	China	115.28	33.07	25.4944	0.86068	0.163349	4.74863	0.828017	28.2584	1.66625	59.526	0.390754
224	Anhui_Haoyuan_Chemical_528	Anhui_Haoyuan_Chemical	China	115.817	32.9	18.8323	0.837846	0.242116	5.4659	0.806813	17.8649	1.61237	35.9108	0.30695
240	Huaihua_Anhui_Ammonia_Plant_485	Huaihua_Anhui_Ammonia_Plant	China	116.96	32.61	18.6602	0.715691	0.219005	4.15191	0.740502	14.395	1.53324	30.5446	0.352861
250	Shuizhaizhen_37	Shuizhaizhen	China	117.46	36.91	21.0923	0.758425	0.284663	8.58246	0.943403	28.9477	1.87584	58.4277	0.323195
258	Jiutai_Linyi_MEG_Plant_252	Jiutai_Linyi_MEG_Plant	China	118.258	35.0218	20.0203	0.874214	0.297985	9.11348	0.995213	27.8542	2.05683	53.8594	0.303745
262	Linyi_35	Linyi	China	118.47	34.94	30.9587	0.903975	0.205003	5.60565	1.08623	26.7616	2.17497	53.0464	0.432166
270	Shouguang_36	Shouguang	China	118.81	36.93	35.1526	0.720442	0.181427	4.94992	0.873446	24.6187	1.54281	42.8242	0.513476
280	Hulunbeier_Ammonia_Plant_539	Hulunbeier_Ammonia_Plant	China	119.716	49.2116	8.9445	0.19202	0.0288369	1.16026	0.0733513	2.69724	0.10321	3.29635	0.448313
291	Zhongyan_Kunshan_520	Zhongyan_Kunshan	China	120.985	31.3219	14.1209	0.60602	1.50673	7.29193	4.45348	22.5887	7.76937	43.1403	0.317825
301	Mulituzhen_24	Mulituzhen	China	122.24	43.46	16.2258	0.355233	0.0130081	0.759914	0.0586411	3.20784	0.1233	5.53452	0.462007
302	Tongliao_GEM_I_256	Tongliao_GEM_I	China	122.243	43.6529	15.5238	0.358998	0.0171647	1.12714	0.0721233	3.74168	0.135732	6.40826	0.440446
304	Hongyu_Zalantun_Ammonia_Plant_313	Hongyu_Zalantun_Ammonia_Plant	China	122.763	47.9959	8.87458	0.203633	0.0238754	0.814785	0.0793673	2.82817	0.172233	6.13167	0.439402
305	HulanErgi_17	HulanErgi	China	123.67	47.19	20.9795	0.333858	0.0604759	2.15539	0.160612	5.74714	0.27894	9.89003	0.557067
306	Changshan_20	Changshan	China	124.52	45.32	15.23	0.377064	0.0476157	2.19195	0.164657	7.66512	0.316301	14.0189	0.419571
307	Daqing_Oxochemicals_Plant_640	Daqing_Oxochemicals_Plant	China	125.05	46.5833	14.8481	0.323564	0.047418	1.17651	0.152008	4.16782	0.303076	9.30108	0.441226
308	Anju_66	Anju	China	125.65	39.62	11.2694	0.337988	0.804055	2.57283	2.9397	8.89503	6.01252	16.4408	0.421191
313	Harbin_Yilan_Coal_Gasification_Plant_468	Harbin_Yilan_Coal_Gasification_Plant	China	126.633	45.75	9.25859	0.328648	0.0457198	1.74084	0.175655	6.72348	0.448152	16.9577	0.312448
315	Yochon_Oxochemicals_Plant_616	Yochon_Oxochemicals_Plant	China	126.891	35.8052	16.5209	0.47804	0.402809	0.402809	0.683732	0.683732	1.02511	1.02511	0.425291
317	Anseong-Icheon_1	Anseong-Icheon	China	127.42	37.12	22.7535	0.501879	0.245518	0.245518	1.03736	1.03736	2.3429	2.3429	0.527869
330	Qitaihe_Bosheng_Fertilizer_Plant_102	Qitaihe_Bosheng_Fertilizer_Plant	China	130.882	45.8175	9.01225	0.289526	0.0395364	1.07063	0.114761	2.93884	0.275906	5.48703	0.363452
0	Karachi_Power_Plant_118	Karachi_Power_Plant	India	67.1385	24.7842	51.1129	1.19149	2.38296	2.90154	4.42539	7.5158	6.12496	11.8439	0.539557
2	Vakhsh_Ammonia_Plant_68	Vakhsh_Ammonia_Plant	India	68.8347	37.6797	9.32784	0.35935	0.235021	0.308035	0.887325	1.20177	1.85844	3.21043	0.423388
3	Engro_Daharki_Mirpur_Mathelo_Ammonia_Plants_76	Engro_Daharki_Mirpur_Mathelo_Ammonia_Plants	India	69.6719	28.0383	55.548	1.80369	0.514417	4.01908	2.8399	15.4225	5.33557	28.3755	0.384318
5	Fatima_Sadiqabad_Machhi_Ammonia_Plants_50	Fatima_Sadiqabad_Machhi_Ammonia_Plants	India	70.0305	28.2616	70.4612	1.61872	0.617978	3.43402	3.0623	15.7917	5.87325	26.5393	0.500771
9	Essar_Hazira_63	Essar_Hazira	India	72.6547	21.1048	34.3884	0.841304	2.57377	5.09988	4.23647	11.3982	6.69151	20.8078	0.530409
10	Thal_I_83	Thal_I	India	72.8717	18.7025	17.5962	0.696263	1.85208	3.00566	4.1228	7.83949	17.2435	25.0196	0.392602
11	Trombay_V_84	Trombay_V	India	72.8871	19.0413	25.5615	0.714583	7.16782	8.00255	15.5095	19.7172	20.7735	29.2401	0.513614
14	Ankleshwar_5	Ankleshwar	India	72.99	21.58	22.711	0.765423	1.16676	5.92565	3.12436	17.1317	8.39036	35.5623	0.424638
15	Narmada_Ammonia_Methanol_Plant_130	Narmada_Ammonia_Methanol_Plant	India	73.0076	21.7356	22.8872	0.775248	0.835983	4.00858	3.41438	18.0218	8.85182	37.8342	0.423326
26	Gadepan_Ammonia_I_108	Gadepan_Ammonia_I	India	76.1838	25.1524	23.2471	0.917292	0.717838	3.31091	3.74372	16.0517	6.83521	30.0979	0.321748
31	Vijaipur_I_87	Vijaipur_I	India	77.1499	24.4967	29.7352	0.855205	0.583829	3.62171	2.11432	12.4512	4.12681	24.6539	0.415698
36	Namakkal_1	Namakkal	India	78.16	11.24	20.6942	0.716479	0.979117	3.77465	5.46304	20.6402	11.4413	43.1651	0.381856
38	Hyderabad_0	Hyderabad	India	78.49	17.41	24.799	0.964732	2.48294	7.32497	5.51468	21.0312	9.0286	38.9167	0.325864
46	Phulpur_I_99	Phulpur_I	India	82.0465	25.5411	41.4674	1.7284	2.22058	6.89589	12.9702	36.2442	22.838	69.376	0.328574
3	Cartavio_Chicama_Trujillo_6	Cartavio_Chicama_Trujillo	South_America	-79.06	-7.98	14.2305	0.553557	0.0753102	0.471254	0.147111	1.29447	0.152407	2.1207	0.51509
4	Tiroles_El_Condor_13	Tiroles_El_Condor	South_America	-77.54	-10.98	14.2629	0.528077	0.00756547	0.477134	0.0188904	1.3255	0.0280056	2.6307	0.547626
8	Punta_Hermosa_11	Punta_Hermosa	South_America	-76.79	-12.28	17.8096	0.619777	0.234776	0.413873	0.958057	2.05542	1.41738	3.49713	0.560889
10	Alto_Laran_District_4	Alto_Laran_District	South_America	-76.04	-13.44	19.4038	0.509373	0.0121247	0.142744	0.0170401	1.14468	0.0366247	2.3399	0.671403
16	Vitor_District_Arequipa_14	Vitor_District_Arequipa	South_America	-71.7	-16.44	6.40303	0.166919	0.140172	0.274102	0.152807	0.686415	0.155515	1.13042	0.680943
18	Las_Chacras_2	Las_Chacras	South_America	-71.57	-34.23	7.66943	0.391923	0.00802743	0.728874	0.0495726	3.79706	0.161274	8.57045	0.31011
41	Macedo_20	Macedo	South_America	-48.51	-14.36	9.94495	0.467192	0.00120696	0.532202	0.0138011	2.55802	0.0190949	5.14969	0.318952
51	Sergipe_Ammonia_Plant_89	Sergipe_Ammonia_Plant	South_America	-37.1432	-10.771	10.586	0.496023	0.0381094	0.463549	0.47243	2.68703	0.675667	5.71505	0.37126
52	Niquelandia_999	Niquelandia	South_America	-48.4015	-14.357	14.0166	0.477296	0.00116504	0.549043	0.0138376	2.50076	0.0183848	5.02503	0.423457
6	Asean_Aceh_Fertilizer_Plant_92	Asean_Aceh_Fertilizer_Plant	South_East_Asia	97.027	5.24652	7.27962	0.300675	0.56769	1.66889	2.92476	8.01627	3.50665	11.482	0.377551
7	Thung_Luang_Chom_Bueng_4	Thung_Luang_Chom_Bueng	South_East_Asia	99.69	13.39	16.1605	0.588422	1.26675	3.54648	3.21707	9.19482	5.7572	17.6497	0.380923
11	Bangchak_Refinery_Hydrogen_Plant_39	Bangchak_Refinery_Hydrogen_Plant	South_East_Asia	100.593	13.6868	13.0669	0.46558	6.63307	8.93195	17.6085	25.339	21.0777	32.9428	0.356503
28	Palembang_18	Palembang	South_East_Asia	104.71	-2.83	41.6113	0.961853	0.84676	3.64187	2.44465	16.7172	4.61452	30.0828	0.562715
30	Pusri_IB_95	Pusri_IB	South_East_Asia	104.806	-2.97587	60.1701	0.851438	1.01653	5.46138	2.5557	17.3903	4.72831	32.1831	0.741663
32	Xingyi_Qianxinan_7	Xingyi_Qianxinan	South_East_Asia	104.88	25.21	13.6699	0.60298	0.143991	2.93227	0.433399	8.68287	0.943103	18.1382	0.300862
34	Sinopec_Guizhou_MTO_Plant_110	Sinopec_Guizhou_MTO_Plant	South_East_Asia	105.3	27.3	13.1577	0.455636	0.17793	3.43483	0.561181	10.8783	1.14193	22.1179	0.362135
45	Kujang_Ammonia_Plants_83	Kujang_Ammonia_Plants	South_East_Asia	107.429	-6.40623	16.0262	0.443075	4.54935	8.75298	13.188	26.8615	24.6454	50.1917	0.496124
49	Sinopec_Maoming_Syngas_Plant_106	Sinopec_Maoming_Syngas_Plant	South_East_Asia	110.917	21.65	10.1691	0.397693	0.233263	2.50695	0.958829	9.69539	1.68492	16.7708	0.329128
52	Gresik_Ammonia_Plant_91	Gresik_Ammonia_Plant	South_East_Asia	112.638	-7.1525	27.5733	0.456958	2.31516	4.11123	8.27221	16.0259	12.877	25.4818	0.665421
61	Kaltim_Parna_Ammonia_Plant_84	Kaltim_Parna_Ammonia_Plant	South_East_Asia	117.496	0.176768	27.5697	0.61923	0.198037	0.343008	0.519302	1.12013	1.59656	2.97732	0.608914
23	riverina_feedlot_7	riverina_feedlot	Australia	146.48	-34.64	5.47037	0.16445	0.00181927	0.255196	0.0077204	1.25991	0.0133622	2.404	0.376948
24	riverina_feedlot_7	riverina_feedlot	Australia	146.48	-34.64	4.45715	0.160185	0.00181927	0.255196	0.0077204	1.25991	0.0133622	2.404	0.319443
43	wallumba_feedlot_16	wallumba_feedlot	Australia	150.24	-26.84	5.21344	0.211876	0.000207785	0.135967	0.0184242	0.768427	0.0193232	1.39866	0.335984
44	wallumba_feedlot_16	wallumba_feedlot	Australia	150.24	-26.84	4.64166	0.195254	0.000207785	0.135967	0.0184242	0.768427	0.0193232	1.39866	0.318637
47	caroona_feedlot_18	caroona_feedlot	Australia	150.38	-31.39	4.78941	0.162013	0.000996836	0.268473	0.00497881	1.08913	0.011682	2.14541	0.359765
48	caroona_feedlot_18	caroona_feedlot	Australia	150.38	-31.39	5.37346	0.162199	0.000996836	0.268473	0.00497881	1.08913	0.011682	2.14541	0.400787
51	killara_feedlot_20	killara_feedlot	Australia	150.59	-31.47	4.54787	0.174082	0.000552208	0.191556	0.00260394	0.947671	0.0182781	2.36443	0.327883
52	killara_feedlot_20	killara_feedlot	Australia	150.59	-31.47	4.87668	0.173535	0.000552208	0.191556	0.00260394	0.947671	0.0182781	2.36443	0.353863
61	whyalla_feedlot_25	whyalla_feedlot	Australia	151.05	-28.75	6.55326	0.173107	0.000130313	0.0965713	0.000961072	0.588059	0.00211541	1.93902	0.474914
62	whyalla_feedlot_25	whyalla_feedlot	Australia	151.05	-28.75	6.35816	0.186636	0.000130313	0.0965713	0.000961072	0.588059	0.00211541	1.93902	0.445463
67	sandalwood_feedlot_28	sandalwood_feedlot	Australia	151.43	-27.14	5.91827	0.191985	0.00564365	0.135763	0.0100403	0.807206	0.0645459	2.46949	0.391174
68	sandalwood_feedlot_28	sandalwood_feedlot	Australia	151.43	-27.14	5.31576	0.197216	0.00564365	0.135763	0.0100403	0.807206	0.0645459	2.46949	0.334619
73	kerwee_feedlot_30	kerwee_feedlot	Australia	151.55	-27.39	5.03	0.186832	0.00286989	0.209371	0.0613057	1.57755	0.0955121	2.62756	0.332179
74	kerwee_feedlot_30	kerwee_feedlot	Australia	151.55	-27.39	5.20239	0.214574	0.00286989	0.209371	0.0613057	1.57755	0.0955121	2.62756	0.317023
76	beef_city_feedlot_32	beef_city_feedlot	Australia	151.62	-27.52	4.81024	0.205832	0.00648992	0.470021	0.0660691	1.62162	0.0974073	2.80576	0.304529
89	Kapuni_Ammonia_Plant_41	Kapuni_Ammonia_Plant	Australia	174.165	-39.4766	8.29968	0.311478	0.00463106	1.15161	0.00698627	2.54476	0.0310678	4.00709	0.305934
60	Gresik_Ammonia_Plant	112.638												-7.1525
63	Nanhai_Gasification_Plant	113.143												23.0961
70	Kaltim_Parna_Ammonia_Plant	117.496												0.176768
1	Gresik_Ammonia_Plant	112.638												-7.1525
25	riverina_feedlot	146.48												-34.64
26	riverina_feedlot	146.48												-34.64
45	wallumba_feedlot	150.24												-26.84
46	wallumba_feedlot	150.24												-26.84
49	caroona_feedlot	150.38												-31.39
50	caroona_feedlot	150.38												-31.39
53	killara_feedlot	150.59												-31.47
54	killara_feedlot	150.59												-31.47
63	whyalla_feedlot	151.05												-28.75
64	whyalla_feedlot	151.05												-28.75
69	sandalwood_feedlot	151.43												-27.14
70	sandalwood_feedlot	151.43												-27.14
75	kerwee_feedlot	151.55												-27.39
76	kerwee_feedlot	151.55												-27.39
78	beef_city_feedlot	151.62												-27.52
91	Kapuni_Ammonia_Plant	174.165												-39.4766
